# Supplementary material
Source: PubMed Central journal article supplement (PMC5502610)
Supplement: pnas.1701658114.sapp.pdf [file pnas.1701658114.sapp.pdf]

# SI Appendix

## Evolutionary strata on young mating-type chromosomes despite the lack of sexual antagonism

Sara Branco<sup>1,a</sup>, H el ene Badouin<sup>1,a,b</sup>, Ricardo C. Rodr iguez de la Vega<sup>1,a</sup>, J er ome Gouzy<sup>b</sup>, Fantin Carpentier<sup>a</sup>, Gabriela Aguilera<sup>a</sup>, Sophie Siguenza<sup>b</sup>, Jean-Tristan Brandenburg<sup>a</sup>, Marco A. Coelho<sup>c</sup>, Michael E. Hood<sup>2,d</sup>, Tatiana Giraud<sup>2,a,\*</sup>

<sup>1</sup> These authors contributed equally to the study

<sup>2</sup> These authors jointly supervised the study

<sup>a</sup> Ecologie Syst ematique Evolution, B atiment 360, Univ. Paris-Sud, AgroParisTech, CNRS, Universit  Paris-Saclay, 91400 Orsay, France.

<sup>b</sup> LIPM, Universit  de Toulouse, INRA, CNRS, 31326 Castanet-Tolosan, France.

<sup>c</sup> UCIBIO-REQUIMTE, Departamento de Ci ncias da Vida, Faculdade de Ci ncias e Tecnologia, Universidade NOVA de Lisboa, 2829-516 Caparica, Portugal.

<sup>d</sup> Department of Biology, Amherst College, 01002-5000 Amherst, Massachusetts, United State of America.

\* Corresponding author: Tatiana Giraud (tatiana.giraud@u-psud.fr)

### SI Appendix Includes:

SI Text

SI Materials and Methods

SI References

SI Figures S1 – S10

SI Tables S1 – S7

## SI Text

### Mating-type chromosomes in fungi

There are several hypotheses for the evolution of recombination suppression in fungal mating-type chromosomes, some also holding for animal, plant and algal sex chromosomes. These include:

1) Linkage of two mating-type loci: Most basidiomycete fungi (i.e., mushrooms, rusts and smut fungi) contain two loci determining pre- and post-mating compatibility, respectively. The PR locus controls gamete fusion, with pheromone receptor and pheromone precursor genes (the latter sometimes being present in multiple copies), and the HD locus controls compatibility during growth of after fusion of haploids cells, with two adjacent homeodomain genes (1, 2, 3). Both PR and HD mating-type loci in basidiomycetes encompass two to several genes, and recombination is suppressed within each of these two loci, in all species, ensuring proper mating-type determination (3, 4). Linkage of these two mating-type loci is beneficial (but not required) under selfing mating systems in basidiomycete fungi as it increases the probability of compatibility among gametes from the same diploid parent (5-7) (Fig. S2). In contrast, the segregation of the two mating-type loci in association with multi-allelism increases discrimination against selfing and mating among closely related individuals, which promotes outcrossing (5-9). The PR and HD loci segregate independently in most basidiomycetes, but these loci are linked in some species (6, 10-13). Independent meiotic segregation of the two mating-type loci in basidiomycetes is called tetrapolarity (because meiotic segregation can result in four possible mating types among gametes of a diploid parent, Fig. S2A), while linkage of the mating-type loci in basidiomycetes leads to bipolarity (segregation of only two mating types among gametes of a diploid parent, Fig. S2C).

2) A second explanation for suppressed recombination in fungal mating-type chromosomes is the linkage of mating-type genes to the centromere. In ascomycete and basidiomycete automictic species (i.e., undergoing selfing among products of the same meiotic tetrad (11, 14, 15)), such linkage is particularly common and thought to be favorable (16, 17), resulting in mating-type segregation and reformation of the diploid between meiotic products separated at the first meiotic division. In basidiomycetes, linkage of both HD and PR mating-type genes to their respective centromeres increases the odds of compatibility within tetrads (Fig. S2B). Note that in basidiomycete fungi with linked HD and PR genes, linkage to the centromere is not beneficial with regard to the odds of compatibility between gametes, as it will not further increase mating compatibility among gametes in a diploid individual (Fig. S2C).

3) In analogy to the sexually antagonistic selection hypothesis, which is the main theory for explaining evolutionary strata in sex chromosome evolution, there could be “mating-type antagonistic selection” (18) if some phenotypes were beneficial for improving the  $a_1$  function while being detrimental

to the  $a_2$  function, or vice versa. However, there are not many traits that could have different optima in the two mating types.

4) Epistatic interactions can also favor linkage for protecting beneficial combinations of alleles, unrelated to mating type or sex functions. Unlike hypothesis 3 above that also deals with epistasis (19), this fourth hypothesis postulates that beneficial allelic combinations do not improve the  $a_1$  and  $a_2$  mating type functions in themselves, and therefore does not correspond to “mating-type antagonistic selection”. Epistatic interactions can also occur on autosomes but the maintenance of alternative alleles should be facilitated when linked to the mating-type or sex-determining genes, which are under strong balancing selection.

5) Another evolutionary explanation for suppressed recombination on fungal mating-type chromosomes, that could also apply to sex chromosomes, involves linkage of deleterious alleles to the mating-type loci, favoring permanent sheltering in an heterozygous state, as has been theoretically modeled (20, 21). This may arise specifically in sex and mating-type chromosomes if recombination frequency gradually decreases from the non-recombining into the PAR, so that partial linkage (linkage disequilibrium) to mating-type or sex-determining genes makes selection against recessive deleterious alleles less efficient. This would allow deleterious alleles to increase in frequency in these PAR edges at the margin of the non-recombining region. Rare recombination events would then generate individuals homozygous for deleterious alleles and could therefore be selected against. Complete linkage of these PAR margins in disequilibrium with mating type may thus be favorable and selected for (Fig. S1A). Permanent sheltering would thus be more easily achieved than purging if recombination is rare at the PAR margins. Further theoretical models are needed to explore the general conditions under which such a mechanism can generate evolutionary strata.

6) A last mechanism explaining suppressed recombination involves neutral inversions or rearrangements extending the region of suppressed recombination (22); these could be fixed by drift in one of the sex or mating-type chromosomes and arrest recombination between sex or mating-type chromosomes. For example, an inversion trapping a part of the PAR at the margin of the non-recombining region could be neutral in the short term, and could be fixed by drift in one of the sex or mating-type chromosomes, and not the other, because of the recombination suppression and because of mating occurring only between mating types (Fig. S1B and C). Such phenomena can occur on any chromosome, but linkage in mating-type and sex chromosomes could be maintained longer in a polymorphic state (and therefore be more detectable), due to balancing selection retaining alternate alleles determining sexes and mating types (22). As for the hypothesis above, theoretical models could be developed for validating whether such a mechanism can generate evolutionary strata.

## The *Microbotryum lychnidis-dioicae* system

Contributing to understanding of these various evolutionary models, the anther-smut fungus *Microbotryum lychnidis-dioicae* has been important for the study of fungal mating-type chromosomes. It was central to the first studies describing bipolar breeding systems in fungi (23) and the first case of size-dimorphic mating-type chromosomes in fungi (24). Suppressed recombination encompasses ca. 90% of the mating-type chromosome lengths (sized 3.5 Mb for  $a_1$  and 4.0 Mb for  $a_2$ ) with 614 and 683 predicted non-transposable element genes, respectively (12, 24-27). The non-recombining region shows chaos of rearrangements and gene losses, transposable element accumulation, non-synonymous substitutions and impaired gene expression (12, 27). The non-recombining region is flanked at both sides by two small recombining and collinear regions, therefore called pseudo-autosomal regions (PARs).

The existence of evolutionary strata has been debated in *M. lychnidis-dioicae*. Varying levels of synonymous divergence between  $a_1$  and  $a_2$  alleles in a handful of genes in the unassembled non-recombining region led to the claim that evolutionary strata existed (28). Based on highly fragmented assemblies, it was then speculated that an oldest stratum evolved for linking pheromone precursor and pheromone receptor genes, a second small (60 kb) old stratum for linking the HD and PR locus, and a third recent and large stratum for linking the MAT genes to the centromeres (29). However, the full assemblies of the mating-type chromosomes recently showed that the HD and PR locus are 600 kb apart, that no clear discrete strata patterns were discernable using the current gene orders, as genes with different  $a_1$ - $a_2$  synonymous divergence levels (a proxy for time since recombination suppression) were dispersed chaotically along the chromosomes (12). These observations could be explained by a lack of evolutionary strata, extensive rearrangements of original strata, and/or gene conversion, which is known to occur in fungal mating-type chromosomes (30, 31). A recent study suggested the existence of five evolutionary strata along the mating-type chromosomes in *M. lychnidis-dioicae* using a clustering method based on putative oligonucleotide compositional differences between strata (32); however, this method did not seem to yield reliable inference because it could not retrieve the pseudo-autosomal boundary in one mating-type chromosome. Furthermore, each inferred stratum included genes with highly heterogeneous levels of divergence (12). Our study shows that the recovered putative strata in this previous study (32) in fact did not correspond to genuine evolutionary strata.

Elucidating whether evolutionary strata exist and which genomic regions they include is important for understanding how and why suppressed recombination evolved. The different mechanisms for explaining suppression of recombination outlined above do not all predict the existence of evolutionary strata. For example, linking the two mating-type loci would not generate multiple strata, while the successive linkage of deleterious alleles to the mating-type locus would (20). In this regard, an interesting feature of *M. lychnidis-dioicae* is that frequent deleterious alleles linked to mating types have been reported, that prevent haploid growth (14, 33, 34). In fact, many genes have been lost from

one or the other mating type (12) and transposable elements and non-synonymous substitutions have accumulated in non-recombining regions (12, 27).

### Genome assemblies and comparisons

We used Pacific Bioscience sequencing technologies to generate very high quality genome assemblies for the mating-type chromosomes of several *Microbotryum* species. The  $a_1$  and  $a_2$  haploid genomes of *M. lagerheimii* and one haploid genome of *M. intermedium* were well assembled, with 42 and 37 contigs for  $a_1$  and  $a_2$  *M. lagerheimii*, respectively, 24 contigs for *M. intermedium*, for an estimated number of chromosomes of 12 for haploid *Microbotryum* genomes (24). The mating-type chromosomes were well assembled; the HD chromosomes of *M. intermedium* and *M. lagerheimii* appeared assembled in a single contig each, and were homologous and syntenic between the species; the complete PR chromosome of *M. intermedium* matched two contigs in the  $a_1$  *M. lagerheimii* assembly, with a small inversion internal to one contig (the MC16 contig, in dark purple in Figure 2A; the inversion is represented by the orange links).

In addition to collinearity with *M. intermedium*, collinearity between the  $a_1$  and  $a_2$  mating-type chromosomes within *M. lagerheimii* (Fig. S4) indicates that recombination is frequent enough to conserve gene order along most of their lengths. In *M. lychnidis-dioicae* the recombining pseudo-autosomal regions of the mating-type chromosomes and autosomes are also highly collinear between  $a_1$  and  $a_2$  genomes, while the non-recombining regions of the mating-type chromosomes are thoroughly rearranged (Fig. S3).

The two distinct contigs carrying the PR and HD genes in *M. lagerheimii* (Fig. S4) are consistent with the species being tetrapolar, as inferred earlier based on meiotic segregation analysis of recombination between these mating-type loci (35). The high degree of collinearity between the mating-type chromosomes of *M. lagerheimii* and *M. intermedium*, and the finding of PR and HD genes in different contigs, each harbouring centromere-specific repeats (12) (Fig. 2A), indicate that *M. intermedium* is also tetrapolar.

We included comparisons of the mating-type chromosomes of *M. lychnidis-dioicae* and *M. violaceum s. str.* (Fig. S5B), whose haploid genomes were also well assembled (Table S4). Three contigs in the  $a_1$  *M. violaceum sens. str.* genome matched the  $a_1$  mating-type chromosomes of *M. lychnidis-dioicae*. In addition, these three contigs had some fragments joined together in the assembly of the *M. violaceum sens. str.*  $a_2$  genome (Fig. S5D), indicating that all three belonged to the mating-type chromosome. The non-recombining region was highly rearranged between *M. lychnidis-dioicae* and *M. violaceum s. str.* (Fig. S5B) in all four possible comparisons, as well as between  $a_1$  and  $a_2$  in both species (Fig. S5D).

We also compared the mating-type chromosomes of the sister species *M. lychnidis-dioicae* and *M. silenae-dioicae* (Fig. S5C), the latter being assembled in more contigs than other species (Table S4;

6 contigs for both  $a_1$  and  $a_2$  mating-type chromosomes). These different contigs had some fragments joined together in the assembly of the alternative mating type (Fig. S5E) and in *M. lychnidis-dioicae* (Fig. S5C), allowing assigning to mating-type chromosomes. The non-recombining region appeared homologous but already highly rearranged between *M. lychnidis-dioicae* and *M. silenes-dioicae* (Fig. S5C) in all four possible comparisons, as well as between  $a_1$  and  $a_2$  in *M. silenes-dioicae* (Fig. S5E).

## SI Materials and Methods

### DNA extraction and sequencing

DNA was extracted using the Qiagen Kit 10243 (Courtaboeuf, France) following manufacturer instructions and using a Carver hydraulic press (reference 3968, Wabash, IN, USA) for breaking cell walls. A haploid genome of *M. intermedium* (strain 1389-BM-12-12, collected on *Salvia pratensis*, Italy, Coord. GPS : 44.33353 & 7.13637), as well as the genomes of  $a_1$  and  $a_2$  haploid cells of *M. lagerheimii* (strain 1253, collected on *S. vulgaris*, near Chambéry, France, Coord. GPS : 45.4 & 6.11), *M. violaceum s. str.* (strain 1249, collected on *S. nutans*, Guarda, Switzerland, Coord. GPS : 46.777 & 10.16) and *M. silenes-dioicae* (strain 1303, collected on *S. dioica*, Bois Carre, Lac de Puy Vachier 45.026485 & 6.276612) were sequenced using the P6/C4 Pacific Biosciences SMRT technology (UCSD IGM Genomics Facility La Jolla, CA, USA) (Table S4).

### Assembly and annotation

We assembled the haploid genomes of  $a_1$  and  $a_2$  *M. lagerheimii*, *M. violaceum s. str.*, *M. silenes-dioicae*, and  $a_1$  *M. intermedium*, and re-assembled the reference genome of *M. lychnidis-dioicae* Lamole (12) into separated  $a_1$  and  $a_2$  haploid genomes. Assemblies of the genomes were generated with the wgs-8.2 version of the PBcR assembler (36) with the following parameters: genomeSize=30000000, assembleCoverage=50. Assemblies were polished with quiver software (<https://github.com/PacificBiosciences/GenomicConsensus>). A summary of raw data and assembly statistics is reported in Table S4.

The protein-coding gene models were predicted with EuGene (37), trained for *Microbotryum*. Similarities to the fungi subset of the uniprot database (38) plus the *M. lychnidis-dioicae* Lamole proteome (12) were integrated into EuGene for the prediction of gene models.

Mating-type chromosomes were identified by: 1) finding the contigs carrying the PR or HD mating-type genes in both  $a_1$  and  $a_2$  haploid genomes, 2) using BLAST to search the  $a_1$  against the  $a_2$  haploid genomes and visualizing the output using Circos (39) for identifying contigs with lack of collinearity, 3) blasting the haploid genomes against the completely assembled mating-type chromosomes of *M. lychnidis-dioicae* (12), 4) blasting the  $a_1$  contigs identified in the first steps to the whole  $a_2$  haploid genome, and reciprocally, to identify additional mating-type contigs, 5) repeating this process from step 3 until no additional contig was identified. These contigs were then orientated by: 1) using the centromere-specific repeats (12), as initial assemblies often yielded chromosome arms broken at their centromeres, with identifiable centromere-specific repeats on each separated contig (e.g., Fig. 2A); and 2) blasting the  $a_1$  and  $a_2$  mating-type contigs against each other for identifying the PARs as the collinear regions, that were then assumed to be at the edges of the chromosomes. When the mating-type

chromosomes were fragmented and internal contigs did not include centromeric repeats at one of its edges, it was impossible to recover contig orientation (as indicated in the figure captions).

### **Figures and statistical tests**

The Figures 2, S3, S4 and S5 were prepared using Circos (39). We analyzed gene order to identify larger blocks of synteny. Alleles were assigned between the two mating-type chromosomes and between species by applying orthomcl (40) to the protein data sets. The Student t test was performed using JMP v7 (SAS Institute).

### **Species tree**

We compared the translated gene models of five *Microbotryum* species and the red yeast *Rhodotorula babjevae* with blastp+ 2.30, and the output was used to obtain orthologous groups by Markov clustering (41) as implemented in OrthoMCL v1.4 (40). We aligned the protein sequences of 4,000 single-copy autosomal genes with MUSCLE v3.8.31 (42), and obtained the codon-based CDS alignments with TranslatorX (43). We used RAxML 8.2.7 (44) to obtain maximum likelihood gene trees for all 4,000 fully conserved single-copy genes and a species tree with the concatenated alignment of 2,100,301 codons with no gaps (trimal -nogaps option (45)) under the GTRGAMMA substitution model. We estimated the branch support values by bootstrapping the species tree based on the concatenated alignment and by estimating the relative internode and tree certainty scores based on the frequency of conflicting bipartitions for each branch in the species tree among the fully conserved single-copy genes (46).

### **Gene genealogies**

Gene genealogies were inferred for codon-based alignments of genes in the different strata using RAxML (44) version 8.2.7, assuming the GTRGAMMA model and rapid bootstrap (options: -f a and -# 100). We analyzed for trans-specific polymorphism levels all single-copy genes for which we had both alleles and all species.

### **Date estimates for recombination suppression**

In order to estimate dates of recombination suppression, we leveraged the codon-based alignments of single-copy orthologous groups yielding gene trees displaying trans-specific polymorphism in each evolutionary stratum, as the divergence between alleles associated to the  $a_1$  versus  $a_2$  mating types then corresponds to the time since recombination suppression. We could use three gene families in the purple stratum (1,744 aligned codons), 22 gene families in the black stratum (17,776 aligned codons) and four



gene families in the red stratum (2,726 aligned codons), with alignments including the five *Microbotryum* species and the red yeast used as outgroup, and gene genealogies showing trans-specific polymorphism. There was not enough single-copy gene families showing trans-specific polymorphism for reliable date estimate in the other evolutionary strata. Divergence times were estimated using BEAST v2.4.0 (47), the xml inputs being generated using BEAUTi, and setting the following parameters (others left as default values): unlinked substitution (HKY+G with empirical frequencies for each codon position) and clock models, Yule process to model speciation, and 10,000,000 mcmc generations sampled every 1,000. For all runs we used a single calibration prior at 0.42 million years, corresponding to the divergence between *M. lychnidis-dioicae* and *M. silenes-dioicae* (48), with a normal distribution and a sigma of 0.05.

### **Transposable element identification**

Repetitive DNA content was analyzed with RepeatMasker (49), using REPBASE v19.11 (50). For plotting  $d_s$  along chromosomes, these repeats were removed and further filtering of repeats was performed by blasting (tBLASTx) and removing those matching at more than five locations in the genome.

### **Polymorphism data and analyses**

To rule out high levels of polymorphism as the cause for the observed high  $d_s$  values in the *Microbotryum* mating-type chromosomes, we assessed the level of polymorphism across *M. silenes-dioicae* and *M. lychnidis-dioicae* by using multiple available genomes (Illumina paired-end 60x-100x), from individuals collected across Europe (29, 51). We only used genomes including a single mating-type chromosome ( $a_1$  or  $a_2$ ) either because a haploid strain was sequenced or because a lethal allele was linked to one mating type in a diploid strain so that only haploid cells carrying the alternative mating-type chromosome could be cultivated *in vitro* and sequenced (34, 51, 52). We compiled sequences for a total of ten  $a_1$  and fourteen  $a_2$  mating-type chromosomes of *M. lychnidis-dioicae*, and six  $a_1$  and eight  $a_2$  mating-type chromosomes of *M. silenes-dioicae* (Table S5).

We used two approaches to determine which mating-type chromosome(s) were present in genomes sequences ( $a_1$  or  $a_2$ ), by checking the presence/absence of the  $a_1$  and  $a_2$  pheromone receptor alleles. First, each genome was assembled *de novo* using SOAPdenovo (53) with default parameters, and searched using BLAST for the sequences of the pheromone receptor alleles of *M. lychnidis-dioicae* and *M. silenes-dioicae*, which are highly differentiated between  $a_1$  and  $a_2$  (54). In a second validation step, we counted the reads mapped against the two alleles of the mating-type pheromone receptors. Strains that displayed reads mapping against both alleles were excluded from further analyses.

We performed SNP calling as described previously (51). Reads were mapped with GLINT (T. Faraut & E. Courcelle, available at <http://lipm-bioinfo.toulouse.inra.fr/download/glint/>) with parameters

set as follows: minimum length of the high-scoring pair  $\text{hsp} \geq 90$ , with  $\leq 5$  mismatches, no gap allowed, only best-scoring hits taken into account. For each strain, we used as a reference for mapping the haploid PacBio genome assembly corresponding to its species and mating-type. Between 92% and 97% of reads were mapped as proper pairs, and the mapping coverage ranged from 50 to 171 (Table S5). SNPs were called with VarScan (55) (min-coverage 10, min-reads 5, min-avg-qual 30, min-var-freq 0.3, p-value 0.01), and filtered to remove SNPs located near indels, strand-biased SNPs and heterozygote SNPs.

To compute statistics of diversity, we generated pseudo-alignments of CDS in FASTA format from the VCF file produced by VarScan as previously (51). Pseudo-alignments are obtained by substituting reference nucleotides by their variants in the reference sequence. We then computed the  $\theta_\pi$  statistic of diversity with EggLib version 2 (56) for each species and mating-type.

We generated alignments combining the *M. lychnidis-dioicae* and *M. silenes-dioicae* sequences generated above, as well as sequences of the other species. Codon-based alignments of single-copy genes in mating-type evolutionary strata and autosomes were obtained with MUSCLE and translatorX (see above). We used a custom python script to incorporate the sequences of the multiple genomes of *M. lychnidis-dioicae* and *M. silenes-dioicae* while taking into account gaps in the translatorX alignments. Trees were computed with the RAxML rapid bootstrap mode (-f a -m GTRGAMMA -x # 100). To help visualization, trees were rooted using *R. babjevae* and *M. intermedium*, and strains were colored by mating-type with the ETE3 python toolkit (57).

For further checking that the observed differences in diversity levels between the pseudo-autosomal regions and the different strata in *M. lychnidis-dioicae* and *M. silenes-dioicae* (SI Appendix, Table S6) were not due to differences in mutation rates, we performed maximum-likelihood Hudson-Kreitman-Agade (MLHKA) tests as implemented in the MLHKA software (58) using the multiple genomes described above. The MLHKA test is designed to detect signatures of departure from neutrality (either balancing or positive selection) while controlling for mutation rate by the use of divergence data, and it allows multilocus comparisons (58). MLHKA tests can thus be used to test whether differences in diversity levels between two sets of genes is most likely due to elevated mutation rates or to balancing selection (in our case due to linkage of genes in evolutionary strata to mating-type genes), by comparing a model where all loci in the dataset evolve neutrally to an alternative model where  $N$  loci depart from neutrality (59, 60). Because MLHKA tests require a set of control loci that evolve neutrally, we applied these tests to pairwise comparisons between each stratum and the pseudo-autosomal region. To perform the MLHKA tests, we considered the pooled CDS sequences associated with the  $a_1$  and  $a_2$  mating-types for each stratum in each of *M. lychnidis-dioicae* and *M. silenes-dioicae* and used the genome of *M. violaceum sens. str.* as an outgroup. In order to improve divergence estimates, alignments were re-aligned with MACSE (61). Only synonymous sites were taken into account, and singletons were excluded. Unless stated otherwise, tests were run with 1,000,000 iterations of the Markov chain, and repeated at least three times with different random seed numbers to ensure convergence. We arbitrarily chose a starting value of 10 for divergence time, as this value is of little importance when the number of

iterations is high enough for the Markov chains to converge (58). Synonymous nucleotide diversity ( $\theta_\pi$ ) was computed with EggLib version 2 (56) and used as starting value for theta. As the test assumes independence between loci, we concatenated the alignments of the CDS for each evolutionary stratum. For the largest stratum (the black stratum), we randomly sampled and concatenated CDS for 20 genes, as the high number of genes in this stratum resulted in unreasonable running times. For the two most recent strata (red and green strata), we also ran the tests without concatenating the alignments, with 2,000,000 million of iterations of the Markov chains. This yielded similar results as concatenating the CDS. *Microbotryum lychnidis-dioicae* displays a strong population structure in Europe (51, 62), which can lead to over-estimate the diversity in neutral loci and result in false negative tests. In fact, visual inspection of the alignments showed that most polymorphic sites in the PARs in this species corresponded to fixed differences between genetic clusters. We therefore also ran tests separately on the two genetic clusters for which we had several strains of each mating-type, i.e., the Southern and North-Western clusters (51). We corrected p-values for multiple testing within each species with a Benjamini and Hochberg correction (R function p.adjust). In *M. silenes-dioicae*, tests for all strata were significant (adjusted p-values < 0.05, Table S7A), indicating that balancing selection was more likely than elevated mutation rates for explaining the higher diversity in strata than in the PARs. In *M. lychnidis-dioicae*, tests were also significant for the purple, blue, black and orange strata (adjusted p-values < 0.05, Table S7B-D). The difference in diversity between the red stratum and the PAR was marginally significant when considering the whole data set, and significant when the tests were run separately on two genetic clusters (Table S7B-D). There was no significant difference in diversity between the green stratum and the PAR in *M. lychnidis-dioicae*, suggesting that suppressed recombination is not complete there in this species, or that it is too recent to have allowed an accumulation of differences between mating types.

## SI References

1. Feldbrugge M, Kamper J, Steinberg G, & Kahmann R (2004) Regulation of mating and pathogenic development in *Ustilago maydis*. *Curr Op Microbiol* 7:666-672.
2. Kuees U (2015) From two to many: Multiple mating types in Basidiomycetes. *Fung Biol Rev* 29(3-4):126-166.
3. Casselton LA & Kues U (2007) The origin of multiple mating types in the model mushrooms *Coprinopsis cinerea* and *Schizophyllum commune*. *Sex in Fungi*, eds Heitman J, Kronstad J, Taylor J, & Casselton L (ASM Press, Washington, DC), Vol 88, pp 142 - 147.
4. Kues U (2000) Life history and developmental processes in the basidiomycete *Coprinus cinereus*. *Microbiol Mol Biol Rev* 64(2):316-453.
5. James TY (2015) Why mushrooms have evolved to be so promiscuous: Insights from evolutionary and ecological patterns. *Fung Biol Rev* 29(3-4):167-178.
6. Nieuwenhuis BPS, *et al.* (2013) Evolution of uni- and bifactorial sexual compatibility systems in fungi. *Heredity* 111:445-455.
7. Giraud T, Yockteng R, Lopez-Villavicencio M, Refregier G, & Hood ME (2008) The mating system of the anther smut fungus, *Microbotryum violaceum*: selfing under heterothallism. *Euk Cell* 7:765-775.
8. Heitman J, Sun S, & James TY (2013) Evolution of fungal sexual reproduction. *Mycologia* 105(1):1-27.
9. Kües U, James T, & Heitman J (2011 ) The mycota XIV : Mating type in basidiomycetes: Unipolar, bipolar, and tetrapolar patterns of sexuality. *Evolution of fungi and fungal-like organisms*, eds Pöggeler S & Wöstemeyer J (Springer-Verlag, Berlin, Heidelberg Germany).
10. Bakkeren G & Kronstad JW (1994) Linkage of mating type loci distinguishes bipolar from tetrapolar mating in basidiomycetous smut fungi. *Proc Natl Acad Sci USA* 91:7085-7089.
11. Idnurm A, Hood ME, Johannesson H, & Giraud T (2015) Contrasted patterns in mating-type chromosomes in fungi: Hotspots versus coldspots of recombination. *Fung Biol Rev* 29(3-4):220-229.
12. Badouin H, *et al.* (2015) Chaos of rearrangements in the mating-type chromosomes of the anther-smut fungus *Microbotryum lychnidis-dioicae*. *Genetics* 200(4):1275-1284.
13. Fraser JA, *et al.* (2004) Convergent evolution of chromosomal sex-determining regions in the animal and fungal kingdoms. *PLoS Biol* 2:2243-2255.
14. Hood ME & Antonovics J (2000) Intratetrad mating, heterozygosity, and the maintenance of deleterious alleles in *Microbotryum violaceum* (= *Ustilago violacea*). *Heredity* 85:231-241.
15. Menkis A, Jacobson DJ, Gustafsson T, & Johannesson H (2008) The mating-type chromosome in the filamentous ascomycete *Neurospora tetrasperma* represents a model for early evolution of sex chromosomes. *PLoS Genet* 4(3):e1000030.
16. Zakharov IA (1986) Some principles of the gene localization in eukaryotic chromosomes. Formation of the problem and analysis of nonrandom localization of the mating-type loci in some fungi. *Genetika* 22:2620-2624.
17. Zakharov IA (2005) Intratetrad mating and its genetic and evolutionary consequences. *Russ J Genet* 41:508-519.
18. Abbate JL & Hood ME (2010) Dynamic linkage relationships to the mating-type locus in automictic fungi of the genus *Microbotryum*. *J. Evol. Biol* 23(8):1800-1805.
19. Charlesworth D (2016) The status of supergenes in the 21st century: recombination suppression in Batesian mimicry and sex chromosomes and other complex adaptations. *Evol App* 9(1):74-90.

20. Antonovics J & Abrams JY (2004) Intratetrad mating and the evolution of linkage relationships. *Evolution* 58(4):702-709.
21. Johnson LJ, Antonovics J, & Hood ME (2005) The evolution of intratetrad mating rates. *Evolution* 59(12):2525-2532.
22. Ironside JE (2010) No amicable divorce? Challenging the notion that sexual antagonism drives sex chromosome evolution. *Bioessays* 32(8):718-726.
23. Kniep H (1919) Untersuchungen uber den Antherenbrand (*Ustilago violacea* Pers.). Ein Beitrag zum Sexualitatsproblem. *Z Bot* 11:257-284.
24. Hood ME (2002) Dimorphic mating-type chromosomes in the fungus *Microbotryum violaceum*. *Genetics* 160:457-461.
25. Hood ME, Antonovics J, & Koskella B (2004) Shared forces of sex chromosome evolution in haploids and diploids. *Genetics* 168:141-146.
26. Hood ME, Petit E, & Giraud T (2013) Extensive divergence between mating-type chromosomes of the anther-smut fungus. *Genetics* 193(1):309-315.
27. Fontanillas E, *et al.* (2015) Degeneration of the non-recombining regions in the mating type chromosomes of the anther smut fungi. *Mol Biol Evol* 32:928-943.
28. Votintseva AA & Filatov DA (2009) Evolutionary strata in a small mating-type-specific region of the smut fungus *Microbotryum violaceum*. *Genetics* 182(4):1391-1396.
29. Whittle CA, Votintseva A, Ridout K, & Filatov DA (2015) Recent and massive expansion of the mating-type specific region in the smut fungus *Microbotryum*. *Genetics* 199:809-816.
30. Menkis A, Whittle C, & Johannesson H (2010) Gene genealogies indicates abundant gene conversions and independent evolutionary histories of the mating-type chromosomes in the evolutionary history of *Neurospora tetrasperma*. *BMC Evol Biol* 10(1):234.
31. Sun S, Hsueh Y-P, & Heitman J (2012) Gene conversion occurs within the mating-type locus of *Cryptococcus neoformans* during sexual reproduction. *PLoS Genet* 8(7):e1002810.
32. Pandey RS & Azad RK (2016) Deciphering evolutionary strata on plant sex chromosomes and fungal mating-type chromosomes through compositional segmentation. *Plant Mol Biol* 90(4-5):359-373.
33. Hood ME & Antonovics JA (2004) Mating within the meiotic tetrad and the maintenance of genomic heterozygosity. *Genetics* 166:1751-1759.
34. Thomas A, Shykoff J, Jonot O, & Giraud T (2003) Sex-ratio bias in populations of the phytopathogenic fungus *Microbotryum violaceum* from several host species. *Int J Plant Sci* 164(4):641-647.
35. Hood ME, Scott M, & Hwang M (2015) Breaking linkage between mating compatibility factors: Tetrapolarity in *Microbotryum*. *Evolution* 69(10):2561-2572.
36. Koren S, *et al.* (2012) Hybrid error correction and de novo assembly of single-molecule sequencing reads. *Nat Biotechnol* 30:693-700.
37. Foissac S, *et al.* (2008) Genome annotation in plants and fungi: EuGene as a model platform. *Current Bioinformatics* 3:87-97.
38. Consortium TU (2011) Ongoing and future developments at the Universal Protein Resource. *Nucleic Acids Res* 39:D214-D219.
39. Krzywinski MI, *et al.* (2009) Circos: An information aesthetic for comparative genomics. *Genom Res* 19:1639-1645.
40. Li L, Stoeckert CJ, & Roos D (2003) OrthoMCL: identification of ortholog groups for eukaryotic genomes. *Genome Research* 13:2178-2189.
41. van Dongen S (2000) Graph clustering by flow simulation. PhD (University of Utrecht, The Netherlands).

42. Edgar R (2004) MUSCLE: multiple sequence alignment with high accuracy and high throughput. *Nucleic Acids Res.* 32 1792-1797.
43. Abascal F, Zardoya R, & Telford M (2010 ) TranslatorX: multiple alignment of nucleotide sequences guided by amino acid translations. *Nucleic Acids Res* 38:W7-13.
44. Stamatakis A (2006) RAxML-VI-HPC: maximum likelihood-based phylogenetic analyses with thousands of taxa and mixed models. *Bioinformatics* 22:2688-2690.
45. Capella-Gutierrez S, Silla-Martinez JM, & Gabaldon T (2009) trimAl: a tool for automated alignment trimming in large-scale phylogenetic analyses. *Bioinformatics* 25:1972-1973.
46. Salichos L, Stamatakis A, & Rokas A (2014) Novel Information Theory-Based Measures for Quantifying Incongruence among Phylogenetic Trees. *Molyang Biol Evol* 31(5):1261-1271.
47. Bouckaert R, *et al.* (2014 ) BEAST 2: a software platform for Bayesian evolutionary analysis. *PLoS Comput Biol* 10:e1003537.
48. Gladieux P, *et al.* (2011) Maintenance of fungal pathogen species that are specialized to different hosts: allopatric divergence and introgression through secondary contact. *Mol Biol Evol* 28:459-471.
49. Smit A & Green P (RepeatMasker at <http://www.repeatmasker.org/>).
50. Jurka J (1998) Repeats in genomic DNA: mining and meaning. *Curr Opin Struct Biol* 8:333-337.
51. Badouin H, *et al.* (2017) Widespread selective sweeps throughout the genome of model plant pathogenic fungi and identification of effector candidates. *Mol Ecol* 26:2041-2062.
52. Oudemans P, *et al.* (1998) The distribution of mating type bias in natural populations of the anther smut *Ustilago violacea* (= *Microbotryum violaceum*) on *Silene alba* (= *S. latifolia*) in Virginia. *Mycologia* 90:372-381.
53. Luo R, *et al.* (2012) SOAPdenovo2: an empirically improved memory-efficient short-read de novo assembler. *GigaScience* 1(1):18.
54. Devier B, Aguilera G, Hood M, & Giraud T (2009) Ancient trans-specific polymorphism at pheromone receptor genes in basidiomycetes. *Genetics* 181:209–223.
55. Koboldt D, *et al.* (2012) VarScan 2: Somatic mutation and copy number alteration discovery in cancer by exome sequencing. *Genom Res* 22:568-576.
56. De Mita S & Siol M (2012) EggLib: processing, analysis and simulation tools for population genetics and genomics. *BMC Genetics* 13(1):27.
57. Huerta-Cepas J, Serra F, & Bork P (2016) ETE 3: Reconstruction, Analysis, and Visualization of Phylogenomic Data. *Mol Biol Evol* 33(6):1635-1638.
58. Wright SI & Charlesworth B (2004) The HKA test revisited: A maximum-likelihood-ratio test of the standard neutral model. *Genetics* 168(2):1071-1076.
59. Qiu S, Bergero R, & Charlesworth D (2013) Testing for the Footprint of Sexually Antagonistic Polymorphisms in the Pseudoautosomal Region of a Plant Sex Chromosome Pair. *Genetics* 194(3):663-+.
60. Wright SI, *et al.* (2006) Testing for effects of recombination rate on nucleotide diversity in natural populations of *Arabidopsis lyrata*. *Genetics* 174(3):1421-1430.
61. Ranwez V, Harispe S, Delsuc F, & Douzery E (2011) MACSE: Multiple alignment of coding sequences accounting for frameshifts and stop codons. *PLoS ONE* 6:e22594.
62. Vercken E, *et al.* (2010) Glacial refugia in pathogens: European genetic structure of anther smut pathogens on *Silene latifolia* and *S. dioica*. *PloS Path* 6:e1001229.

## List of SI Figures

**Fig. S1.** Hypotheses for the generation of evolutionary strata on sex or mating-type chromosomes.

**Fig. S2.** Odds of compatibility among gametes of a diploid individual in basidiomycete fungi.

**Fig. S3.** Comparison of gene order between *Microbotryum lychnidis-dioicae* chromosomes.

**Fig. S4.** Synteny between a<sub>1</sub> and a<sub>2</sub> mating-type chromosomes of *Microbotryum lagerheimii*.

**Fig. S5.** Comparison of gene order between mating-type chromosomes.

**Fig. S6.** Examples of gene genealogies at non-mating type genes showing different levels of trans-specific polymorphism, i.e., with more or less ancient linkage to mating type.

**Fig. S7.** Cumulative percentage of genes showing trans-specific polymorphism across strata and age of trans-specific polymorphism relative to speciation events.

**Fig. S8.** Synonymous divergence between alleles associated with a<sub>1</sub> and a<sub>2</sub> mating types in the sequenced diploid individual in each of *Microbotryum silenes-dioicae* and *M. violaceum s. str.*, plotted along the ancestral gene order.

**Fig. S9.** Patterns of segregation of alleles at non-mating-type genes, associated with the a<sub>1</sub> and a<sub>2</sub> mating types, respectively, in gene genealogies using multiple resequenced genomes of *M. silenes-dioicae* (MvSd) and *M. lychnidis-dioicae* (MvSl).

**Fig. S10.** Genetic diversity in *Microbotryum lychnidis-dioicae* and *M. silenes-dioicae* ( $\theta\pi$ ) based on multiple genomes.

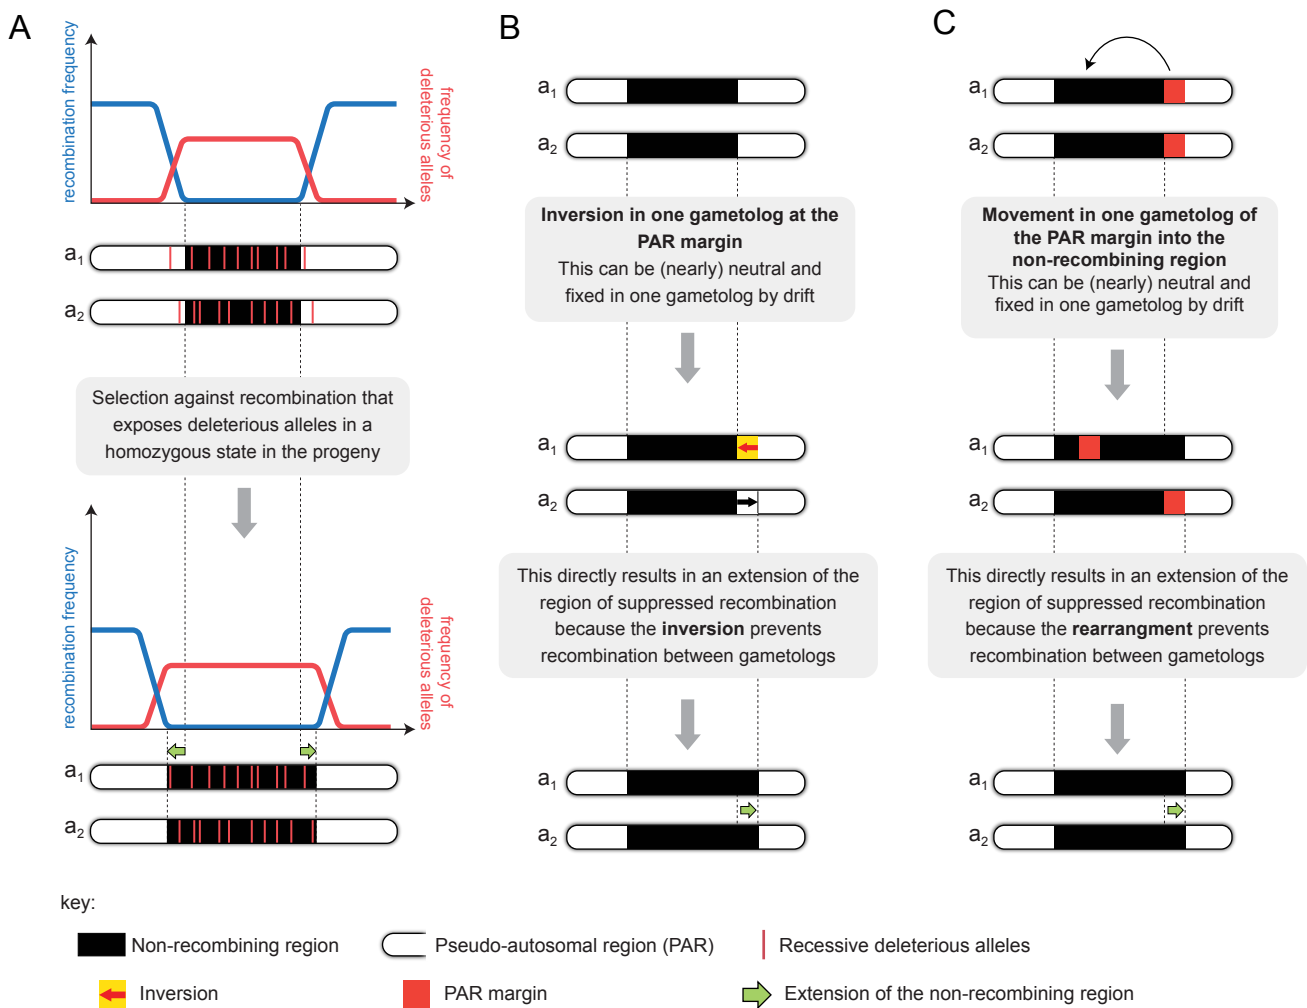

**Fig. S1. Hypotheses for the generation of evolutionary strata in sex or mating-type chromosomes.** (A) Expansion of linkage to the mating-type loci that encompasses partially linked genetic load loci, favoring permanent sheltering in a heterozygous state. This may occur if recombination frequency gradually decreases from the non-recombining region into the PAR, so that partial linkage (linkage disequilibrium) to mating-type or sex-determining genes makes selection against recessive deleterious alleles less efficient. This may allow deleterious alleles to increase in frequency in these PAR regions at the margin of the non-recombining region, further selecting for cessation of recombination. Rare recombination events would generate individuals homozygous for deleterious alleles and would therefore be selected against. Complete linkage of these PAR regions in linkage disequilibrium with mating type would be selected for. Alternative mechanisms for explaining suppressed recombination involve neutral inversions (B) or rearrangements (C) extending the region of suppressed recombination; these could be fixed by drift in one of the sex or mating-type chromosomes and arrest recombination between sex or mating-type chromosomes.



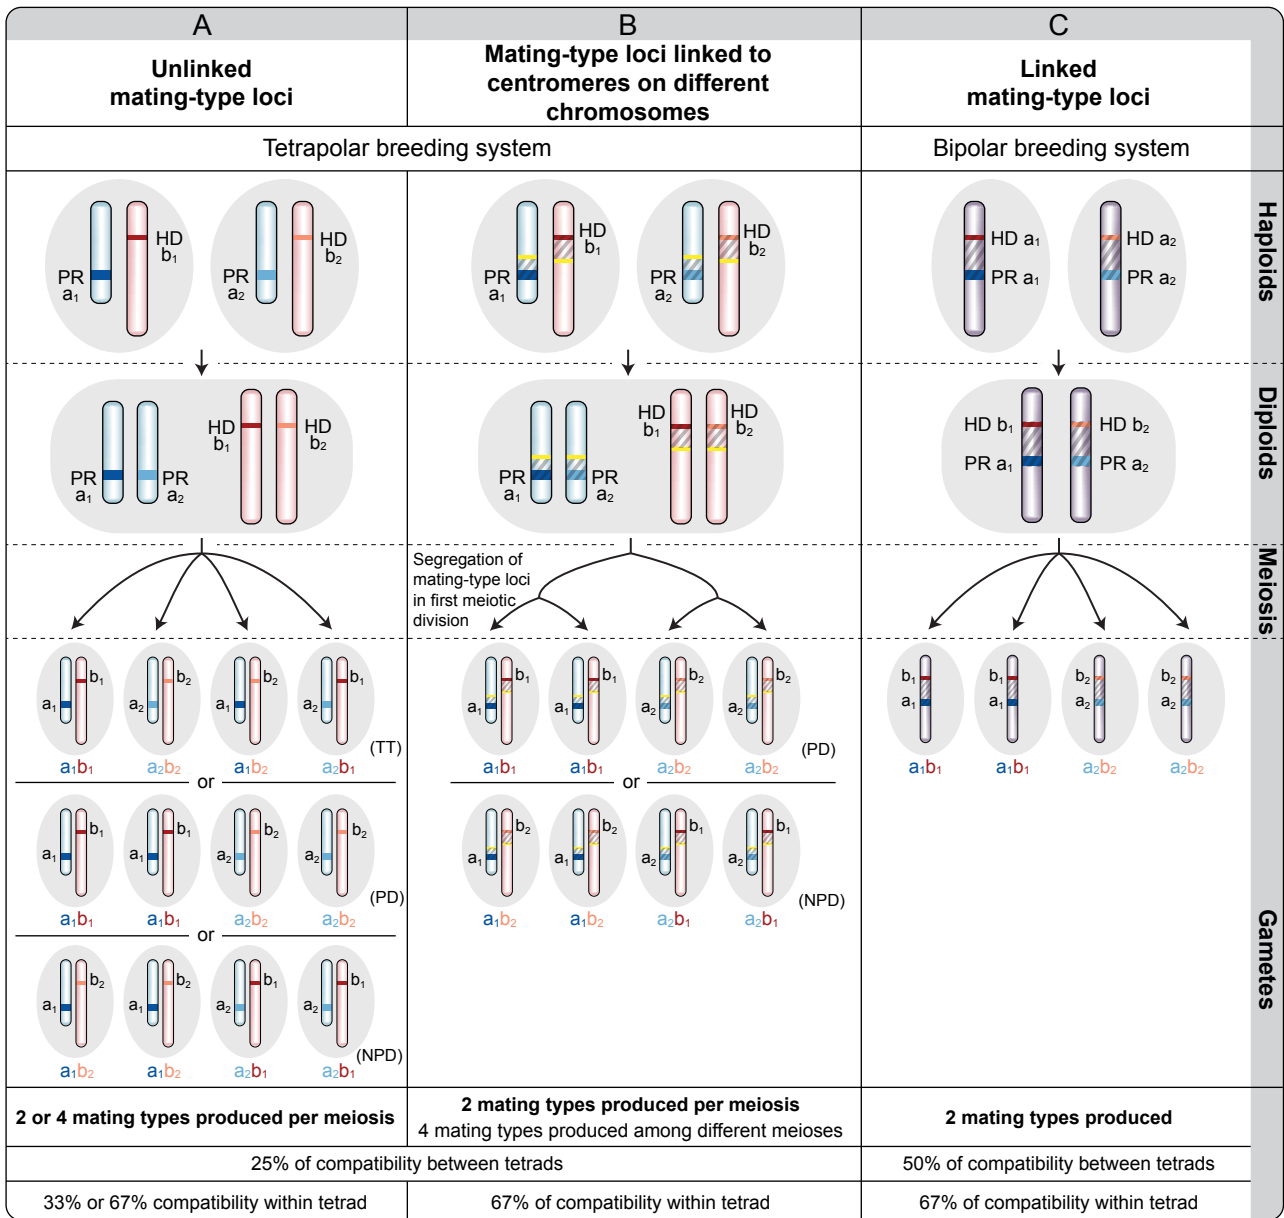

Key: Mating-type loci  


**Fig. S2. Odds of compatibility among gametes of a diploid individual in basidiomycete fungi.** Gametes are fully compatible only if they carry different alleles at both mating-type loci, i.e., the PR (including pheromone receptor and pheromone genes, with  $a_1$  and  $a_2$  alleles) and HD (including homeodomain genes, with  $b_1$  and  $b_2$  alleles) loci. (A) Under tetrapolarity with PR and HD mating-type loci unlinked from each other and from the centromeres (shown here located in different chromosomes, blue and red, respectively), the percentage of compatibility of a given gamete among the other gametes produced by the same diploid individual is 25% across multiple meioses (a given gamete is compatible with one of every four gametes), and the percentage is 33% within tetrad (a given gamete is compatible with one of the other three gametes in the tetrad) or 67% (a given gamete is compatible with two of the three remaining gametes in the tetrad) depending on segregation of the mating type alleles. The different types of gametes produced are tetratypes (TT), parental ditypes (PD) or non-parental ditypes (NPD), which depends on allele segregation and on whether a crossing-over occurred between one of the two loci and the centromere. (B) Under tetrapolarity with PR and HD mating-type genes linked to the centromeres of different chromosomes (blue and red, respectively), the percentage of compatibility of a given gamete among the other gametes produced by the same diploid individual is 25% across multiple meioses but 67% within a tetrad (a given gamete is compatible with two of the three other gametes in the tetrad) due to the segregation of the variation occurring only at meiosis I for both mating type loci. The different types of gametes produced are parental ditypes (PD) or non-parental ditypes (NPD), which depends on segregation. (C) Under bipolarity, i.e., with HD and PR loci fully linked to each other on the same chromosome, the percentage of compatibility of a given gamete among the other gametes produced by the same diploid individual is 50% across multiple meioses (a given gamete is compatible with two of every four gametes), and 67% within a single meiotic tetrad (a given gamete is compatible with two of the three other gametes in the tetrad).

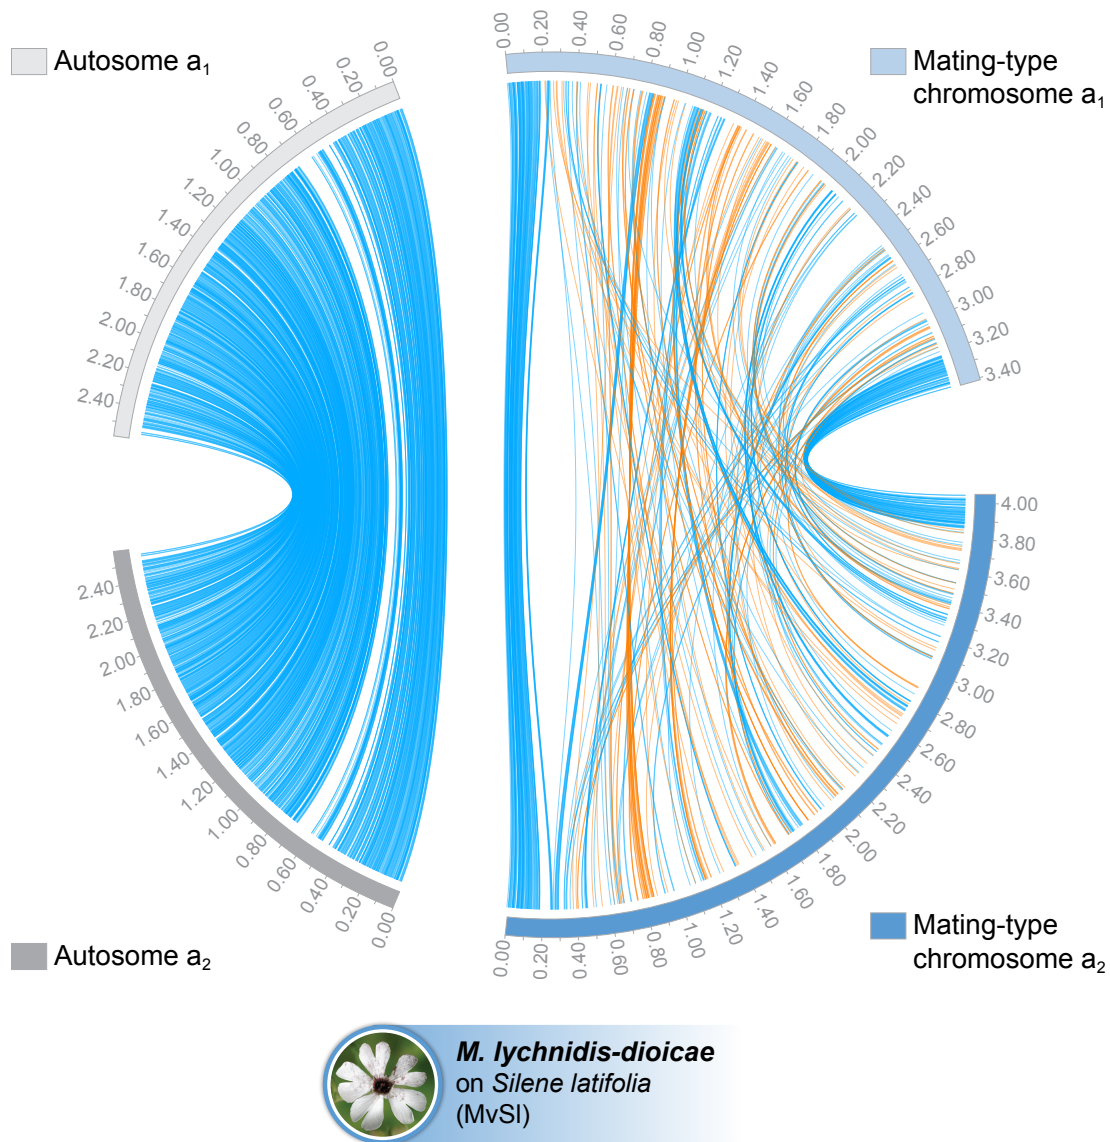

**Fig. S3. Comparison of gene order between *Microbotryum lychnidis-dioicae* chromosomes.**  $a_1$  (top) and  $a_2$  (bottom) mating chromosomes of *M. lychnidis-dioicae*; an autosome pair is shown at the left and the mating-type chromosomes at the right. Blue and orange lines link regions with collinearity across > 5 kb, with the orange links corresponding to inversions. The genomic regions without links correspond to highly rearranged regions. The recombining regions (the autosome and the pseudo-autosomal regions, PARs) are highly collinear between  $a_1$  and  $a_2$  chromosomes, despite a highly selfing mating system, while the non-recombining region on the mating-type chromosome is highly rearranged.

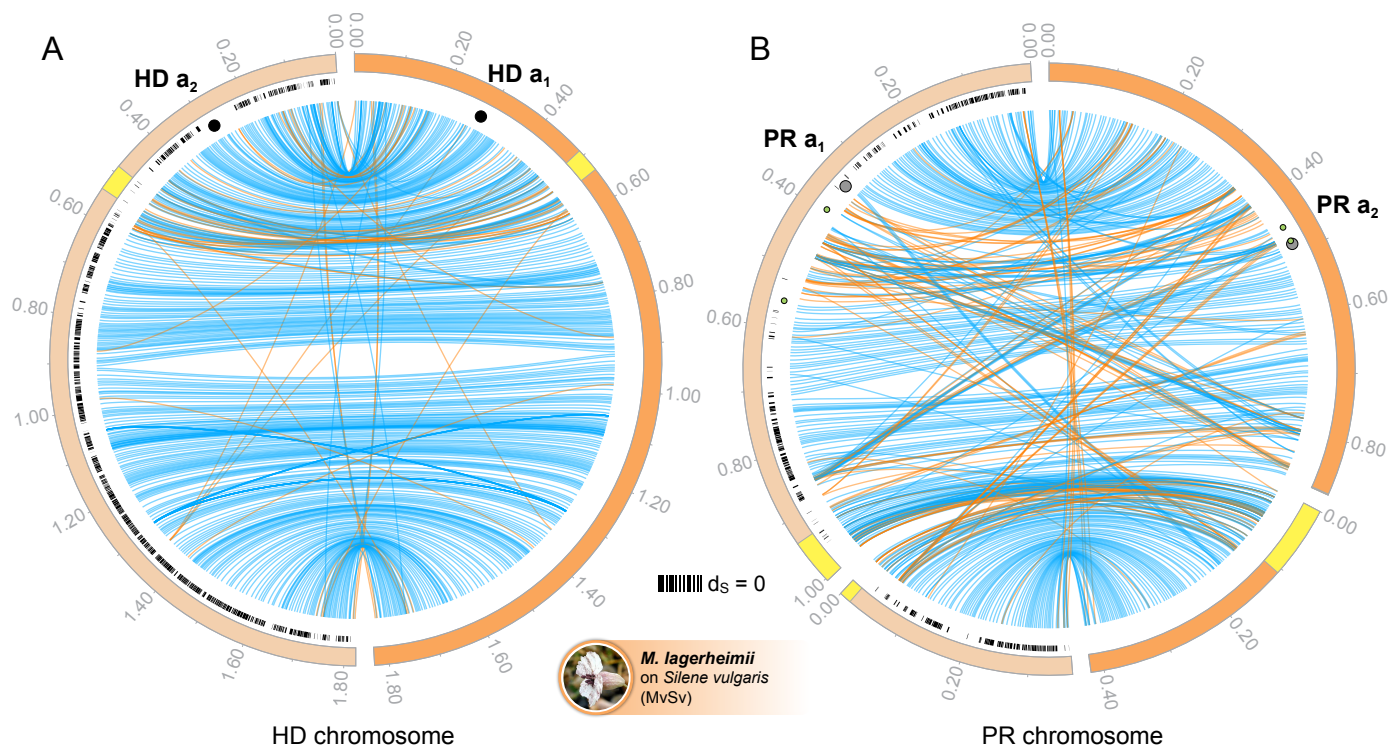

**Fig. S4. Synteny between a<sub>1</sub> and a<sub>2</sub> mating-type chromosomes of *Microbotryum lagerheimii*.** The homeodomain (HD) mating-type chromosomes are displayed in the left circle and the pheromone receptor (PR) mating-type chromosomes in the right circle. The HD genes are indicated by black circles, the pheromone receptor gene by grey circles and the two pheromone genes by small green circles. Blue and orange lines link regions with collinearity across > 1 kb, with the orange links corresponding to inversions. The genomic region between the pheromone receptor and pheromone genes in the a<sub>1</sub> mating-type chromosomes is rearranged compared to the a<sub>2</sub> mating-type chromosomes. Black marks along the contig circles indicate genes with no synonymous differentiation between a<sub>1</sub> and a<sub>2</sub> alleles within the sequenced individual (d<sub>s</sub> = 0). Yellow regions on the outer track indicate centromere-specific repeats (12).

A

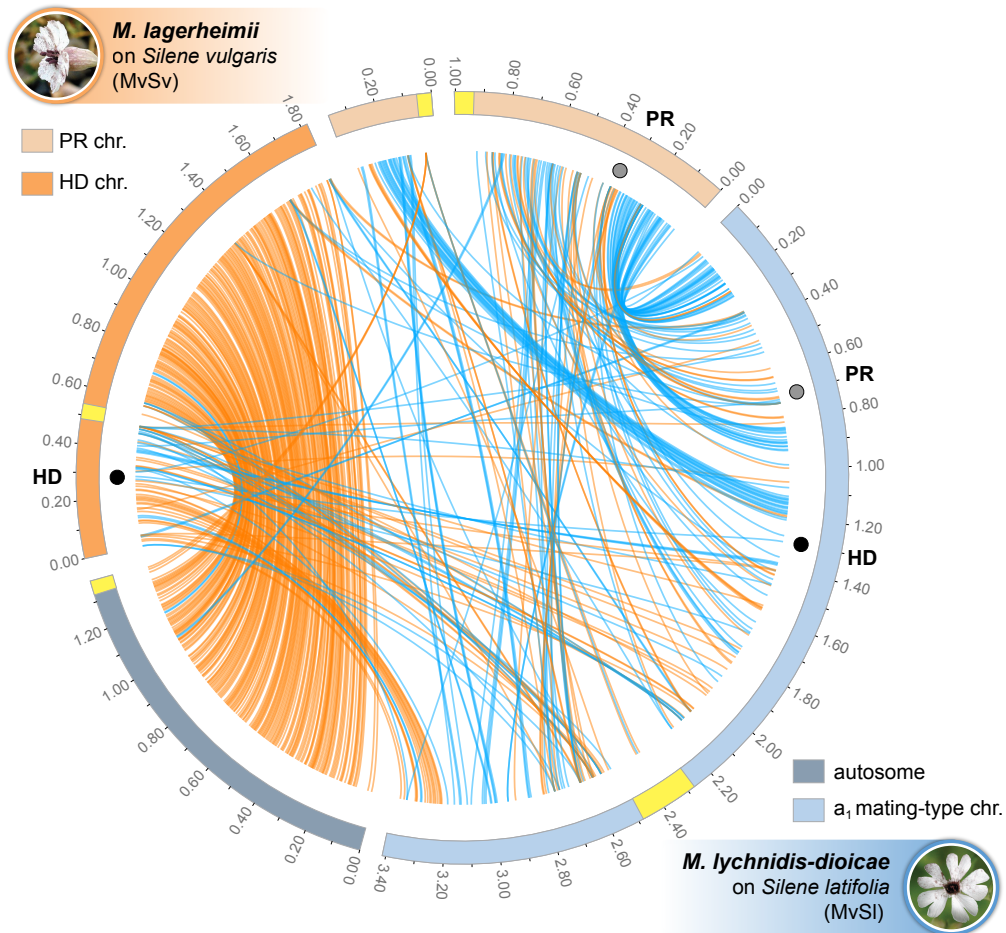

**Fig. S5. Comparison of gene order between mating-type chromosomes.** In all panels (A-E), the outer tracks illustrate assembled chromosomes/contigs and are color coded by species as in Fig. 1. The positions of HD and PR genes are indicated by the black and grey small circles, respectively. Yellow regions on the outer track indicate the centromere-specific repeats (12) and, when represented, red (“R”) and green (“G”) regions indicate the genomic location of the red and green genes as described in Fig. 4B. **(A)** Comparison between the a<sub>1</sub> mating-type chromosomes (chr.) of *Microbotryum lagerheimii* (orange contigs, with light orange for the PR mating-type chromosome and dark orange for the HD mating-type chromosome) and the mating-type chromosome of *M. lychnidis-dioicae* (light blue contig), as well as an autosomal contig of *M. lychnidis-dioicae* (dark blue contig). Blue and orange lines link regions with collinearity across > 2 kb, with orange corresponding to inversions. Genomic regions without links correspond to highly rearranged regions.

B

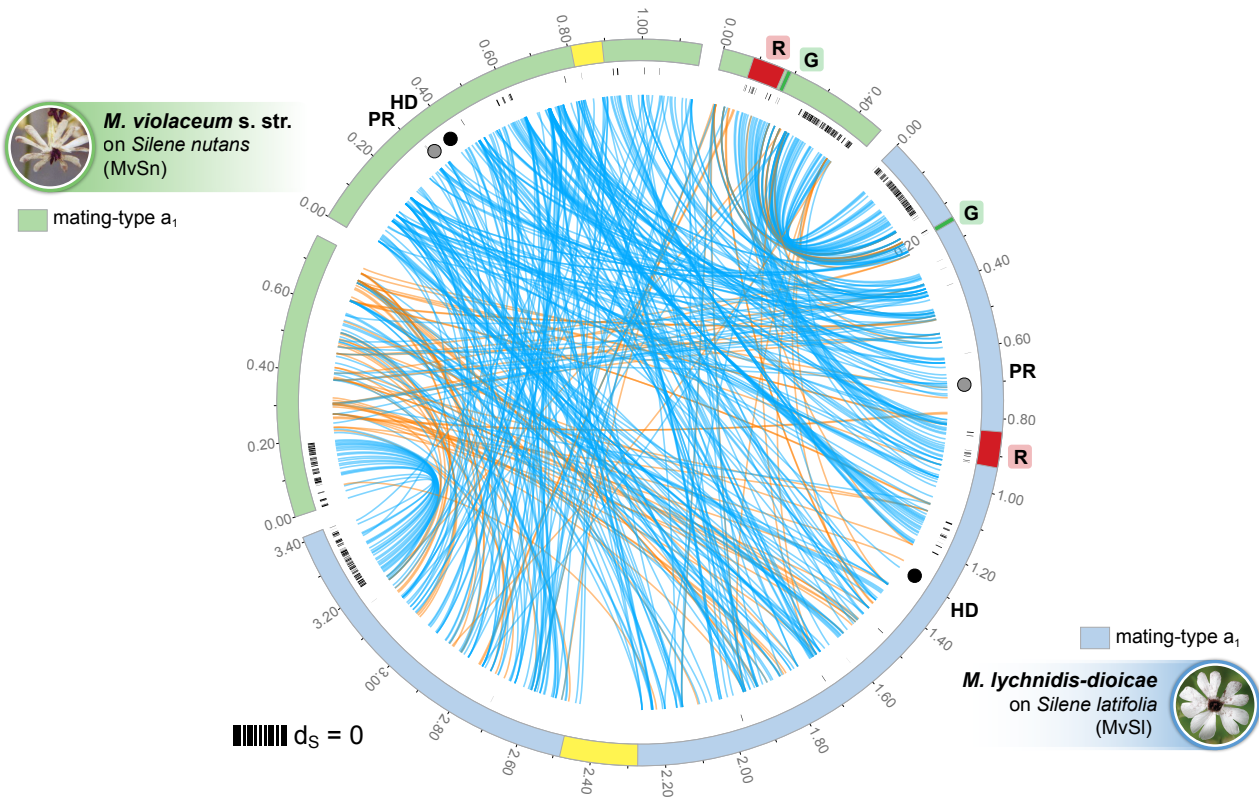

C

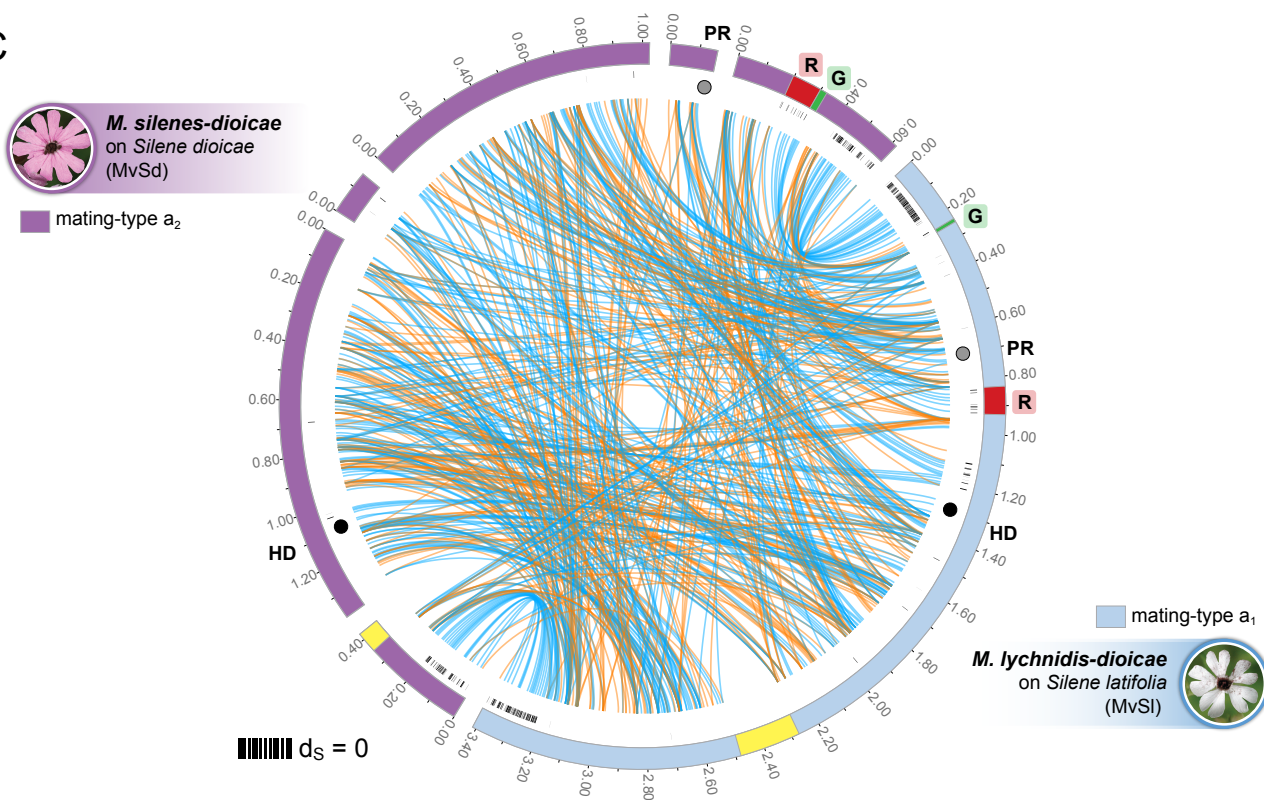

**Fig. S5.** Continued. **(B)** Comparison of  $a_1$  mating-type chromosomes of *Microbotryum lychnidis-dioicae* (right, light blue contig) and *M. violaceum s. str.* (left, light green contigs). It should be noted that the orientation of the central contig in the  $a_1$  *M. violaceum s. str.* mating-type chromosome could not be assessed, so all its links were drawn blue. The black marks along the contig circle indicate genes that have no synonymous substitution between  $a_1$  and  $a_2$  alleles ( $d_s = 0$ ) in *M. lychnidis-dioicae*. **(C)** Comparison between the  $a_1$  mating-type chromosomes of *M. silenes-dioicae* (dark purple contigs on the left) and *M. lychnidis-dioicae* (light blue contig on the right). Blue and orange lines link regions with collinearity across > 3 kb, with orange corresponding to inversions (note that the *M. silenes-dioicae* central contigs could not be ordered or oriented). All the remaining features are as described in panel (A).

D

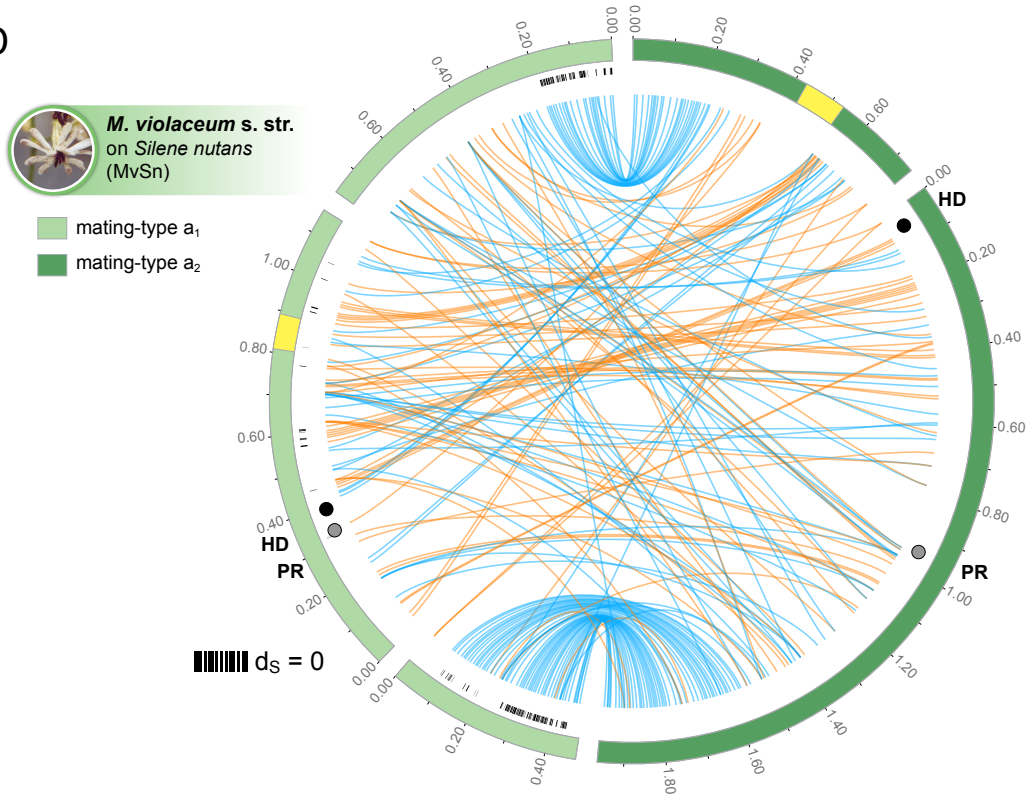

E

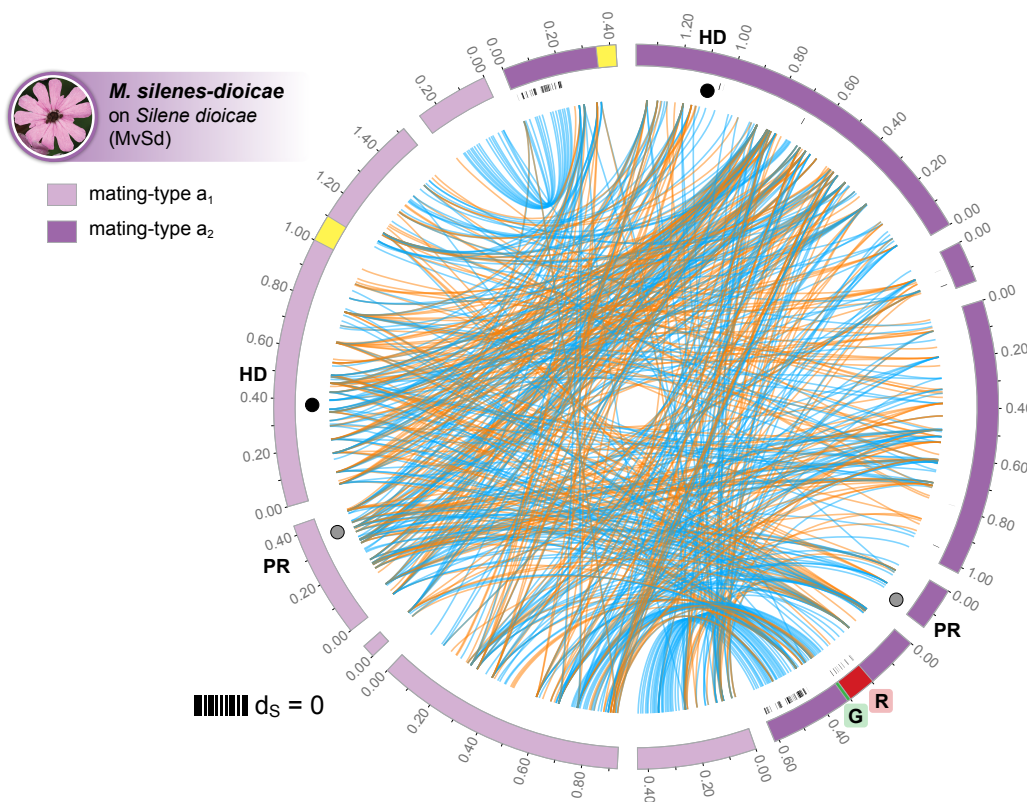

**Fig. S5.** Continued. **(D)** Comparison of  $a_1$  (left, light green) and  $a_2$  (right, dark green) mating-type chromosomes of *M. violaceum* s. *stricto*. Blue and orange lines link regions with collinearity across >3 kb, with orange corresponding to inversions. It should be noted that the orientation of the central contig in the  $a_1$  mating-type chromosome could not be assessed. The black marks along the contig circle indicate the genes with no synonymous substitutions between  $a_1$  and  $a_2$  alleles ( $d_S=0$ ) in *M. violaceum* s. *stricto*. **(E)** Comparison of  $a_1$  (left, light purple) and  $a_2$  (right, dark purple) mating-type chromosomes of *M. silenes-dioicae*. Blue and orange lines link regions with collinearity across >3 kb, with orange corresponding to inversions. Note that the central contigs could not be ordered or oriented. The location of the red (“R”) and green (“G”) genes in Fig. 4B are indicated in the  $a_2$  genome. The black marks along the contig circle indicate the genes with no synonymous substitutions between  $a_1$  and  $a_2$  alleles ( $d_S = 0$ ). The remaining features are as described in panel (A).

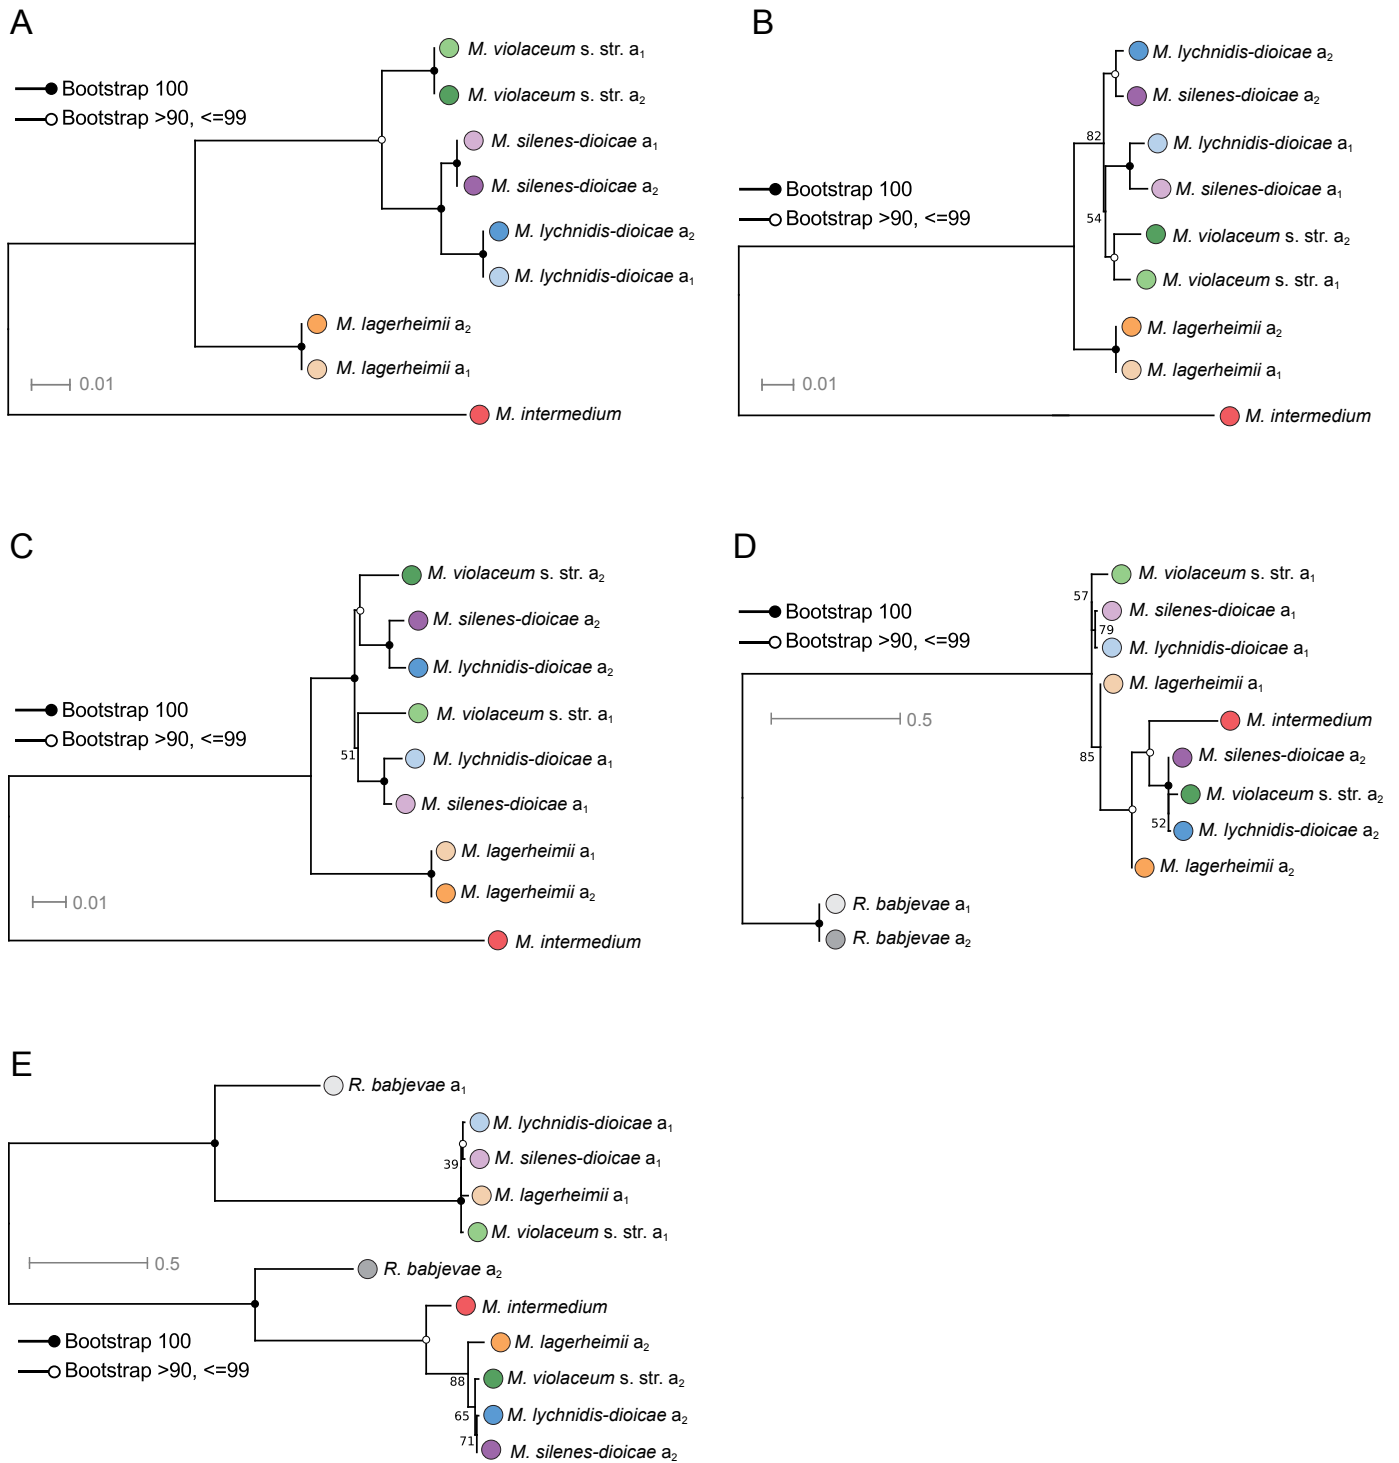

**Fig. S6. Examples of gene genealogies at non-mating type genes showing different levels of trans-specific polymorphism, i.e., with more or less ancient linkage to mating type.** Bootstraps are shown at nodes and the branch length scale is indicated. Strains of the same species are indicated by circles of the same color (a<sub>1</sub>, lighter variant; a<sub>2</sub>, darker variant) and according to Fig. 1. **(A)** No trans-specific polymorphism (orthogroup belonging to the *M. lychnidis-dioicae* PAR). **(B)** Trans-specific polymorphism across *M. lychnidis-dioicae* and *M. silenes-dioicae* (orthogroup belonging to the *M. lychnidis-dioicae* black stratum). **(C)** Trans-specific polymorphism across *M. lychnidis-dioicae*, *M. silenes-dioicae* and *M. violaceum* s. str. (orthogroup belonging to the *M. lychnidis-dioicae* black stratum). **(D)** Trans-specific polymorphism across *M. lychnidis-dioicae*, *M. silenes-dioicae*, *M. violaceum* s. str. and *M. lagerheimii* (orthogroup belonging to the *M. lychnidis-dioicae* PR stratum). **(E)** Trans-specific polymorphism across *M. lychnidis-dioicae*, *M. silenes-dioicae*, *M. violaceum* s. str. *M. lagerheimii* and *Rhodotorula babjevae* (orthogroup belonging to the *M. lychnidis-dioicae* orange stratum).

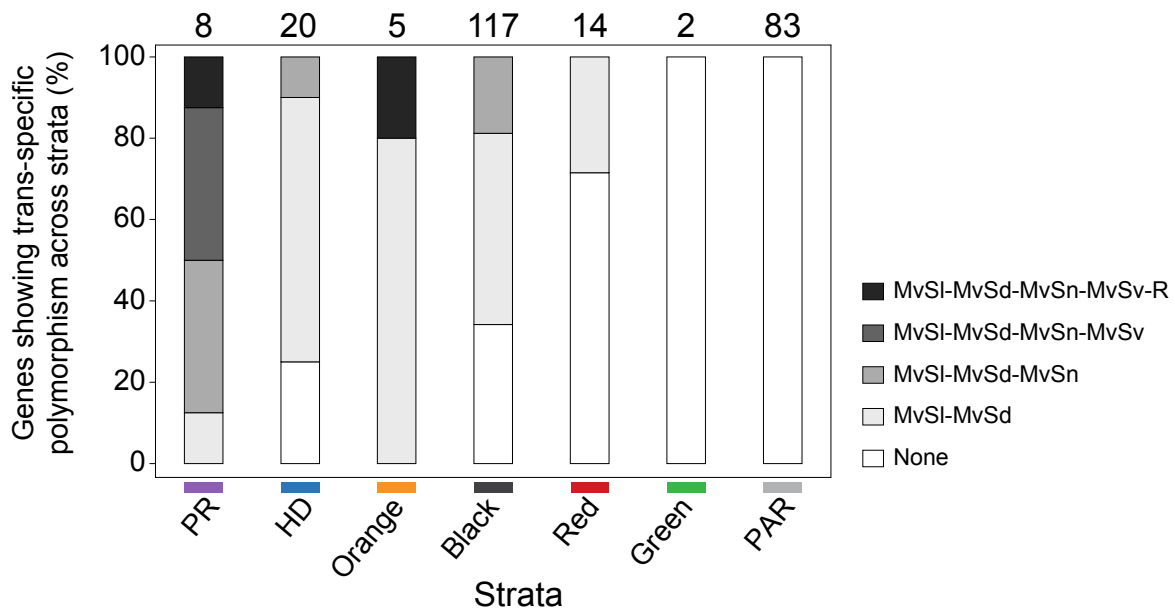

**Fig. S7. Cumulative percentage of genes showing trans-specific polymorphism across strata and age of trans-specific polymorphism relative to speciation events.** Black - single-copy genes with deep trans-specific polymorphism including all species, *M. lychnidis-dioicae* (MvSI), *M. silenes-dioicae* (MvSd), *M. violaceum* s. str. (MvSn), *M. lagerheimii* (MvSv), and even *Rhodotorula babjevae* (R); dark grey - genes showing trans-specific polymorphism including only *M. lychnidis-dioicae*, *M. silenes-dioicae*, *M. violaceum* s. str., and *M. lagerheimii*; grey - genes showing trans-specific polymorphism with only *M. lychnidis-dioicae*, *M. silenes-dioicae* and *M. violaceum* s. str.; light grey - genes with trans-specific polymorphism only between *M. lychnidis-dioicae* and *M. silenes-dioicae*; white - genes with no trans-specific polymorphism. Numbers on the top indicate genes for which gene genealogies with all species and alleles were computed. See Figure S6 for examples of gene genealogies with different levels of trans-specific polymorphism.



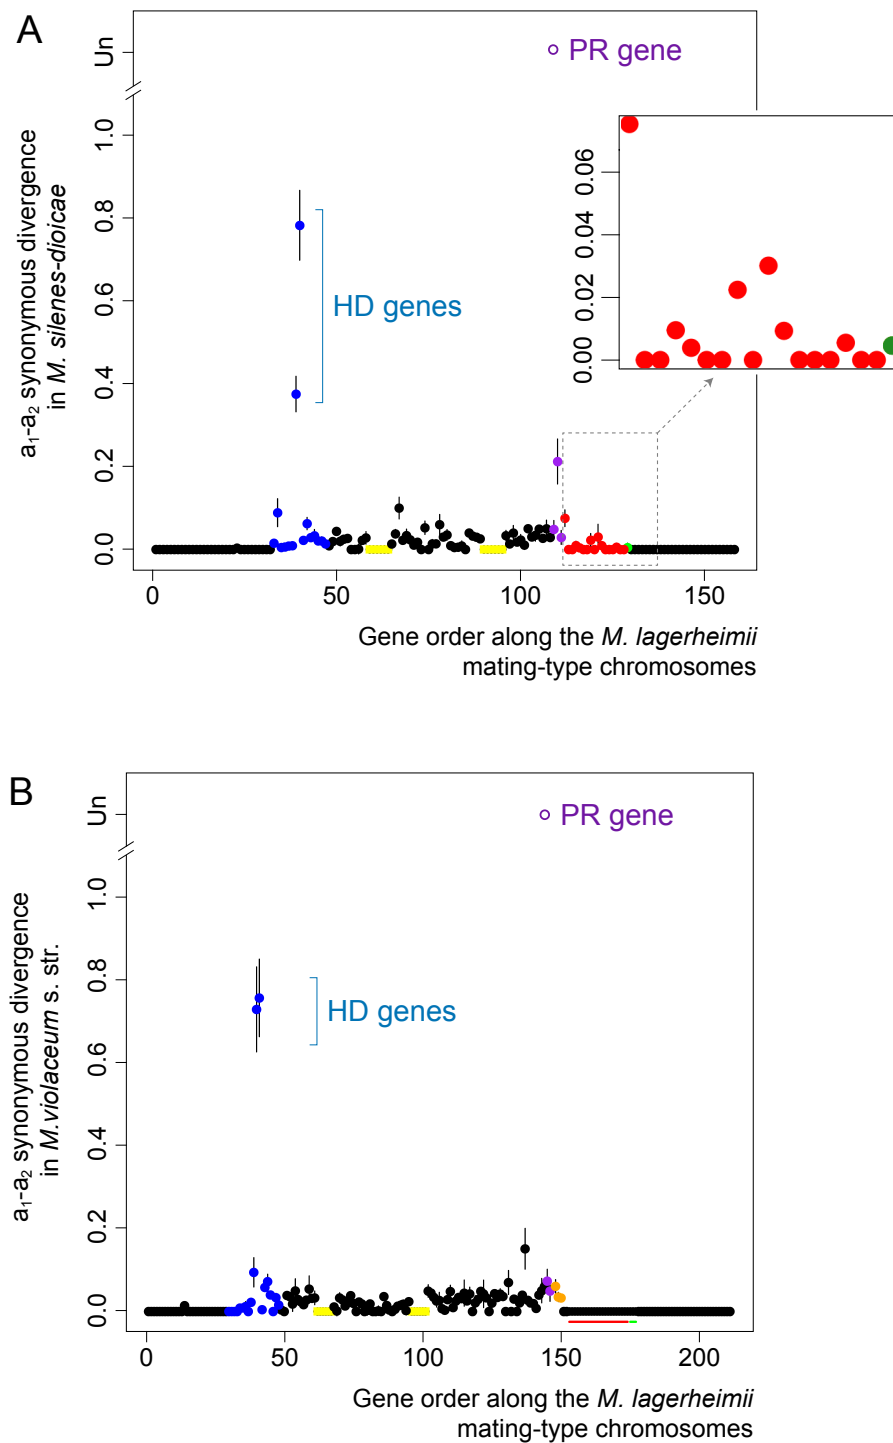

**Fig. S8. Synonymous divergence between alleles associated with  $a_1$  and  $a_2$  mating types in the sequenced diploid individual in each of *Microbotryum silenes-dioicae* and *M. violaceum s. stricto*, plotted along the ancestral gene order.** Synonymous divergence between  $a_1$ - $a_2$  in *M. silenes-dioicae* (A) and *M. violaceum s. str.* (B) plotted in the ancestral genomic coordinates, as inferred from the *M. lagerheimii*  $a_1$  mating-type chromosome. In both panels, points are mean  $d_s$  values per gene and error bars the standard errors. All non-transposable element genes shared by the mating-type chromosomes are depicted. Divergence between the  $a_1$  and  $a_2$  pheromone receptor (PR) was too extensive (54) and could not be computed in both species (it is plotted as an "unalignable" open circle to ease visualization of the various strata). The positions of the inferred ancestral centromeres are indicated by yellow boxes. Genes with non-zero  $d_s$  around the PR and HD mating-type loci within the sequenced individual of *M. lagerheimii* are colored in purple and blue, respectively. More recent putative evolutionary strata in *M. silenes-dioicae* (panel A) are indicated in red and green, and zoomed in on the inset shown on the upper right. In panel (B), the genes belonging to more recent evolutionary strata in *M. silenes-dioicae* and *M. lychnidis-dioicae* are indicated by red and green bars.

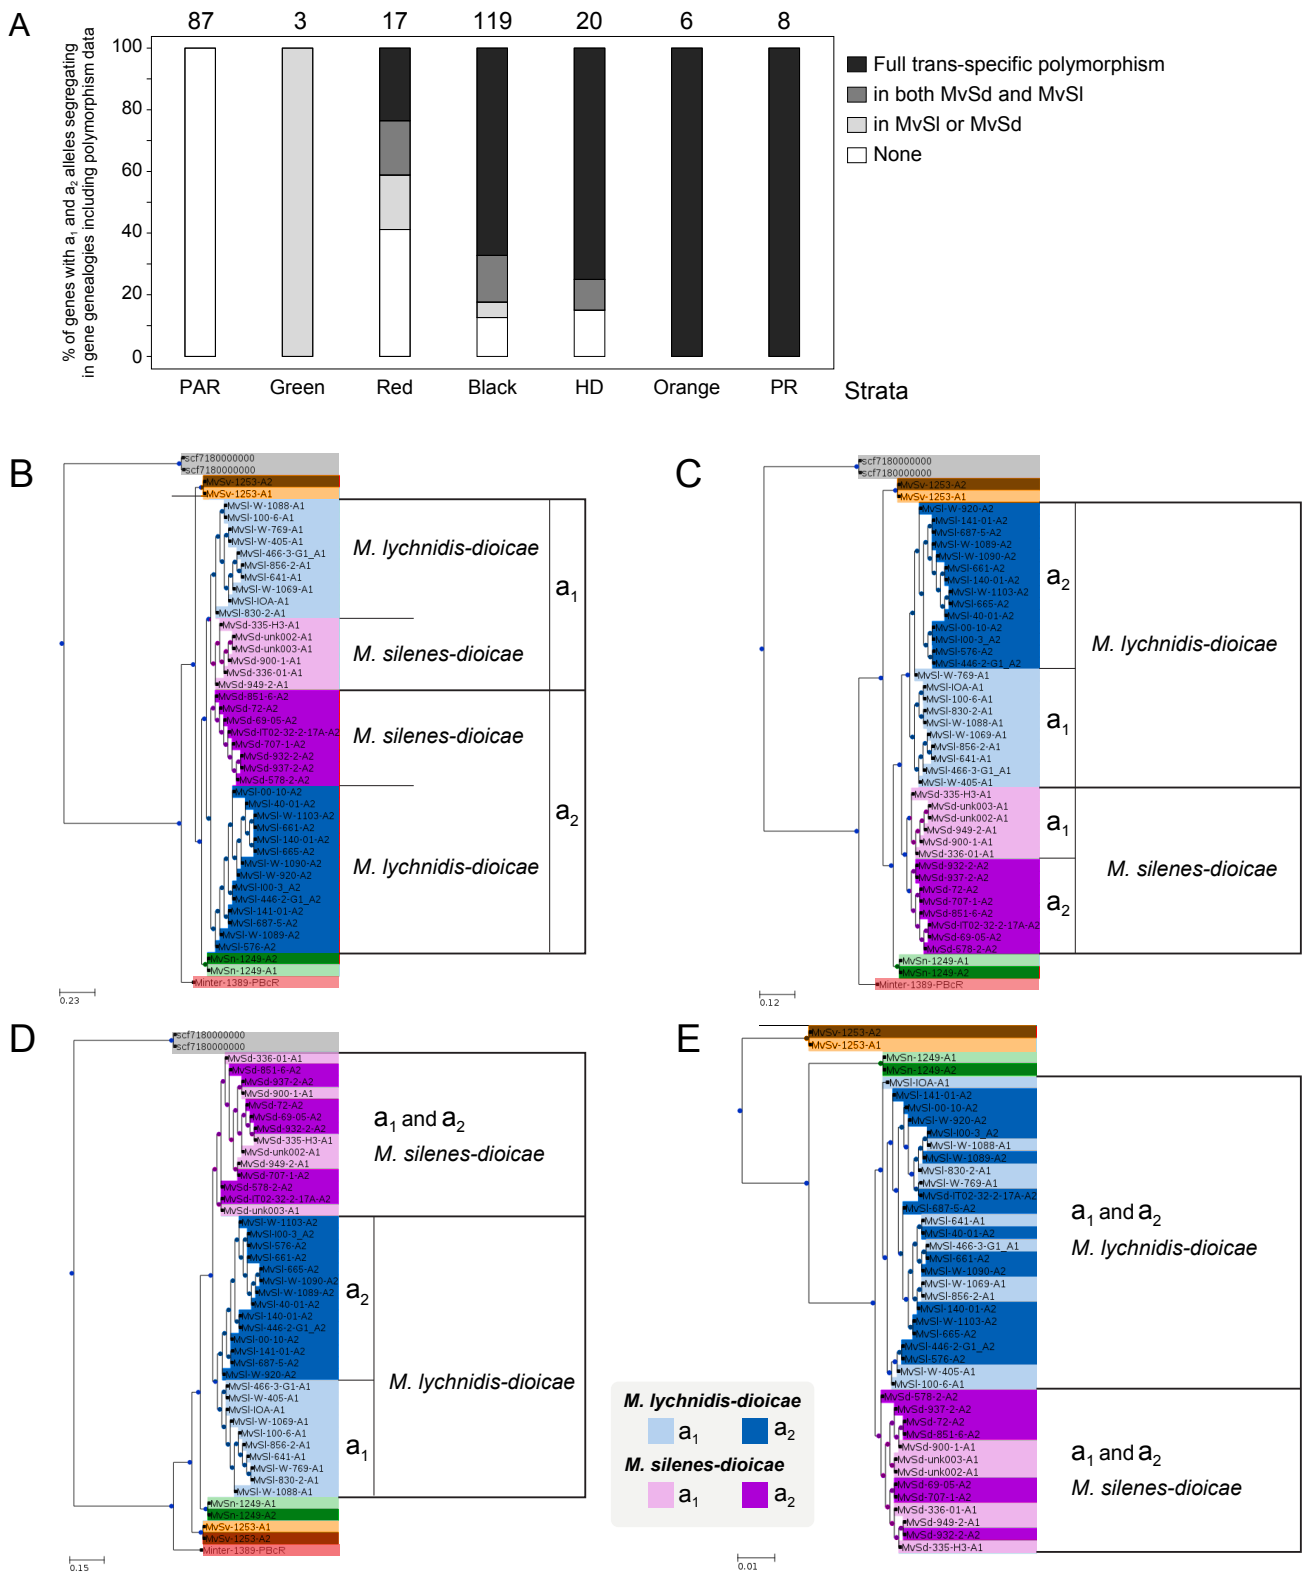

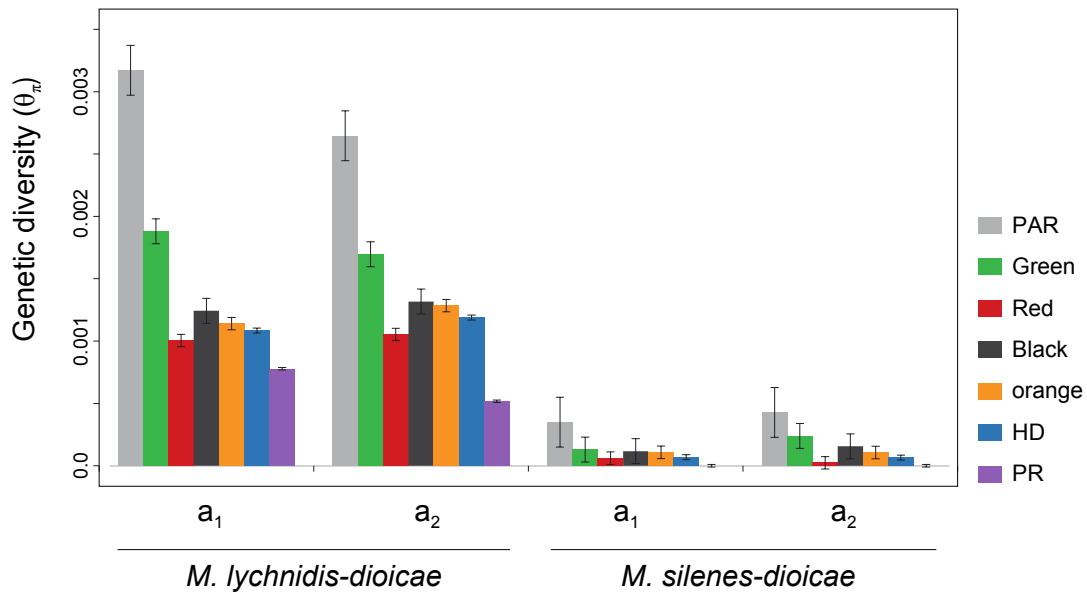

**Fig. S10. *Microbotryum lychnidis-dioicae* and *M. silenes-dioicae* genetic diversity ( $\theta_{\pi}$ ) based on multiple genomes.** Diversity ( $\pm$ SE) was estimated in  $a_1$  or  $a_2$  mating type separately, in the pseudo-autosomal regions (PARs) and the different evolutionary strata (green, red, black, orange, HD-proximal and PR-proximal). *M. silenes-dioicae* is known to display lower genetic diversity than *M. lychnidis-dioicae* (48, 51, 62).

## List of SI Tables

**Table S1.** Synonymous substitution ( $d_s$ ) means within diploid individuals between alleles associated to the  $a_1$  and  $a_2$  mating types for genes in the different putative strata and the pseudo-autosomal regions (PARs), number of genes and estimated dates for recombination suppression.

**Table S2.** Synonymous substitution ( $d_s$ ) between alleles at non-mating-type genes, associated with the  $a_1$  and  $a_2$  mating types, respectively, in three outgroup species for the genes belonging to the purple and blue strata in *Microbotryum lagerheimii*.

**Table S3.** Gene ID and putative function of the genes located in the different evolutionary strata in *Microbotryum lychnidis-dioicae* (MvSI) (shared with *M. lagerheimii* (MvSv) mating-type chromosomes).

**Table S4.** Raw data summary and assembly statistics for the genomes generated in this study.

**Table S5.** *Microbotryum lychnidis-dioicae* and *M. silenes-dioicae* strains used for performing polymorphism analyses.

**Table S6.** Nucleotide diversity ( $\theta_\pi$ ) and divergence (mean number of pairwise differences) estimates in pseudo-autosomal regions and evolutionary strata in *M. lychnidis-dioicae* and *M. silenes-dioicae*.

**Table S7.** Results of maximum-likelihood Hudson-Kreitman-Agade (MLHKA) tests for assessing whether differences in diversity between each evolutionary stratum and the pseudo-autosomal regions (PARs) is due to balancing selection or elevated mutation rates.

**Table S1. Synonymous substitution ( $d_s$ ) means within diploid individuals between alleles associated to the a1 and a2 mating types for genes in the different putative strata and the pseudo-autosomal regions (PARs), number of genes and estimated dates for recombination suppression.** Mean  $d_s$  and standard error (SE) across genes between the large putative strata, numbered in their presumed order of origin of suppressed recombination, whether they involve mating-type genes, the *Microbotryum* species in which recombination is suppressed in these strata, the estimated date of recombination suppression in strata where inference was possible, and number of genes ancestrally in *M. lychnidis-dioicae* in the strata (many genes have been lost from one or the other mating types following recombination suppression).

| Stratum order | Stratum                                    | Mean $d_s \pm SE$ | Involving mating-type genes? | Species in which recombination is suppressed                                                  | Estimated date recombination suppression | Number of genes ancestrally in <i>M. lychnidis-dioicae</i> |
|---------------|--------------------------------------------|-------------------|------------------------------|-----------------------------------------------------------------------------------------------|------------------------------------------|------------------------------------------------------------|
| 1             | PR mating-type gene                        | Not alignable     | Yes                          | All species                                                                                   | 370 MYA (54)                             | 3                                                          |
| 2             | HD mating-type genes                       | $0.62 \pm 0.326$  | Yes                          | All species                                                                                   |                                          | 2                                                          |
| 3             | PR-proximal genes (purple)                 | $0.112 \pm 0.040$ | No                           | All species                                                                                   | 2.1 MYA                                  | 31                                                         |
| 4             | HD-proximal genes (blue)                   | $0.103 \pm 0.045$ | No                           | All species                                                                                   |                                          | 14                                                         |
| 5             | Black (linking PR and HD mating-type loci) | $0.032 \pm 0.002$ | Yes                          | <i>M. lychnidis-dioicae</i> ,<br><i>M. silenes-dioicae</i> and<br><i>M. violaceum s. str.</i> | 1.3 MYA                                  | 85                                                         |
| 6             | Orange                                     | $0.052 \pm 0.015$ | No                           | <i>M. lychnidis-dioicae</i> ,<br><i>M. silenes-dioicae</i> and<br><i>M. violaceum s. str.</i> |                                          | 7                                                          |
| 7             | Red                                        | $0.018 \pm 0.049$ | No                           | <i>M. lychnidis-dioicae</i><br>and <i>M. silenes-dioicae</i>                                  | 0.9 MYA                                  | 22                                                         |
| 8             | Green                                      | $0.004 \pm 0.003$ | No                           | <i>M. lychnidis-dioicae</i><br>and <i>M. silenes-dioicae</i>                                  |                                          | 3                                                          |
|               | pPAR (from the ancestral HD chromosome)    | <0.0001           | No                           | None                                                                                          |                                          | 73                                                         |
|               | qPAR (from the ancestral PR chromosome)    | <0.0001           | No                           | None                                                                                          |                                          | 80                                                         |

**Table S2. Synonymous substitution ( $d_s$ ) between alleles associated with the  $a_1$  and  $a_2$  mating types in three individuals of outgroup species for the genes belonging to the *Microbotryum lagerheimii* purple and blue strata. (A) *Sporobolomyces salmonicolor* (Ss) strains CBS 6832 vs. ML 2241; (B) *Rhodotorula toruloides* (Rt) strains JCM 10020 (A1B1) vs. JCM 10021 (A2B1); (C) *Leucosporidium scottii* (Ls) strains CBS 5930 vs. CBS 5931. The ID of the query gene from the reference *M. lychnidis-dioicae* genome, the ID in the outgroup genome, the  $d_s$  value and the putative function inferred from similarity are given. The only functions associated with mating or mating-type functions are the mating-type genes (highlighted in bold). The pheromone receptor genes are not shown as they could not be aligned between mating types.**

(A)

| MvSI-Query ID                   | Paired ID in the outgroup                        | $d_s$         | Functional annotation                                                       |
|---------------------------------|--------------------------------------------------|---------------|-----------------------------------------------------------------------------|
| MvSI-1064-A1-R4_A1g00025        | Ss_CBS6832 g3490.t1;Ss_ML2241 g967.t1            | 0.0253        | glycoside hydrolase family 28 protein                                       |
| MvSI-1064-A1-R4_A1g00175        | Ss_CBS6832 g4453.t1;Ss_ML2241 g4966.t1           | 0.0177        | ABC1-A atypical protein kinase                                              |
| MvSI-1064-A1-R4_A1g00230        | Ss_CBS6832 g4436.t1;Ss_ML2241 g4982.t1           | 0.0045        | ASF1-like histone chaperone                                                 |
| MvSI-1064-A1-R4_A1g00478        | Ss_CBS6832 g2690.t1;Ss_ML2241 g5108.t1           | 0.0167        | protein disulfide-isomerase                                                 |
| MvSI-1064-A1-R4_A1g00495        | Ss_CBS6832 g6519.t1;Ss_ML2241 g6611.t1           | 0.0232        | nucleotide-binding protein/RRM_SF                                           |
| <b>MvSI-1064-A1-R4_A1g00591</b> | <b>Ss_CBS6832 g5519.t1;Ss_ML2241 g1781.t1</b>    | <b>0.3037</b> | <b>homeodomain transcription factor HD1</b>                                 |
| <b>MvSI-1064-A1-R4_A1g00592</b> | <b>Ss_CBS6832 g5518.t1;Ss_ML2241 g1780.t1</b>    | <b>0.3041</b> | <b>homeodomain transcription factor HD2</b>                                 |
| MvSI-1064-A1-R4_A1g00593        | Ss_CBS6832 g2692.t1;Ss_ML2241 g5106.t1           | 0.0223        | 5'-3' exoribonuclease 2                                                     |
| MvSI-1064-A1-R4_A1g00659        | Ss_CBS6832 g307.t1;Ss_ML2241 g1640.t1            | 0.0285        | alpha-mannosyltransferase, glycosyltransferase family 71 protein            |
| MvSI-1064-A1-R4_A1g00726        | Ss_CBS6832 g4454.t1;Ss_ML2241 g4962.t1           | 0.0173        | defective in Cullin neddylation protein 1/UBA_like_SF                       |
| MvSI-1064-A1-R4_A1g00772        | Ss_CBS6832 g2693.t1;Ss_ML2241 g5105.t1           | 0.0260        | U3 snoRNP-associated protein Esf2 / RRM_ABT1_like                           |
| MvSI-1064-A1-R4_A1g00800        | Ss_CBS6832 g2586.t1 corr;Ss_ML2241 g6295.t1 corr | 0.0368        | S-(hydroxymethyl)glutathione dehydrogenase / alcohol dehydrogenase          |
| MvSI-1064-A1-R4_A1g00801        | Ss_CBS6832 g6218.t1;Ss_ML2241 g6054.t1           | 0.0308        | exosome complex protein LRP1                                                |
| MvSI-1064-A1-R4_A1g00844        | Ss_CBS6832 g3596.t1;Ss_ML2241 g741.t1            | 0.0609        | hypothetical protein                                                        |
| MvSI-1064-A1-R4_A1g00854        | Ss_CBS6832 g4447.t1;Ss_ML2241 g4977.t1           | 0.0555        | karyopherin kap95                                                           |
| MvSI-1064-A1-R4_A1g00970        | Ss_CBS6832 g2670.t1;Ss_ML2241 g3808.t1           | 0.0287        | T-complex protein 1 subunit beta                                            |
| MvSI-1064-A1-R4_A1g00971        | Ss_CBS6832 g2640.t1;Ss_ML2241 g6034.t1           | 0.0593        | dolichylidiphosphatase / PAP2_like                                          |
| MvSI-1064-A1-R4_A1g00972        | Ss_CBS6832 g2641.t1;Ss_ML2241 g6035.t1           | 0.0449        | hypothetical protein                                                        |
| MvSI-1064-A1-R4_A1g00997        | Ss_CBS6832 g3124.t1;Ss_ML2241 g781.t1            | 0.0024        | hypothetical protein                                                        |
| MvSI-1064-A1-R4_A1g00998        | Ss_CBS6832 g2641.t1 corr;Ss_ML2241 g6036.t1 corr | 0.0293        | U3 small nucleolar ribonucleoprotein IMP3 / Ribosomal protein S4/S9         |
| MvSI-1064-A1-R4_A1g01017        | Ss_CBS6832 g4458.t1;Ss_ML2241 g4960.t1           | 0.0349        | phosphatidylethanolamine N-methyltransferase (PEMT)                         |
| MvSI-1064-A1-R4_A1g01154        | Ss_CBS6832 g2758.t1;Ss_ML2241 g2001.t1           | 0.0684        | ribosomal protein L1                                                        |
| MvSI-1064-A1-R4_A1g01159        | Ss_CBS6832 g5531.t1;Ss_ML2241 g1794.t1           | 0.0478        | bZIP transcription factor (AP-1)                                            |
| MvSI-1064-A1-R4_A1g01160        | Ss_CBS6832 g2542.t1;Ss_ML2241 g1752.t1           | 0.0300        | COP9 signalosome complex subunit 2                                          |
| MvSI-1064-A1-R4_A1g01161        | Ss_CBS6832 g2659.t1;Ss_ML2241 g3820.t1           | 0.0212        | mitochondrial carrier protein                                               |
| MvSI-1064-A1-R4_A1g01162        | Ss_CBS6832 g5512.t1;Ss_ML2241 g1774.t1           | 0.0186        | hypothetical protein                                                        |
| MvSI-1064-A1-R4_A1g01163        | Ss_CBS6832 g2660.t1;Ss_ML2241 g3819.t1           | 0.0627        | ADP-ribosylation factor-like protein 2                                      |
| MvSI-1064-A1-R4_A1g01388        | Ss_CBS6832 g1143.t1;Ss_ML2241 g6591.t1           | 0.0183        | ribosome assembly protein Noc2                                              |
| MvSI-1064-A1-R4_A1g01440        | Ss_CBS6832 g2708.t1;Ss_ML2241 g5917.t1           | 0.0458        | autophagy-related protein 7 / E1-like protein-activating enzyme Gsa7p/Apg7p |
| MvSI-1064-A1-R4_A1g01441        | Ss_CBS6832 g2773.t1;Ss_ML2241 g1987.t1           | 0.0234        | zinc finger, C3HC4 RING-type protein                                        |
| MvSI-1064-A1-R4_A1g01457        | Ss_CBS6832 g2652.t1;Ss_ML2241 g3827.t1           | 0.0269        | unnamed protein product                                                     |
| MvSI-1064-A1-R4_A1g01458        | Ss_CBS6832 g2652.t1;Ss_ML2241 g3827.t1           | 0.0269        | DNA-directed RNA polymerase III subunit RPC1                                |

**Table S2.** Continued.

(B)

| MvSI-Query ID                   | Paired ID in the outgroup                        | dS           | Functional annotation                                                       |
|---------------------------------|--------------------------------------------------|--------------|-----------------------------------------------------------------------------|
| MvSI-1064-A1-R4_A1g00175        | Rt_JCM10020_06889-R1;Rt_JCM10021_05528-R1        | 0.338        | ABC1-A atypical protein kinase                                              |
| MvSI-1064-A1-R4_A1g00230        | Rt_JCM10020_06874-R1;Rt_JCM10021_05544-R1        | 0.382        | ASF1-like histone chaperone                                                 |
| MvSI-1064-A1-R4_A1g00478        | Rt_JCM10020_01934-R1;Rt_JCM10021_07790-R1        | 0.618        | protein disulfide-isomerase                                                 |
| MvSI-1064-A1-R4_A1g00495        | Rt_JCM10020_01942-R1;Rt_JCM10021_02138-R1        | 0.363        | nucleotide-binding protein/RRM_SF                                           |
| <b>MvSI-1064-A1-R4_A1g00591</b> | <b>Rt_JCM10020_02036-R1;Rt_JCM10021_02036-R1</b> | <b>0.692</b> | <b>homeodomain transcription factor HD1</b>                                 |
| <b>MvSI-1064-A1-R4_A1g00592</b> | <b>Rt_JCM10020_02035-R1;Rt_JCM10021_02037-R1</b> | <b>0.648</b> | <b>homeodomain transcription factor HD2</b>                                 |
| MvSI-1064-A1-R4_A1g00593        | Rt_JCM10020_01962-R1;Rt_JCM10021_02108-R1        | 0.423        | 5'-3' exoribonuclease 2                                                     |
| MvSI-1064-A1-R4_A1g00659        | Rt_JCM10020_01652-R1;Rt_JCM10021_00547-R1        | 0.357        | alpha-mannosyltransferase, glycosyltransferase family 71 protein            |
| MvSI-1064-A1-R4_A1g00726        | Rt_JCM10020_06891-R1;Rt_JCM10021_05538-R1        | 0.210        | defective in Cullin neddylation protein 1/UBA_like_SF                       |
| MvSI-1064-A1-R4_A1g00772        | Rt_JCM10020_01963-R1;Rt_JCM10021_02107-R1        | 0.554        | U3 snoRNP-associated protein Esf2 / RRM_ABT1_like                           |
| MvSI-1064-A1-R4_A1g00800        | Rt_JCM10020_02223-R1;Rt_JCM10021_01846-R1        | 0.361        | S-(hydroxymethyl)glutathione dehydrogenase / alcohol dehydrogenase          |
| MvSI-1064-A1-R4_A1g00801        | Rt_JCM10020_01998-R1;Rt_JCM10021_02076-R1        | 0.334        | exosome complex protein LRP1                                                |
| MvSI-1064-A1-R4_A1g00854        | Rt_JCM10020_06883-R1;Rt_JCM10021_05536-R1        | 0.195        | karyopherin kap95                                                           |
| MvSI-1064-A1-R4_A1g00970        | Rt_JCM10020_02405-R1;Rt_JCM10021_03563-R1        | 0.472        | T-complex protein 1 subunit beta                                            |
| MvSI-1064-A1-R4_A1g00971        | Rt_JCM10020_02275-R1;Rt_JCM10021_01791-R1        | 0.442        | dolichyldiphosphatase / PAP2_like                                           |
| MvSI-1064-A1-R4_A1g00972        | Rt_JCM10020_02276-R1;Rt_JCM10021_01790-R1        | 0.367        | hypothetical protein                                                        |
| MvSI-1064-A1-R4_A1g00997        | Rt_JCM10020_04030-R1;Rt_JCM10021_02518-R1        | 0.423        | hypothetical protein                                                        |
| MvSI-1064-A1-R4_A1g00998        | Rt_JCM10020_02282-R1;Rt_JCM10021_01784-R1        | 0.496        | U3 small nucleolar ribonucleoprotein IMP3 / Ribosomal protein S4/S9         |
| MvSI-1064-A1-R4_A1g01017        | Rt_JCM10020_06899-R1;Rt_JCM10021_05518-R1        | 0.523        | phosphatidylethanolamine N-methyltransferase (PEMT)                         |
| MvSI-1064-A1-R4_A1g01154        | Rt_JCM10020_02129-R1;Rt_JCM10021_01938-R1        | 0.223        | ribosomal protein L1                                                        |
| MvSI-1064-A1-R4_A1g01159        | Rt_JCM10020_02186-R1;Rt_JCM10021_01883-R1        | 0.270        | bZIP transcription factor (AP-1)                                            |
| MvSI-1064-A1-R4_A1g01160        | Rt_JCM10020_02367-R1;Rt_JCM10021_03528-R1        | 0.537        | COP9 signalosome complex subunit 2                                          |
| MvSI-1064-A1-R4_A1g01161        | Rt_JCM10020_02382-R1;Rt_JCM10021_03542-R1        | 0.334        | mitochondrial carrier protein                                               |
| MvSI-1064-A1-R4_A1g01162        | Rt_JCM10020_02317-R1;Rt_JCM10021_01748-R1        | 0.370        | hypothetical protein                                                        |
| MvSI-1064-A1-R4_A1g01163        | Rt_JCM10020_02358-R1;Rt_JCM10021_01709-R1        | 0.425        | ADP-ribosylation factor-like protein 2                                      |
| MvSI-1064-A1-R4_A1g01388        | Rt_JCM10020_04617-R1;Rt_JCM10021_04683-R1        | 0.394        | ribosome assembly protein Noc2                                              |
| MvSI-1064-A1-R4_A1g01440        | Rt_JCM10020_05792-R1;Rt_JCM10021_07432-R1        | 0.565        | autophagy-related protein 7 / E1-like protein-activating enzyme Gsa7p/Apg7p |
| MvSI-1064-A1-R4_A1g01441        | Rt_JCM10020_02100-R1;Rt_JCM10021_01969-R1        | 0.380        | zinc finger, C3HC4 RING-type protein                                        |
| MvSI-1064-A1-R4_A1g01458        | Rt_JCM10020_02343-R1;Rt_JCM10021_01724-R1        | 0.559        | DNA-directed RNA polymerase III subunit RPC1                                |

**Table S2.** Continued.

(C)

| MvSI-Query ID                   | Paired ID in the outgroup                         | dS            | Functional annotation                                                                                                  |
|---------------------------------|---------------------------------------------------|---------------|------------------------------------------------------------------------------------------------------------------------|
| MvSI-1064-A1-R4_A1g00025        | Ls_CBS5930 g7897.t1;Ls_CBS5931 g4047.t1           | 0.0000        | glycoside hydrolase family 28 protein                                                                                  |
| MvSI-1064-A1-R4_A1g00175        | Ls_CBS5930 g8243.t1;Ls_CBS5931 g3668.t1           | 0.0205        | ABC1-A atypical protein kinase                                                                                         |
| MvSI-1064-A1-R4_A1g00230        | Ls_CBS5930 g8248.t1;Ls_CBS5931 g3672.t1           | 0.1701        | ASF1-like histone chaperone                                                                                            |
| MvSI-1064-A1-R4_A1g00478        | Ls_CBS5930 g3772.t1 corr;Ls_CBS5931 g4597.t1 corr | 0.0000        | protein disulfide-isomerase                                                                                            |
| MvSI-1064-A1-R4_A1g00495        | Ls_CBS5930 g3767.t1;Ls_CBS5931 g4602.t1           | 0.0000        | nucleotide-binding protein/RRM_SF                                                                                      |
| <b>MvSI-1064-A1-R4_A1g00591</b> | <b>Ls_CBS5930 g2009.t1;Ls_CBS5931 g4188.t1</b>    | <b>0.5762</b> | <b>homeodomain transcription factor HD1</b>                                                                            |
| <b>MvSI-1064-A1-R4_A1g00592</b> | <b>Ls_CBS5930 g2008.t1;Ls_CBS5931 g4189.t1</b>    | <b>0.5376</b> | <b>homeodomain transcription factor HD2</b>                                                                            |
| MvSI-1064-A1-R4_A1g00593        | Ls_CBS5930 g3769.t1;Ls_CBS5931 g4600.t1           | 0.0000        | 5'-3' exoribonuclease 2                                                                                                |
| MvSI-1064-A1-R4_A1g00659        | Ls_CBS5930 g5144.t1;Ls_CBS5931 g1185.t1           | 0.0117        | alpha-mannosyltransferase, glycosyltransferase family 71 protein defective in Cullin neddylation protein 1/UBA_like_SF |
| MvSI-1064-A1-R4_A1g00726        | Ls_CBS5930 g3411.t1;Ls_CBS5931 g3664.t1           | 0.0155        | U3 snoRNP-associated protein Esf2 / RRM_ABT1_like                                                                      |
| MvSI-1064-A1-R4_A1g00772        | Ls_CBS5930 g3768.t1;Ls_CBS5931 g4601.t1           | 0.0000        | S-(hydroxymethyl)glutathione dehydrogenase / alcohol dehydrogenase                                                     |
| MvSI-1064-A1-R4_A1g00800        | Ls_CBS5930 g1990.t1 corr;Ls_CBS5931 g4209.t1 corr | 0.0000        | hypothetical protein                                                                                                   |
| MvSI-1064-A1-R4_A1g00844        | Ls_CBS5930 g3965.t1;Ls_CBS5931 g6949.t1           | 0.0058        | hypothetical protein                                                                                                   |
| MvSI-1064-A1-R4_A1g00854        | Ls_CBS5930 g8369.t1 corr;Ls_CBS5931 g3662.t1      | 0.0159        | karyopherin kap95                                                                                                      |
| MvSI-1064-A1-R4_A1g00970        | Ls_CBS5930 g6624.t1 corr;Ls_CBS5931 g3773.t1 corr | 0.0000        | T-complex protein 1 subunit beta                                                                                       |
| MvSI-1064-A1-R4_A1g00971        | Ls_CBS5930 g5099.t1;Ls_CBS5931 g239.t1            | 0.0488        | dolichyldiphosphatase / PAP2_like                                                                                      |
| MvSI-1064-A1-R4_A1g00972        | Ls_CBS5930 g5100.t1;Ls_CBS5931 g238.t1            | 0.0065        | hypothetical protein                                                                                                   |
| MvSI-1064-A1-R4_A1g00997        | Ls_CBS5930 g1916.t1;Ls_CBS5931 g98.t1             | 0.0062        | hypothetical protein                                                                                                   |
| MvSI-1064-A1-R4_A1g00998        | Ls_CBS5930 g3566.t1;Ls_CBS5931 g147.t1            | 0.1334        | U3 small nucleolar ribonucleoprotein IMP3 / Ribosomal protein S4/S9                                                    |
| MvSI-1064-A1-R4_A1g01017        | Ls_CBS5930 g3407.t1;Ls_CBS5931 g8158.t1           | 0.0516        | phosphatidylethanolamine N-methyltransferase (PEMT)                                                                    |
| MvSI-1064-A1-R4_A1g01154        | Ls_CBS5930 g5411.t1 corr;Ls_CBS5931 g3145.t1      | 0.0786        | ribosomal protein L1                                                                                                   |
| MvSI-1064-A1-R4_A1g01159        | Ls_CBS5930 g3515.t1;Ls_CBS5931 g197.t1            | 0.0000        | bZIP transcription factor (AP-1)                                                                                       |
| MvSI-1064-A1-R4_A1g01160        | Ls_CBS5930 g5395.t1;Ls_CBS5931 g3159.t1           | 0.0239        | COP9 signalosome complex subunit 2                                                                                     |
| MvSI-1064-A1-R4_A1g01161        | Ls_CBS5930 g6628.t1;Ls_CBS5931 g3769.t1           | 0.0000        | mitochondrial carrier protein                                                                                          |
| MvSI-1064-A1-R4_A1g01162        | Ls_CBS5930 g5385.t1;Ls_CBS5931 g3169.t1           | 0.0986        | hypothetical protein                                                                                                   |
| MvSI-1064-A1-R4_A1g01163        | Ls_CBS5930 g6627.t1;Ls_CBS5931 g3770.t1           | 0.0000        | ADP-ribosylation factor-like protein 2                                                                                 |
| MvSI-1064-A1-R4_A1g01388        | Ls_CBS5930 g4892.t1 corr;Ls_CBS5931 g6975.t1 corr | 0.0948        | ribosome assembly protein Noc2                                                                                         |
| MvSI-1064-A1-R4_A1g01440        | Ls_CBS5930 g3762.t1;Ls_CBS5931 g4607.t1           | 0.0000        | autophagy-related protein 7 / E1-like protein-activating enzyme Gsa7p/Apg7p                                            |
| MvSI-1064-A1-R4_A1g01441        | Ls_CBS5930 g3507.t1;Ls_CBS5931 g205.t1            | 0.0000        | zinc finger, C3HC4 RING-type protein                                                                                   |
| MvSI-1064-A1-R4_A1g01457        | Ls_CBS5930 g6847.t1;Ls_CBS5931 g3790.t1           | 0.0022        | unnamed protein product                                                                                                |
| MvSI-1064-A1-R4_A1g01458        | Ls_CBS5930 g6847.t1;Ls_CBS5931 g3790.t1           | 0.0022        | DNA-directed RNA polymerase III subunit RPC1                                                                           |



**Table S3. Gene ID and putative function of the genes located in the different evolutionary strata in *Microbotryum lychnidis-dioicae* (MvSI) (shared with *M. lagerheimii* (MvSv) mating-type chromosomes). The two HD genes are highlighted in bold and grey. The  $d_s$  corresponds to synonymous divergence between alleles associated to the alternative mating types of the sequenced individual.**

| MvSI gene ID ( $a_1$ )   | MvSv gene ID ( $a_1$ )     | $d_s$ in MvSI | $d_s$ in MvSv | Stratum | Putative function                                                                                                                                                                                                                                        |
|--------------------------|----------------------------|---------------|---------------|---------|----------------------------------------------------------------------------------------------------------------------------------------------------------------------------------------------------------------------------------------------------------|
| MvSI-1064-A1-R4_A1g01509 | MvSv-1253-A1-R1_MC03g02122 | 0             | 0             | PAR     | "AutoIPR: IPR008926:Ribonucleotide reductase R1 subunit, N-terminal; IPR013346:Ribonucleotide reductase, class I, alpha subunit; IPR013350:Ribonucleotide reductase alpha chain;"                                                                        |
| MvSI-1064-A1-R4_A1g01508 | MvSv-1253-A1-R1_MC03g02123 | 0             | 0             | PAR     | AutoIPR: IPR010482: Peroxin/Dysferlin domain;                                                                                                                                                                                                            |
| MvSI-1064-A1-R4_A1g01502 | MvSv-1253-A1-R1_MC03g02124 | 0,002787      | 0             | PAR     | AutoIPR: IPR009053: Prefoldin;                                                                                                                                                                                                                           |
| MvSI-1064-A1-R4_A1g01501 | MvSv-1253-A1-R1_MC03g02125 | 0             | 0             | PAR     | AutoIPR: IPR001805: Adenosine kinase;                                                                                                                                                                                                                    |
| MvSI-1064-A1-R4_A1g01500 | MvSv-1253-A1-R1_MC03g02126 | 0             | 0             | PAR     | AutoIPR: IPR016024: Armadillo-type fold; IPR027159: Nuclear cap-binding protein subunit 1;                                                                                                                                                               |
| MvSI-1064-A1-R4_A1g01498 | MvSv-1253-A1-R1_MC03g02130 | 0             | 0             | PAR     | AutoIPR: IPR005821: Ion transport domain;                                                                                                                                                                                                                |
| MvSI-1064-A1-R4_A1g01497 | MvSv-1253-A1-R1_MC03g02134 | 0             | 0             | PAR     | AutoIPR: IPR011992: EF-hand domain pair;                                                                                                                                                                                                                 |
| MvSI-1064-A1-R4_A1g01492 | MvSv-1253-A1-R1_MC03g02142 | 0             | 0             | PAR     |                                                                                                                                                                                                                                                          |
| MvSI-1064-A1-R4_A1g01491 | MvSv-1253-A1-R1_MC03g02144 | 0             | 0             | PAR     |                                                                                                                                                                                                                                                          |
| MvSI-1064-A1-R4_A1g01489 | MvSv-1253-A1-R1_MC03g02148 | 0             | 0             | PAR     | "AutoIPR: IPR006110: RNA polymerase, subunit omega/K/RPABC2;"                                                                                                                                                                                            |
| MvSI-1064-A1-R4_A1g01488 | MvSv-1253-A1-R1_MC03g02149 | 0             | 0             | PAR     | "AutoIPR: IPR022591: Transcription initiation factor TFIID subunit 1, domain of unknown function;"                                                                                                                                                       |
| MvSI-1064-A1-R4_A1g01487 | MvSv-1253-A1-R1_MC03g02150 | 0             | 0             | PAR     | AutoIPR: IPR021709: Protein of unknown function DUF3292;                                                                                                                                                                                                 |
| MvSI-1064-A1-R4_A1g01478 | MvSv-1253-A1-R1_MC03g02153 | 0             | 0             | PAR     |                                                                                                                                                                                                                                                          |
| MvSI-1064-A1-R4_A1g01486 | MvSv-1253-A1-R1_MC03g02154 | 0             | 0             | PAR     | AutoIPR: IPR022440: Conserved hypothetical protein CHP03788;                                                                                                                                                                                             |
| MvSI-1064-A1-R4_A1g01485 | MvSv-1253-A1-R1_MC03g02155 | 0             | 0             | PAR     | AutoIPR: IPR001237: 43kDa postsynaptic protein; IPR001623: DnaJ domain; IPR026901: DnaJ homologue subfamily C member 3;                                                                                                                                  |
| MvSI-1064-A1-R4_A1g01474 | MvSv-1253-A1-R1_MC03g02159 | 0             | 0             | PAR     |                                                                                                                                                                                                                                                          |
| MvSI-1064-A1-R4_A1g01476 | MvSv-1253-A1-R1_MC03g02160 | 0             | 0             | PAR     |                                                                                                                                                                                                                                                          |
| MvSI-1064-A1-R4_A1g01477 | MvSv-1253-A1-R1_MC03g02164 | 0             | 0             | PAR     | AutoIPR: IPR006994: Transcription factor 25;                                                                                                                                                                                                             |
| MvSI-1064-A1-R4_A1g01484 | MvSv-1253-A1-R1_MC03g02165 | 0             | 0             | PAR     |                                                                                                                                                                                                                                                          |
| MvSI-1064-A1-R4_A1g01473 | MvSv-1253-A1-R1_MC03g02166 | 0             | 0             | PAR     |                                                                                                                                                                                                                                                          |
| MvSI-1064-A1-R4_A1g01472 | MvSv-1253-A1-R1_MC03g02167 | 0             | 0             | PAR     | AutoIPR: IPR003162: Transcription initiation factor TAFII31; IPR009072: Histone-fold;                                                                                                                                                                    |
| MvSI-1064-A1-R4_A1g01471 | MvSv-1253-A1-R1_MC03g02168 | 0             | 0             | PAR     | AutoIPR: IPR007900: Transcription initiation factor TFIID component TAF4;                                                                                                                                                                                |
| MvSI-1064-A1-R4_A1g01470 | MvSv-1253-A1-R1_MC03g02170 | 0             | 0             | PAR     |                                                                                                                                                                                                                                                          |
| MvSI-1064-A1-R4_A1g01468 | MvSv-1253-A1-R1_MC03g02172 | 0             | 0             | PAR     |                                                                                                                                                                                                                                                          |
| MvSI-1064-A1-R4_A1g01466 | MvSv-1253-A1-R1_MC03g02174 | 0             | 0             | PAR     |                                                                                                                                                                                                                                                          |
| MvSI-1064-A1-R4_A1g01463 | MvSv-1253-A1-R1_MC03g02180 | 0             | 0             | PAR     |                                                                                                                                                                                                                                                          |
| MvSI-1064-A1-R4_A1g01462 | MvSv-1253-A1-R1_MC03g02181 | 0             | 0             | PAR     | "AutoIPR: IPR014624: Predicted 26S proteasome regulatory complex, non-ATPase subcomplex, subunit s5a, Plasmodium; IPR027040: Proteasome subunit Rpn10;"                                                                                                  |
| MvSI-1064-A1-R4_A1g01461 | MvSv-1253-A1-R1_MC03g02182 | 0             | 0             | PAR     | AutoIPR: IPR000456: Ribosomal protein L17;                                                                                                                                                                                                               |
| MvSI-1064-A1-R4_A1g01460 | MvSv-1253-A1-R1_MC03g02183 | 0             | 0             | PAR     |                                                                                                                                                                                                                                                          |
| MvSI-1064-A1-R4_A1g01458 | MvSv-1253-A1-R1_MC03g02185 | 0             | 0,01838       | PAR     | "AutoIPR: IPR009010: Aspartate decarboxylase-like domain; IPR012754: DNA-directed RNA polymerase, subunit beta-prime; IPR015700: DNA-directed RNA polymerase III largest subunit;"                                                                       |
| MvSI-1064-A1-R4_A1g01457 | MvSv-1253-A1-R1_MC03g02186 | 0             | 0,02487       | PAR     |                                                                                                                                                                                                                                                          |
| MvSI-1064-A1-R4_A1g01456 | MvSv-1253-A1-R1_MC03g02187 | 0             | 0             | PAR     |                                                                                                                                                                                                                                                          |
| MvSI-1064-A1-R4_A1g01455 | MvSv-1253-A1-R1_MC03g02188 | 0             | 0             | PAR     |                                                                                                                                                                                                                                                          |
| MvSI-1064-A1-R4_A1g01454 | MvSv-1253-A1-R1_MC03g02189 | 0             | 0             | PAR     |                                                                                                                                                                                                                                                          |
| MvSI-1064-A1-R4_A1g01453 | MvSv-1253-A1-R1_MC03g02190 | 0             | 0             | PAR     | "AutoIPR: IPR005828: General substrate transporter; IPR016196: Major facilitator superfamily domain, general substrate transporter;"                                                                                                                     |
| MvSI-1064-A1-R4_A1g01451 | MvSv-1253-A1-R1_MC03g02191 | 0             | 0             | PAR     | "AutoIPR: IPR011042: Six-bladed beta-propeller, TolB-like;"                                                                                                                                                                                              |
| MvSI-1064-A1-R4_A1g01450 | MvSv-1253-A1-R1_MC03g02192 | 0             | 0             | PAR     | "AutoIPR: IPR009082: Signal transduction histidine kinase, homodimeric domain; IPR011006: CheY-like superfamily; IPR013655: PAS fold-3; IPR014285: Nitrogen fixation negative regulator NifL;"                                                           |
| MvSI-1064-A1-R4_A1g01447 | MvSv-1253-A1-R1_MC03g02193 | 0             | 0             | PAR     | "AutoIPR: IPR017923: Transcription factor IIS, N-terminal;"                                                                                                                                                                                              |
| MvSI-1064-A1-R4_A1g01446 | MvSv-1253-A1-R1_MC03g02194 | 0             | 0             | PAR     |                                                                                                                                                                                                                                                          |
| MvSI-1064-A1-R4_A1g01445 | MvSv-1253-A1-R1_MC03g02195 | 0             | 0             | PAR     |                                                                                                                                                                                                                                                          |
| MvSI-1064-A1-R4_A1g01444 | MvSv-1253-A1-R1_MC03g02196 | 0             | 0             | PAR     | "AutoIPR: IPR002226: Catalase haem-binding site; IPR010582: Catalase immune-responsive domain; IPR011614: Catalase core domain; IPR018028: Catalase, monofunctional, haem-containing; IPR020835: Catalase-like domain; IPR024708: Catalase active site;" |

| MvSI gene ID (a <sub>1</sub> )  | MvSv gene ID (a <sub>1</sub> )    | d <sub>s</sub> in MvSI | d <sub>s</sub> in MvSv | Stratum     | Putative function                                                                                                                                                                                                                       |
|---------------------------------|-----------------------------------|------------------------|------------------------|-------------|-----------------------------------------------------------------------------------------------------------------------------------------------------------------------------------------------------------------------------------------|
| MvSI-1064-A1-R4_A1g01441        | MvSv-1253-A1-R1_MC03g02203        | 0                      | 0,00184                | blue        | "AutoIPR: IPR013083:Zinc finger, RING/FYVE/PHD-type;"                                                                                                                                                                                   |
| MvSI-1064-A1-R4_A1g01440        | MvSv-1253-A1-R1_MC03g02204        | 0                      | 0,008478               | blue        | "AutoIPR: IPR006285:Ubiquitin-like modifier-activating enzyme Atg7; IPR018075:Ubiquitin-activating enzyme, E1;"                                                                                                                         |
| MvSI-1064-A1-R4_A1g01163        | MvSv-1253-A1-R1_MC03g02211        | 0,04476                | 0,009024               | blue        | "AutoIPR: IPR005225:Small GTP-binding protein domain; IPR006689:Small GTPase superfamily, ARF/SAR type; IPR027417:P-loop containing nucleoside triphosphate hydrolase;"                                                                 |
| MvSI-1064-A1-R4_A1g01162        | MvSv-1253-A1-R1_MC03g02212        | 0,02929                | 0,0101                 | blue        |                                                                                                                                                                                                                                         |
| MvSI-1064-A1-R4_A1g01161        | MvSv-1253-A1-R1_MC03g02213        | 0,00892                | 0,01558                | blue        | AutoIPR: IPR023395:Mitochondrial carrier domain;                                                                                                                                                                                        |
| MvSI-1064-A1-R4_A1g01160        | MvSv-1253-A1-R1_MC03g02214        | 0,002244               | 0,03034                | blue        | AutoIPR: IPR000717:Proteasome component (PCI) domain; IPR011990:Tetratricopeptide-like helical; IPR013143:PCI/PINT associated module;                                                                                                   |
| MvSI-1064-A1-R4_A1g01159        | MvSv-1253-A1-R1_MC03g02215        | 0,02168                | 0,0225                 | blue        | AutoIPR: IPR004827:Basic-leucine zipper domain; IPR013910:Transcription factor PAP1; IPR023167:Yap1 redox domain;                                                                                                                       |
| MvSI-1064-A1-R4_A1g01154        | MvSv-1253-A1-R1_MC03g02216        | 0,005776               | 0,0116                 | blue        |                                                                                                                                                                                                                                         |
| MvSI-1064-A1-R4_A1g00659        | MvSv-1253-A1-R1_MC03g02219        | 0,04854                | 0,008824               | blue        | AutoIPR: IPR022751:Alpha-mannosyltransferase;                                                                                                                                                                                           |
| MvSI-1064-A1-R4_A1g00800        | MvSv-1253-A1-R1_MC03g02223        | 0,03416                | 0,007407               | blue        | "AutoIPR: IPR002085:Alcohol dehydrogenase superfamily, zinc-type; IPR016040:NAD(P)-binding domain; IPR020843:Polyketide synthase, enoylreductase;"                                                                                      |
| MvSI-1064-A1-R4_A1g00801        | MvSv-1253-A1-R1_MC03g02224        | 0                      | 0,0222                 | blue        | AutoIPR: IPR007146:Sas10/Utp3/C1D; IPR011082:Exosome-associated factor Rrp47/DNA strand repair C1D;                                                                                                                                     |
| MvSI-1064-A1-R4_A1g00808        | MvSv-1253-A1-R1_MC03g02226        | 0,6698                 | 0,02125                | blue        |                                                                                                                                                                                                                                         |
| <b>MvSI-1064-A1-R4_A1g00591</b> | <b>MvSv-1253-A1-R1_MC03g02227</b> | <b>0,3894</b>          | <b>0,4844</b>          | <b>blue</b> | <b>AutoIPR: IPR008422:Homeobox KN domain; IPR009057:Homeodomain-like; HD gene</b>                                                                                                                                                       |
| <b>MvSI-1064-A1-R4_A1g00592</b> | <b>MvSv-1253-A1-R1_MC03g02228</b> | <b>0,8506</b>          | <b>0,669</b>           | <b>blue</b> | <b>HD gene</b>                                                                                                                                                                                                                          |
| MvSI-1064-A1-R4_A1g00593        | MvSv-1253-A1-R1_MC03g02229        | 0,04204                | 0,03775                | blue        | AutoIPR: IPR027073:5'-3' exoribonuclease;                                                                                                                                                                                               |
| MvSI-1064-A1-R4_A1g00772        | MvSv-1253-A1-R1_MC03g02230        | 0,03975                | 0,005973               | blue        | "AutoIPR: IPR012677:Nucleotide-binding, alpha-beta plait;"                                                                                                                                                                              |
| MvSI-1064-A1-R4_A1g00025        | MvSv-1253-A1-R1_MC03g02235        | 0                      | 0,01151                | blue        | "AutoIPR: IPR000743:Glycoside hydrolase, family 28; IPR011050:Pectin lyase fold/virulence factor;"                                                                                                                                      |
| MvSI-1064-A1-R4_A1g00478        | MvSv-1253-A1-R1_MC03g02236        | 0,09438                | 0,03602                | blue        | AutoIPR: IPR012336:Thioredoxin-like fold;                                                                                                                                                                                               |
| MvSI-1064-A1-R4_A1g00495        | MvSv-1253-A1-R1_MC03g02237        | 0,06234                | 0,01041                | blue        | "AutoIPR: IPR012677:Nucleotide-binding, alpha-beta plait;"                                                                                                                                                                              |
| MvSI-1064-A1-R4_A1g01431        | MvSv-1253-A1-R1_MC03g02238        | 0,03381                | 0                      | blue        | "AutoIPR: IPR001752:Kinesin, motor domain; IPR008984:SMAD/FHA domain; IPR011993:Plckstrin homology-like domain; IPR022164:Kinesin-like; IPR027417:P-loop containing nucleoside triphosphate hydrolase; IPR027640:Kinesin-like protein;" |
| MvSI-1064-A1-R4_A1g00997        | MvSv-1253-A1-R1_MC03g02240        | 0,03601                | 0,01086                | blue        |                                                                                                                                                                                                                                         |
| MvSI-1064-A1-R4_A1g00998        | MvSv-1253-A1-R1_MC03g02241        | 0,03152                | 0,004411               | blue        | AutoIPR: IPR022801:Ribosomal protein S4/S9;                                                                                                                                                                                             |
| MvSI-1064-A1-R4_A1g00972        | MvSv-1253-A1-R1_MC03g02242        | 0,01747                | 0,0052                 | blue        |                                                                                                                                                                                                                                         |
| MvSI-1064-A1-R4_A1g00971        | MvSv-1253-A1-R1_MC03g02243        | 0,02441                | 0,02234                | blue        | AutoIPR: IPR000326:Phosphatidic acid phosphatase type 2/haloperoxidase;                                                                                                                                                                 |
| MvSI-1064-A1-R4_A1g00970        | MvSv-1253-A1-R1_MC03g02244        | 0,01335                | 0,01239                | blue        | AutoIPR: IPR002423:Chaperonin Cpn60/TCP-1; IPR027409:GroEL-like apical domain; IPR027410:TCP-1-like chaperonin intermediate domain; IPR027413:GroEL-like equatorial domain;                                                             |
| MvSI-1064-A1-R4_A1g00960        | MvSv-1253-A1-R1_MC03g02248        | 0,03457                | 0                      | black       | AutoIPR: IPR005024:Snf7;                                                                                                                                                                                                                |
| MvSI-1064-A1-R4_A1g00958        | MvSv-1253-A1-R1_MC03g02249        | 0,0192                 | 0                      | black       | AutoIPR: IPR004000:Actin-related protein;                                                                                                                                                                                               |
| MvSI-1064-A1-R4_A1g00957        | MvSv-1253-A1-R1_MC03g02250        | 0,0344                 | 0                      | black       | AutoIPR: IPR013926:CGI121/TPRKB;                                                                                                                                                                                                        |
| MvSI-1064-A1-R4_A1g00956        | MvSv-1253-A1-R1_MC03g02251        | 0,05355                | 0                      | black       |                                                                                                                                                                                                                                         |
| MvSI-1064-A1-R4_A1g00955        | MvSv-1253-A1-R1_MC03g02252        | 0,1164                 | 0                      | black       |                                                                                                                                                                                                                                         |
| MvSI-1064-A1-R4_A1g00922        | MvSv-1253-A1-R1_MC03g02253        | 0,04901                | 0                      | black       |                                                                                                                                                                                                                                         |
| MvSI-1064-A1-R4_A1g00921        | MvSv-1253-A1-R1_MC03g02254        | 0,02868                | 0,003722               | black       | AutoIPR: IPR008942:ENTH/VHS;                                                                                                                                                                                                            |
| MvSI-1064-A1-R4_A1g00920        | MvSv-1253-A1-R1_MC03g02255        | 0,03374                | 0                      | black       |                                                                                                                                                                                                                                         |
| MvSI-1064-A1-R4_A1g00913        | MvSv-1253-A1-R1_MC03g02256        | 0,06733                | 0,000814               | black       | AutoIPR: IPR012943:Spindle associated; IPR024545:Mto2p-binding domain;                                                                                                                                                                  |
| MvSI-1064-A1-R4_A1g00912        | MvSv-1253-A1-R1_MC03g02260        | 0                      | 0                      | black       | AutoIPR: IPR003782:Copper chaperone SCO1/SenC; IPR012336:Thioredoxin-like fold;                                                                                                                                                         |
| MvSI-1064-A1-R4_A1g00911        | MvSv-1253-A1-R1_MC03g02261        | 0,01205                | 0                      | black       | "AutoIPR: IPR008698:NADH:ubiquinone oxidoreductase, B18 subunit;"                                                                                                                                                                       |
| MvSI-1064-A1-R4_A1g00794        | MvSv-1253-A1-R1_MC03g02262        | 0,02735                | 0                      | black       | AutoIPR: IPR009846:Splicing factor 3B subunit 5/RDS3 complex subunit 10;                                                                                                                                                                |
| MvSI-1064-A1-R4_A1g00644        | MvSv-1253-A1-R1_MC03g02267        | 0,03817                | 0                      | black       | "AutoIPR: IPR000571:Zinc finger, CCCH-type;"                                                                                                                                                                                            |
| MvSI-1064-A1-R4_A1g00645        | MvSv-1253-A1-R1_MC03g02268        | 0,0177                 | 0                      | black       | AutoIPR: IPR001138:Zn(2)-C6 fungal-type DNA-binding domain;                                                                                                                                                                             |
| MvSI-1064-A1-R4_A1g00646        | MvSv-1253-A1-R1_MC03g02269        | 0,01013                | 0                      | black       | AutoIPR: IPR012908:GPI inositol-deacylase PGAP1-like;                                                                                                                                                                                   |
| MvSI-1064-A1-R4_A1g00647        | MvSv-1253-A1-R1_MC03g02270        | 0,07508                | 0                      | black       | "AutoIPR: IPR007541:Uncharacterised protein family, basic secretory protein;"                                                                                                                                                           |
| MvSI-1064-A1-R4_A1g00648        | MvSv-1253-A1-R1_MC03g02271        | 0,02229                | 0                      | black       | "AutoIPR: IPR019339:CBF1-interacting co-repressor CIR, N-terminal domain; IPR022209:Pre-mRNA splicing factor;"                                                                                                                          |
| MvSI-1064-A1-R4_A1g01129        | MvSv-1253-A1-R1_MC03g02273        | 0,05174                | 0                      | black       | AutoIPR: IPR008978:HSP20-like chaperone;                                                                                                                                                                                                |
| MvSI-1064-A1-R4_A1g00311        | MvSv-1253-A1-R1_MC03g02276        | 0,02807                | 0                      | black       | AutoIPR: IPR015915:Kelch-type beta propeller;                                                                                                                                                                                           |
| MvSI-1064-A1-R4_A1g00312        | MvSv-1253-A1-R1_MC03g02277        | 0,02654                | 0                      | black       | "AutoIPR: IPR019191:Essential protein Yae1, N-terminal;"                                                                                                                                                                                |
| MvSI-1064-A1-R4_A1g00886        | MvSv-1253-A1-R1_MC03g02280        | 0,03442                | 0                      | black       |                                                                                                                                                                                                                                         |
| MvSI-1064-A1-R4_A1g00869        | MvSv-1253-A1-R1_MC03g02282        | 0,04332                | 0                      | black       | "AutoIPR: IPR006003:Carbohydrate kinase, FGGY-related;"                                                                                                                                                                                 |

| MvSI gene ID (a <sub>1</sub> ) | MvSv gene ID (a <sub>1</sub> ) | d <sub>s</sub> in MvSI | d <sub>s</sub> in MvSv | Stratum | Putative function                                                                                                                                                                                                        |
|--------------------------------|--------------------------------|------------------------|------------------------|---------|--------------------------------------------------------------------------------------------------------------------------------------------------------------------------------------------------------------------------|
| MvSI-1064-A1-R4_A1g01135       | MvSv-1253-A1-R1_MC16g09520     | 0,05381                | 0                      | black   | "AutoIPR: IPR019400:Peptidase C65, otubain;"                                                                                                                                                                             |
| MvSI-1064-A1-R4_A1g01136       | MvSv-1253-A1-R1_MC16g09519     | 0,0594                 | 0                      | black   |                                                                                                                                                                                                                          |
| MvSI-1064-A1-R4_A1g01137       | MvSv-1253-A1-R1_MC16g09518     | 0,02957                | 0                      | black   |                                                                                                                                                                                                                          |
| MvSI-1064-A1-R4_A1g00732       | MvSv-1253-A1-R1_MC16g09516     | 0,002396               | 0                      | black   |                                                                                                                                                                                                                          |
| MvSI-1064-A1-R4_A1g01407       | MvSv-1253-A1-R1_MC16g09514     | 0,02369                | 0                      | black   |                                                                                                                                                                                                                          |
| MvSI-1064-A1-R4_A1g01406       | MvSv-1253-A1-R1_MC16g09512     | 0,002257               | 0                      | black   | AutoIPR: IPR007757:MT-A70-like;                                                                                                                                                                                          |
| MvSI-1064-A1-R4_A1g01405       | MvSv-1253-A1-R1_MC16g09511     | 0,01406                | 0                      | black   | AutoIPR: IPR027450:Alpha-ketoglutarate-dependent dioxygenase AlkB-like;                                                                                                                                                  |
| MvSI-1064-A1-R4_A1g01404       | MvSv-1253-A1-R1_MC16g09510     | 0,05471                | 0                      | black   |                                                                                                                                                                                                                          |
| MvSI-1064-A1-R4_A1g00326       | MvSv-1253-A1-R1_MC16g09508     | 0,04389                | 0                      | black   |                                                                                                                                                                                                                          |
| MvSI-1064-A1-R4_A1g00327       | MvSv-1253-A1-R1_MC16g09507     | 0,02724                | 0                      | black   |                                                                                                                                                                                                                          |
| MvSI-1064-A1-R4_A1g00448       | MvSv-1253-A1-R1_MC16g09503     | 0,06255                | 0                      | black   |                                                                                                                                                                                                                          |
| MvSI-1064-A1-R4_A1g00749       | MvSv-1253-A1-R1_MC16g09501     | 0,02509                | 0                      | black   |                                                                                                                                                                                                                          |
| MvSI-1064-A1-R4_A1g00750       | MvSv-1253-A1-R1_MC16g09500     | 0,002806               | 0                      | black   |                                                                                                                                                                                                                          |
| MvSI-1064-A1-R4_A1g00751       | MvSv-1253-A1-R1_MC16g09499     | 0,01061                | 0                      | black   |                                                                                                                                                                                                                          |
| MvSI-1064-A1-R4_A1g00752       | MvSv-1253-A1-R1_MC16g09498     | 0,07687                | 0                      | black   |                                                                                                                                                                                                                          |
| MvSI-1064-A1-R4_A1g00755       | MvSv-1253-A1-R1_MC16g09497     | 0,07173                | 0                      | black   |                                                                                                                                                                                                                          |
| MvSI-1064-A1-R4_A1g00757       | MvSv-1253-A1-R1_MC16g09496     | 0,05103                | 0                      | black   | AutoIPR: IPR001461:Peptidase A1; IPR021109:Aspartic peptidase;                                                                                                                                                           |
| MvSI-1064-A1-R4_A1g00544       | MvSv-1253-A1-R1_MC16g09494     | 0,007251               | 0                      | black   | "AutoIPR: IPR010032:FAD-linked oxidoreductase; IPR016166:FAD-binding, type 2; IPR023595:L-gulonolactone/D-arabinono-1,4-lactone oxidase;"                                                                                |
| MvSI-1064-A1-R4_A1g00543       | MvSv-1253-A1-R1_MC16g09493     | 0                      | 0                      | black   | AutoIPR: IPR016460:Coatomeer beta subunit (COPB1);                                                                                                                                                                       |
| MvSI-1064-A1-R4_A1g00542       | MvSv-1253-A1-R1_MC16g09492     | 0,002593               | 0                      | black   | IPR026739:AP complex subunit beta;                                                                                                                                                                                       |
| MvSI-1064-A1-R4_A1g00541       | MvSv-1253-A1-R1_MC16g09488     | 0,01331                | 0                      | black   | AutoIPR: IPR001737:Ribosomal RNA adenine methylase transferase; IPR025814:18S rRNA dimethylase DIM1;                                                                                                                     |
| MvSI-1064-A1-R4_A1g00534       | MvSv-1253-A1-R1_MC16g09487     | 0                      | 0                      | black   | AutoIPR: IPR024990:Anaphase-promoting complex subunit 1;                                                                                                                                                                 |
| MvSI-1064-A1-R4_A1g00533       | MvSv-1253-A1-R1_MC16g09486     | 0,07944                | 0                      | black   | AutoIPR: IPR001557:L-lactate/malate dehydrogenase;                                                                                                                                                                       |
| MvSI-1064-A1-R4_A1g00532       | MvSv-1253-A1-R1_MC16g09485     | 0,0261                 | 0                      | black   | "AutoIPR: IPR011234:Fumarylacetoacetase, C-terminal-related;"                                                                                                                                                            |
| MvSI-1064-A1-R4_A1g00528       | MvSv-1253-A1-R1_MC16g09482     | 0,02956                | 0                      | black   |                                                                                                                                                                                                                          |
| MvSI-1064-A1-R4_A1g00525       | MvSv-1253-A1-R1_MC16g09479     | 0,02199                | 0,01648                | black   |                                                                                                                                                                                                                          |
| MvSI-1064-A1-R4_A1g00522       | MvSv-1253-A1-R1_MC16g09478     | 0,04318                | 0,01311                | black   | "AutoIPR: IPR011701:Major facilitator superfamily; IPR016196:Major facilitator superfamily domain, general substrate transporter;"                                                                                       |
| MvSI-1064-A1-R4_A1g00521       | MvSv-1253-A1-R1_MC16g09477     | 0,002238               | 0,002248               | black   | AutoIPR: IPR013126:Heat shock protein 70 family;                                                                                                                                                                         |
| MvSI-1064-A1-R4_A1g00520       | MvSv-1253-A1-R1_MC16g09476     | 0                      | 0,02046                | black   |                                                                                                                                                                                                                          |
| MvSI-1064-A1-R4_A1g00519       | MvSv-1253-A1-R1_MC16g09475     | 0                      | 0,01423                | black   | "AutoIPR: IPR011016:Zinc finger, RING-CH-type; IPR013083:Zinc finger, RING/FYVE/PHD-type;"                                                                                                                               |
| MvSI-1064-A1-R4_A1g00518       | MvSv-1253-A1-R1_MC16g09474     | 0,002431               | 0,01173                | black   | AutoIPR: IPR011047:Quinonoprotein alcohol dehydrogenase-like superfamily; IPR015943:WD40/YVTN repeat-like-containing domain;                                                                                             |
| MvSI-1064-A1-R4_A1g00517       | MvSv-1253-A1-R1_MC16g09473     | 0                      | 0                      | black   |                                                                                                                                                                                                                          |
| MvSI-1064-A1-R4_A1g00516       | MvSv-1253-A1-R1_MC16g09472     | 0,02563                | 0,01878                | black   | "AutoIPR: IPR007087:Zinc finger, C2H2; IPR015940:Ubiquitin-associated/translation elongation factor EF1B, N-terminal, eukaryote; IPR017346:Uncharacterised conserved protein UCPO37991, UAS/UBX;"                        |
| MvSI-1064-A1-R4_A1g00515       | MvSv-1253-A1-R1_MC16g09471     | 0,01326                | 0,02447                | black   | "AutoIPR: IPR006293:DNA helicase, ATP-dependent, RecQ type, bacterial; IPR027417:P-loop containing nucleoside triphosphate hydrolase;"                                                                                   |
| MvSI-1064-A1-R4_A1g00514       | MvSv-1253-A1-R1_MC16g09470     | 0,02296                | 0,02073                | black   | AutoIPR: IPR008936:Rho GTPase activation protein;                                                                                                                                                                        |
| MvSI-1064-A1-R4_A1g00513       | MvSv-1253-A1-R1_MC16g09469     | 0,0009531              | 0,01438                | black   | AutoIPR: IPR008521:Magnesium transporter NIPA;                                                                                                                                                                           |
| MvSI-1064-A1-R4_A1g00512       | MvSv-1253-A1-R1_MC16g09468     | 0                      | 0,02597                | black   | "AutoIPR: IPR007305:Vesicle transport protein, Got1/SFT2-like;"                                                                                                                                                          |
| MvSI-1064-A1-R4_A1g00511       | MvSv-1253-A1-R1_MC16g09467     | 0                      | 0,03902                | black   | AutoIPR: IPR023395:Mitochondrial carrier domain;                                                                                                                                                                         |
| MvSI-1064-A1-R4_A1g00510       | MvSv-1253-A1-R1_MC16g09466     | 0                      | 0,01317                | black   | "AutoIPR: IPR003754:Tetrapyrrole biosynthesis, uroporphyrinogen III synthase;"                                                                                                                                           |
| MvSI-1064-A1-R4_A1g00509       | MvSv-1253-A1-R1_MC16g09465     | 0,09326                | 0,02499                | black   | AutoIPR: IPR003817:Phosphatidylserine decarboxylase-related;                                                                                                                                                             |
| MvSI-1064-A1-R4_A1g00508       | MvSv-1253-A1-R1_MC16g09464     | 0,1019                 | 0,01383                | black   | "AutoIPR: IPR002938:Monooxygenase, FAD-binding; IPR020946:Flavin monooxygenase-like;"                                                                                                                                    |
| MvSI-1064-A1-R4_A1g00506       | MvSv-1253-A1-R1_MC16g09461     | 0,004505               | 0                      | black   | AutoIPR: IPR002791:Domain of unknown function DUF89;                                                                                                                                                                     |
| MvSI-1064-A1-R4_A1g00505       | MvSv-1253-A1-R1_MC16g09460     | 0                      | 0,01273                | black   | "AutoIPR: IPR005097:Saccharopine dehydrogenase / Homospermidine synthase; IPR007698:Alanine dehydrogenase/PNT, NAD(H)-binding domain; IPR007886:Alanine dehydrogenase/pyridine nucleotide transhydrogenase, N-terminal;" |
| MvSI-1064-A1-R4_A1g00503       | MvSv-1253-A1-R1_MC16g09459     | 0,009071               | 0,01064                | black   | AutoIPR: IPR008942:ENTH/VHS; IPR018205:VHS subgroup;                                                                                                                                                                     |
| MvSI-1064-A1-R4_A1g01351       | MvSv-1253-A1-R1_MC16g09458     | 0,003649               | 0                      | black   | AutoIPR: IPR001189:Manganese/iron superoxide dismutase;                                                                                                                                                                  |
| MvSI-1064-A1-R4_A1g01350       | MvSv-1253-A1-R1_MC16g09457     | 0,01323                | 0                      | black   | AutoIPR: IPR024338:Stretch-activated cation channel Mid1;                                                                                                                                                                |
| MvSI-1064-A1-R4_A1g01348       | MvSv-1253-A1-R1_MC16g09456     | 0,0105                 | 0                      | black   | AutoIPR: IPR000387:Protein-tyrosine/Dual specificity phosphatase; IPR008343:Mitogen-activated protein (MAP) kinase phosphatase; IPR024950:Dual specificity phosphatase;                                                  |

| MvSI gene ID (a <sub>1</sub> ) | MvSv gene ID (a <sub>1</sub> ) | d <sub>s</sub> in MvSI | d <sub>s</sub> in MvSv | Stratum | Putative function                                                                                                                                                                                                                                                       |
|--------------------------------|--------------------------------|------------------------|------------------------|---------|-------------------------------------------------------------------------------------------------------------------------------------------------------------------------------------------------------------------------------------------------------------------------|
| MvSI-1064-A1-R4_A1g01347       | MvSv-1253-A1-R1_MC16g09455     | 0,02952                | 0                      | black   | "AutoIPR: IPR012954:BP28, C-terminal domain; IPR016024:Armadiolo-type fold; IPR022125:U3 small nucleolar RNA-associated protein 10;"                                                                                                                                    |
| MvSI-1064-A1-R4_A1g01415       | MvSv-1253-A1-R1_MC16g09444     | 0,02235                | 0                      | black   | "AutoIPR: IPR008352:Mitogen-activated protein (MAP) kinase, p38; IPR020777:Tyrosine-protein kinase, neurotrophic receptor;"                                                                                                                                             |
| MvSI-1064-A1-R4_A1g01393       | MvSv-1253-A1-R1_MC16g09443     | 0,03313                | 0                      | black   |                                                                                                                                                                                                                                                                         |
| MvSI-1064-A1-R4_A1g01392       | MvSv-1253-A1-R1_MC16g09442     | 0,02447                | 0                      | black   |                                                                                                                                                                                                                                                                         |
| MvSI-1064-A1-R4_A1g01479       | MvSv-1253-A1-R1_MC16g09439     | 0                      | 0                      | black   |                                                                                                                                                                                                                                                                         |
| MvSI-1064-A1-R4_A1g00211       | MvSv-1253-A1-R1_MC12g07980     | 0,01398                | 0                      | black   | "AutoIPR: IPR008010:Membrane protein, Tapt1/CMV receptor;"                                                                                                                                                                                                              |
| MvSI-1064-A1-R4_A1g00779       | MvSv-1253-A1-R1_MC12g07965     | 0,04375                | 0                      | black   | AutoIPR: IPR005378:Vacuolar protein sorting-associated protein 35;                                                                                                                                                                                                      |
| MvSI-1064-A1-R4_A1g00778       | MvSv-1253-A1-R1_MC12g07964     | 0,04144                | 0                      | black   | "AutoIPR: IPR015408:Zinc finger, Mcm10/DnaG-type;"                                                                                                                                                                                                                      |
| MvSI-1064-A1-R4_A1g00241       | MvSv-1253-A1-R1_MC12g07960     | 0,03193                | 0                      | black   |                                                                                                                                                                                                                                                                         |
| MvSI-1064-A1-R4_A1g00242       | MvSv-1253-A1-R1_MC12g07959     | 0,033                  | 0                      | black   | AutoIPR: IPR007653:Signal peptidase 22kDa subunit;                                                                                                                                                                                                                      |
| MvSI-1064-A1-R4_A1g00245       | MvSv-1253-A1-R1_MC12g07956     | 0,07408                | 0                      | black   |                                                                                                                                                                                                                                                                         |
| MvSI-1064-A1-R4_A1g00269       | MvSv-1253-A1-R1_MC12g07952     | 0,04395                | 0                      | black   | "AutoIPR: IPR003111:Peptidase S16, lon N-terminal; IPR014252:Sporulation protease LonC; IPR014721:Ribosomal protein S5 domain 2-type fold, subgroup; IPR015947:PUA-like domain; IPR027065:Lon protease; IPR027417:P-loop containing nucleoside triphosphate hydrolase;" |
| MvSI-1064-A1-R4_A1g00270       | MvSv-1253-A1-R1_MC12g07950     | 0,04929                | 0                      | black   | "AutoIPR: IPR006219:DHAP synthase, class 1; IPR013785:Aldolase-type TIM barrel;"                                                                                                                                                                                        |
| MvSI-1064-A1-R4_A1g00292       | MvSv-1253-A1-R1_MC12g07947     | 0,02908                | 0                      | black   | AutoIPR: IPR001394:Ubiquitin carboxyl-terminal hydrolases family 2; IPR019955:Ubiquitin supergroup;                                                                                                                                                                     |
| MvSI-1064-A1-R4_A1g00290       | MvSv-1253-A1-R1_MC12g07946     | 0,02661                | 0                      | black   | AutoIPR: IPR027815:Domain of unknown function DUF4463;                                                                                                                                                                                                                  |
| MvSI-1064-A1-R4_A1g00693       | MvSv-1253-A1-R1_MC12g07943     | 0                      | 0                      | black   | AutoIPR: IPR002042:Uricase;                                                                                                                                                                                                                                             |
| MvSI-1064-A1-R4_A1g00694       | MvSv-1253-A1-R1_MC12g07942     | 0,01544                | 0                      | black   | "AutoIPR: IPR002100:Transcription factor, MADS-box;"                                                                                                                                                                                                                    |
| MvSI-1064-A1-R4_A1g00719       | MvSv-1253-A1-R1_MC12g07935     | 0,1062                 | 0                      | black   | "AutoIPR: IPR004589:DNA helicase, ATP-dependent, RecQ type; IPR018973:DEAD/DEAH-box helicase, putative; IPR027417:P-loop containing nucleoside triphosphate hydrolase;"                                                                                                 |
| MvSI-1064-A1-R4_A1g00718       | MvSv-1253-A1-R1_MC12g07934     | 0,03731                | 0                      | black   | "AutoIPR: IPR007577:Glycosyltransferase, DXD sugar-binding motif;"                                                                                                                                                                                                      |
| MvSI-1064-A1-R4_A1g00254       | MvSv-1253-A1-R1_MC12g07933     | 0,03514                | 0                      | black   | AutoIPR: IPR003386:Lecithin:cholesterol/phospholipid:diacylglycerol acyltransferase;                                                                                                                                                                                    |
| MvSI-1064-A1-R4_A1g00359       | MvSv-1253-A1-R1_MC12g07932     | 0,02437                | 0                      | black   | AutoIPR: IPR020831:Glyceraldehyde/Erythrose phosphate dehydrogenase family;                                                                                                                                                                                             |
| MvSI-1064-A1-R4_A1g00281       | MvSv-1253-A1-R1_MC12g07931     | 0,04624                | 0                      | black   | "AutoIPR: IPR003959:ATPase, AAA-type, core; IPR027417:P-loop containing nucleoside triphosphate hydrolase;"                                                                                                                                                             |
| MvSI-1064-A1-R4_A1g00280       | MvSv-1253-A1-R1_MC12g07930     | 0,02891                | 0                      | black   | "AutoIPR: IPR008973:C2 calcium/lipid-binding domain, CaLB; IPR019558:Mammalian uncoordinated homology 13, subgroup, domain 2;"                                                                                                                                          |
| MvSI-1064-A1-R4_A1g00433       | MvSv-1253-A1-R1_MC12g07928     | 0,02267                | 0,001815               | black   | "AutoIPR: IPR022042:snRNA-activating protein complex, subunit 3;"                                                                                                                                                                                                       |
| MvSI-1064-A1-R4_A1g00432       | MvSv-1253-A1-R1_MC12g07927     | 0,1063                 | 0                      | black   | AutoIPR: IPR009071:High mobility group box domain;                                                                                                                                                                                                                      |
| MvSI-1064-A1-R4_A1g00349       | MvSv-1253-A1-R1_MC12g07926     | 0,09006                | 0                      | black   | AutoIPR: IPR000791:GPR1/FUN34/yaaH;                                                                                                                                                                                                                                     |
| MvSI-1064-A1-R4_A1g00350       | MvSv-1253-A1-R1_MC12g07925     | 0,02792                | 0                      | black   | AutoIPR: IPR015915:Kelch-type beta propeller;                                                                                                                                                                                                                           |
| MvSI-1064-A1-R4_A1g00351       | MvSv-1253-A1-R1_MC12g07924     | 0,03002                | 0,0007955              | black   | "AutoIPR: IPR007320:Programmed cell death protein 2, C-terminal; IPR015940:Ubiquitin-associated/translation elongation factor EF1B, N-terminal, eukaryote; IPR017346:Uncharacterised conserved protein UCPO37991, UAS/UBX;"                                             |
| MvSI-1064-A1-R4_A1g00352       | MvSv-1253-A1-R1_MC12g07923     | 0,03106                | 0,006247               | black   | "AutoIPR: IPR016656:Transcription initiation factor TFIIE, beta subunit;"                                                                                                                                                                                               |
| MvSI-1064-A1-R4_A1g01272       | MvSv-1253-A1-R1_MC12g07922     | 0,01626                | 0                      | black   | AutoIPR: IPR008417:B-cell receptor-associated 31-like;                                                                                                                                                                                                                  |
| MvSI-1064-A1-R4_A1g01271       | MvSv-1253-A1-R1_MC12g07921     | 0,01543                | 0                      | black   | AutoIPR: IPR008011:Complex 1 LYR protein;                                                                                                                                                                                                                               |
| MvSI-1064-A1-R4_A1g01173       | MvSv-1253-A1-R1_MC12g07920     | 0,03657                | 0,007907               | black   | "AutoIPR: IPR012677:Nucleotide-binding, alpha-beta plait;"                                                                                                                                                                                                              |
| MvSI-1064-A1-R4_A1g01174       | MvSv-1253-A1-R1_MC12g07919     | 0,02616                | 0                      | black   | AutoIPR: IPR014729:Rossmann-like alpha/beta/alpha sandwich fold;                                                                                                                                                                                                        |
| MvSI-1064-A1-R4_A1g01220       | MvSv-1253-A1-R1_MC12g07918     | 0,09423                | 0                      | black   | "AutoIPR: IPR001781:Zinc finger, LIM-type;"                                                                                                                                                                                                                             |
| MvSI-1064-A1-R4_A1g01219       | MvSv-1253-A1-R1_MC12g07917     | 0,06024                | 0                      | black   | AutoIPR: IPR018803:Stress-responsive protein Ish1;                                                                                                                                                                                                                      |
| MvSI-1064-A1-R4_A1g00165       | MvSv-1253-A1-R1_MC12g07913     | 0,03698                | 0,00352                | black   | "AutoIPR: IPR006153:Cation/H <sup>+</sup> exchanger; IPR018422:Cation/H <sup>+</sup> exchanger, CPA1 family;"                                                                                                                                                           |
| MvSI-1064-A1-R4_A1g00157       | MvSv-1253-A1-R1_MC12g07911     | 0,03635                | 0,01021                | black   | "AutoIPR: IPR016196:Major facilitator superfamily domain, general substrate transporter;"                                                                                                                                                                               |
| MvSI-1064-A1-R4_A1g00155       | MvSv-1253-A1-R1_MC12g07910     | 0,04423                | 0                      | black   | AutoIPR: IPR001645:Folypolyglutamate synthetase;                                                                                                                                                                                                                        |
| MvSI-1064-A1-R4_A1g00153       | MvSv-1253-A1-R1_MC12g07908     | 0,03147                | 0,003478               | black   | "AutoIPR: IPR010222:RNA helicase, ATP-dependent DEAH box, HrpA-type; IPR022307:DEAD/DEAH-box helicase, putative, actinobacteria; IPR027417:P-loop containing nucleoside triphosphate hydrolase;"                                                                        |
| MvSI-1064-A1-R4_A1g01212       | MvSv-1253-A1-R1_MC12g07907     | 0,03602                | 0,002255               | black   | "AutoIPR: IPR001208:Mini-chromosome maintenance, DNA-dependent ATPase; IPR027417:P-loop containing nucleoside triphosphate hydrolase; IPR027925:MCM N-terminal domain;"                                                                                                 |
| MvSI-1064-A1-R4_A1g01184       | MvSv-1253-A1-R1_MC12g07904     | 0,03576                | 0,006311               | black   | AutoIPR: IPR001708:Membrane insertase OXA1/ALB3/YidC;                                                                                                                                                                                                                   |
| MvSI-1064-A1-R4_A1g01189       | MvSv-1253-A1-R1_MC12g07903     | 0,02386                | 0                      | black   | "AutoIPR: IPR011598:Myc-type, basic helix-loop-helix (bHLH) domain;"                                                                                                                                                                                                    |
| MvSI-1064-A1-R4_A1g00016       | MvSv-1253-A1-R1_MC12g07897     | 0                      | 0                      | black   |                                                                                                                                                                                                                                                                         |
| MvSI-1064-A1-R4_A1g00017       | MvSv-1253-A1-R1_MC12g07896     | 0                      | 0,01191                | black   | "AutoIPR: IPR011701:Major facilitator superfamily; IPR016196:Major facilitator superfamily domain, general substrate transporter;"                                                                                                                                      |
| MvSI-1064-A1-R4_A1g00144       | MvSv-1253-A1-R1_MC12g07894     | 0,05262                | 0                      | black   | "AutoIPR: IPR006789:ARP2/3 complex, 16kDa subunit (p16-Arc);"                                                                                                                                                                                                           |

| MvSI gene ID (a <sub>1</sub> ) | MvSv gene ID (a <sub>1</sub> ) | d <sub>s</sub> in MvSI | d <sub>s</sub> in MvSv | Stratum | Putative function                                                                                                                                                                 |
|--------------------------------|--------------------------------|------------------------|------------------------|---------|-----------------------------------------------------------------------------------------------------------------------------------------------------------------------------------|
| MvSI-1064-A1-R4_A1g01389       | MvSv-1253-A1-R1_MC12g07893     | 0,03083                | 0                      | black   |                                                                                                                                                                                   |
| MvSI-1064-A1-R4_A1g01388       | MvSv-1253-A1-R1_MC12g07892     | 0,04141                | 0,00527                | black   | AutoIPR: IPR005343:Nucleolar complex protein 2;                                                                                                                                   |
| MvSI-1064-A1-R4_A1g01385       | MvSv-1253-A1-R1_MC12g07891     | 0,02823                | 0,001958               | black   | "AutoIPR: IPR009668:RNA polymerase I associated factor, A49-like;"                                                                                                                |
| MvSI-1064-A1-R4_A1g01384       | MvSv-1253-A1-R1_MC12g07890     | 0,0293                 | 0,00419                | black   | AutoIPR: IPR001060:FCH domain; IPR018808:Muscin C-terminal mu homology domain;                                                                                                    |
| MvSI-1064-A1-R4_A1g01369       | MvSv-1253-A1-R1_MC12g07886     | 0,02333                | 0,001781               | black   | AutoIPR: IPR005792:Protein disulphide isomerase;                                                                                                                                  |
| MvSI-1064-A1-R4_A1g01368       | MvSv-1253-A1-R1_MC12g07885     | 0,02638                | 0,005801               | black   | IPR012336:Thioredoxin-like fold;                                                                                                                                                  |
| MvSI-1064-A1-R4_A1g01367       | MvSv-1253-A1-R1_MC12g07884     | 0,01551                | 0,00982                | black   | AutoIPR: IPR019021:Methyl methanesulphonate-sensitivity protein 22;                                                                                                               |
| MvSI-1064-A1-R4_A1g01366       | MvSv-1253-A1-R1_MC12g07883     | 0,0362                 | 0,00599                | black   | AutoIPR: IPR006565:Bromodomain transcription factor;                                                                                                                              |
| MvSI-1064-A1-R4_A1g00845       | MvSv-1253-A1-R1_MC12g07881     | 0,03648                | 0,001712               | black   | "AutoIPR: IPR008937:Ras guanine nucleotide exchange factor; IPR023578:Ras guanine nucleotide exchange factor, domain;"                                                            |
| MvSI-1064-A1-R4_A1g00844       | MvSv-1253-A1-R1_MC12g07880     | 0,008035               | 0                      | black   |                                                                                                                                                                                   |
| MvSI-1064-A1-R4_A1g00843       | MvSv-1253-A1-R1_MC12g07879     | 0,0116                 | 0,002791               | black   | AutoIPR: IPR002060:Squalene/phytoene synthase;                                                                                                                                    |
| MvSI-1064-A1-R4_A1g00842       | MvSv-1253-A1-R1_MC12g07878     | 0,06322                | 0                      | black   | "AutoIPR: IPR002018:Carboxylesterase, type B;"                                                                                                                                    |
| MvSI-1064-A1-R4_A1g00840       | MvSv-1253-A1-R1_MC12g07874     | 0,04014                | 0,004762               | black   |                                                                                                                                                                                   |
| MvSI-1064-A1-R4_A1g00832       | MvSv-1253-A1-R1_MC12g07872     | 0,02415                | 0,001244               | black   | AutoIPR: IPR011009:Protein kinase-like domain;                                                                                                                                    |
| MvSI-1064-A1-R4_A1g00575       | MvSv-1253-A1-R1_MC12g07870     | 0,02905                | 0,003192               | black   | AutoIPR: IPR002058:PAP/25A-associated; IPR002934:Nucleotidyl transferase domain;                                                                                                  |
| MvSI-1064-A1-R4_A1g00569       | MvSv-1253-A1-R1_MC12g07869     | 0,1057                 | 0,04197                | black   |                                                                                                                                                                                   |
| MvSI-1064-A1-R4_A1g00093       | MvSv-1253-A1-R1_MC12g07864     | 0,04154                | 0,006273               | black   |                                                                                                                                                                                   |
| MvSI-1064-A1-R4_A1g00186       | MvSv-1253-A1-R1_MC12g07863     | 0,03298                | 0,01127                | black   | AutoIPR: IPR005013:Dolichyl-diphosphooligosaccharide--protein glycosyltransferase subunit WBP1;                                                                                   |
| MvSI-1064-A1-R4_A1g00185       | MvSv-1253-A1-R1_MC12g07862     | 0,02174                | 0,002111               | black   | AutoIPR: IPR011047:Quinonprotein alcohol dehydrogenase-like superfamily; IPR026895:ER membrane protein complex subunit 1;                                                         |
| MvSI-1064-A1-R4_A1g00184       | MvSv-1253-A1-R1_MC12g07861     | 0                      | 0                      | black   | "AutoIPR: IPR002222:Ribosomal protein S19/S15; IPR023575:Ribosomal protein S19, superfamily;"                                                                                     |
| MvSI-1064-A1-R4_A1g01038       | MvSv-1253-A1-R1_MC12g07859     | 0,01992                | 0                      | black   | AutoIPR: IPR000836:Phosphoribosyltransferase domain; IPR023031:Orotate phosphoribosyltransferase;                                                                                 |
| MvSI-1064-A1-R4_A1g01021       | MvSv-1253-A1-R1_MC12g07856     | 0,02939                | NA                     | black   |                                                                                                                                                                                   |
| MvSI-1064-A1-R4_A1g00175       | MvSv-1253-A1-R1_MC12g07851     | 0,1428                 | 0,06338                | purple  | AutoIPR: IPR004147:UbiB domain;                                                                                                                                                   |
| MvSI-1064-A1-R4_A1g00279       | MvSv-1253-A1-R1_MC12g07848     | 0,09067                | NA                     | purple  |                                                                                                                                                                                   |
| MvSI-1064-A1-R4_A1g00854       | MvSv-1253-A1-R1_MC12g07846     | 0,02438                | 0,04877                | purple  | AutoIPR: IPR016024:Armado-type fold; IPR027140:Importin subunit beta;                                                                                                             |
| MvSI-1064-A1-R4_A1g01227       | MvSv-1253-A1-R1_MC12g07836     | 0,03955                | 0                      | purple  | AutoIPR: IPR021138:Ribosomal protein L18a; IPR023573:Ribosomal protein L18a/LX;                                                                                                   |
| MvSI-1064-A1-R4_A1g00230       | MvSv-1253-A1-R1_MC12g07828     | 0,109                  | 0,1148                 | purple  | "AutoIPR: IPR006818:Histone chaperone, ASF1-like;"                                                                                                                                |
| MvSI-1064-A1-R4_A1g01017       | MvSv-1253-A1-R1_MC12g07823     | 0,02769                | 0,07915                | purple  | AutoIPR: IPR007318:Phospholipid methyltransferase;                                                                                                                                |
| MvSI-1064-A1-R4_A1g00726       | MvSv-1253-A1-R1_MC12g07815     | 0,1145                 | 0,07136                | purple  | AutoIPR: IPR009060:UBA-like; IPR014764:Defective-in-cullin neddylation protein;                                                                                                   |
| MvSI-1064-A1-R4_A1g00624       | MvSv-1253-A1-R1_MC12g07792     | 0,08473                | 0,03743                | purple  | "AutoIPR: IPR016071:Staphylococcal nuclease (SNase-like), OB-fold;"                                                                                                               |
| MvSI-1064-A1-R4_A1g00126       | MvSv-1253-A1-R1_MC12g07780     | 0,4265                 | 0,1397                 | purple  | AutoIPR: IPR019166:Apolipoprotein O;                                                                                                                                              |
| MvSI-1064-A1-R4_A1g00306       | MvSv-1253-A1-R1_MC12g07758     | NA                     | NA                     | orange  |                                                                                                                                                                                   |
| MvSI-1064-A1-R4_A1g00307       | MvSv-1253-A1-R1_MC12g07757     | 0,1172                 | 0,004983               | orange  | AutoIPR: IPR000702:Ribosomal protein L6;                                                                                                                                          |
| MvSI-1064-A1-R4_A1g00441       | MvSv-1253-A1-R1_MC12g07755     | 0,03188                | 0,004631               | orange  | "AutoIPR: IPR009025:DNA-directed RNA polymerase, RBP11-like dimerisation domain; IPR01262:DNA-directed RNA polymerase, insert domain;"                                            |
| MvSI-1064-A1-R4_A1g01253       | MvSv-1253-A1-R1_MC12g07753     | 0,02466                | 0                      | orange  | "AutoIPR: IPR009053:Prefoldin; IPR016655:Prefoldin, subunit 3;"                                                                                                                   |
| MvSI-1064-A1-R4_A1g01252       | MvSv-1253-A1-R1_MC12g07752     | 0,07508                | 0,006777               | orange  |                                                                                                                                                                                   |
| MvSI-1064-A1-R4_A1g00669       | MvSv-1253-A1-R1_MC12g07750     | 0,03217                | 0,002827               | orange  | "AutoIPR: IPR001876:Zinc finger, RanBP2-type; IPR007286:EAP30; IPR011991:Winged helix-turn-helix DNA-binding domain; IPR021648:Vacuolar protein sorting protein 36, GLUE domain;" |
| MvSI-1064-A1-R4_A1g01261       | MvSv-1253-A1-R1_MC12g07749     | 0,03357                | 0,0004392              | orange  | "AutoIPR: IPR007309:B-block binding subunit of TFIIC; IPR017956:AT hook, DNA-binding motif;"                                                                                      |
| MvSI-1064-A1-R4_A1g00407       | MvSv-1253-A1-R1_MC12g07746     | 0,09576                | 0                      | red     | AutoIPR: IPR000999:Ribonuclease III domain;                                                                                                                                       |
| MvSI-1064-A1-R4_A1g00406       | MvSv-1253-A1-R1_MC12g07745     | 0                      | 0,01146                | red     | AutoIPR: IPR000307:Ribosomal protein S16; IPR023803:Ribosomal protein S16 domain;                                                                                                 |
| MvSI-1064-A1-R4_A1g00405       | MvSv-1253-A1-R1_MC12g07744     | 0,003614               | 0                      | red     | AutoIPR: IPR015943:WD40/YVTN repeat-like-containing domain;                                                                                                                       |
| MvSI-1064-A1-R4_A1g00404       | MvSv-1253-A1-R1_MC12g07742     | 0                      | 0                      | red     | AutoIPR: IPR013216:Methyltransferase type 11;                                                                                                                                     |
| MvSI-1064-A1-R4_A1g00402       | MvSv-1253-A1-R1_MC12g07740     | 0,01347                | 0,0006517              | red     | AutoIPR: IPR025279:Stress response protein NST1;                                                                                                                                  |
| MvSI-1064-A1-R4_A1g00401       | MvSv-1253-A1-R1_MC12g07739     | 0                      | 0                      | red     | AutoIPR: IPR002942:RNA-binding S4 domain; IPR022801:Ribosomal protein S4/S9;                                                                                                      |
| MvSI-1064-A1-R4_A1g00399       | MvSv-1253-A1-R1_MC12g07737     | 0                      | 0                      | red     | AutoIPR: IPR001147:Ribosomal protein L21e;                                                                                                                                        |
| MvSI-1064-A1-R4_A1g00398       | MvSv-1253-A1-R1_MC12g07736     | 0                      | 0                      | red     | "AutoIPR: IPR019711:ATPase, F0 complex, subunit H;"                                                                                                                               |
| MvSI-1064-A1-R4_A1g00397       | MvSv-1253-A1-R1_MC12g07735     | 0                      | 0                      | red     | "AutoIPR: IPR007648:ATPase inhibitor, IATP, mitochondria;"                                                                                                                        |
| MvSI-1064-A1-R4_A1g00396       | MvSv-1253-A1-R1_MC12g07734     | 0                      | 0                      | red     | "AutoIPR: IPR007482:Protein-tyrosine phosphatase-like, PTPLA;"                                                                                                                    |
| MvSI-1064-A1-R4_A1g00394       | MvSv-1253-A1-R1_MC12g07732     | 0                      | 0                      | red     |                                                                                                                                                                                   |

| MvSI gene ID (a <sub>1</sub> ) | MvSv gene ID (a <sub>1</sub> ) | d <sub>S</sub> in MvSI | d <sub>S</sub> in MvSv | Stratum | Putative function                                                                                                                                                             |
|--------------------------------|--------------------------------|------------------------|------------------------|---------|-------------------------------------------------------------------------------------------------------------------------------------------------------------------------------|
| MvSI-1064-A1-R4_A1g00392       | MvSv-1253-A1-R1_MC12g07731     | 0,03094                | 0                      | red     |                                                                                                                                                                               |
| MvSI-1064-A1-R4_A1g00391       | MvSv-1253-A1-R1_MC12g07730     | 0,006953               | 0                      | red     | "AutoIPR: IPR001392:Clathrin adaptor, mu subunit; IPR027059:Coatomer delta subunit;"                                                                                          |
| MvSI-1064-A1-R4_A1g00390       | MvSv-1253-A1-R1_MC12g07729     | 0,008075               | 0                      | red     |                                                                                                                                                                               |
| MvSI-1064-A1-R4_A1g00384       | MvSv-1253-A1-R1_MC12g07725     | 0,2181                 | 0                      |         |                                                                                                                                                                               |
| MvSI-1064-A1-R4_A1g00374       | MvSv-1253-A1-R1_MC12g07723     | 0,001469               | 0,008644               | red     | AutoIPR: IPR009075:Acyl-CoA dehydrogenase/oxidase C-terminal; IPR012258:Acyl-CoA oxidase;                                                                                     |
| MvSI-1064-A1-R4_A1g00373       | MvSv-1253-A1-R1_MC12g07722     | 0                      | 0,02706                | red     | "AutoIPR: IPR020869:Exosome complex exonuclease 2, probable; IPR027408:PNase/RNase PH domain;"                                                                                |
| MvSI-1064-A1-R4_A1g00372       | MvSv-1253-A1-R1_MC12g07721     | 0,002337               | 0,002394               | red     | "AutoIPR: IPR000924:Glutamyl/glutaminyl-tRNA synthetase, class Ib; IPR010987:Glutathione S-transferase, C-terminal-like;"                                                     |
| MvSI-1064-A1-R4_A1g00370       | MvSv-1253-A1-R1_MC12g07719     | 0                      | 0,01147                | red     | "AutoIPR: IPR007246:Gaa1-like, GPI transamidase component;"                                                                                                                   |
| MvSI-1064-A1-R4_A1g00369       | MvSv-1253-A1-R1_MC12g07718     | 0,003175               | 0,001599               | red     | AutoIPR: IPR016161:Aldehyde/histidinol dehydrogenase;                                                                                                                         |
| MvSI-1064-A1-R4_A1g00368       | MvSv-1253-A1-R1_MC12g07717     | 0,007024               | 0,002525               | red     | AutoIPR: IPR003358:tRNA (guanine-N-7) methyltransferase;                                                                                                                      |
| MvSI-1064-A1-R4_A1g00367       | MvSv-1253-A1-R1_MC12g07716     | 0,003783               | 0                      | red     | "AutoIPR: IPR011701:Major facilitator superfamily; IPR016196:Major facilitator superfamily domain, general substrate transporter;"                                            |
| MvSI-1064-A1-R4_A1g00113       | MvSv-1253-A1-R1_MC12g07715     | 0,007056               | 0                      | green   | "AutoIPR: IPR002290:Serine/threonine- / dual specificity protein kinase, catalytic domain; IPR020777:Tyrosine-protein kinase, neurotrophic receptor;"                         |
| MvSI-1064-A1-R4_A1g00110       | MvSv-1253-A1-R1_MC12g07712     | 0,001184               | 0                      | green   |                                                                                                                                                                               |
| MvSI-1064-A1-R4_A1g00109       | MvSv-1253-A1-R1_MC12g07711     | 0,004364               | 0,04003                | green   | "AutoIPR: IPR012677:Nucleotide-binding, alpha-beta plait;"                                                                                                                    |
| MvSI-1064-A1-R4_A1g00080       | MvSv-1253-A1-R1_MC12g07706     | 0                      | 0                      | PAR     |                                                                                                                                                                               |
| MvSI-1064-A1-R4_A1g00078       | MvSv-1253-A1-R1_MC12g07704     | 0                      | 0                      | PAR     | AutoIPR: IPR002672:Ribosomal protein L28e;                                                                                                                                    |
| MvSI-1064-A1-R4_A1g00077       | MvSv-1253-A1-R1_MC12g07703     | 0,009973               | 0,03064                | PAR     | AutoIPR: IPR004087:K Homology domain;                                                                                                                                         |
| MvSI-1064-A1-R4_A1g00076       | MvSv-1253-A1-R1_MC12g07702     | 0                      | 0,002377               | PAR     |                                                                                                                                                                               |
| MvSI-1064-A1-R4_A1g00075       | MvSv-1253-A1-R1_MC12g07701     | 0                      | 0,004902               | PAR     | "AutoIPR: IPR008928:Six-hairpin glycosidase-like; IPR010905:Glycosyl hydrolase, family 88;"                                                                                   |
| MvSI-1064-A1-R4_A1g00074       | MvSv-1253-A1-R1_MC12g07700     | 0                      | 0,0205                 | PAR     | AutoIPR: IPR002791:Domain of unknown function DUF89;                                                                                                                          |
| MvSI-1064-A1-R4_A1g00073       | MvSv-1253-A1-R1_MC12g07699     | 0                      | 0,01967                | PAR     | AutoIPR: IPR013763:Cyclin-like;                                                                                                                                               |
| MvSI-1064-A1-R4_A1g00072       | MvSv-1253-A1-R1_MC12g07698     | 0                      | 0,01032                | PAR     | AutoIPR: IPR002123:Phospholipid/glycerol acyltransferase;                                                                                                                     |
| MvSI-1064-A1-R4_A1g00071       | MvSv-1253-A1-R1_MC12g07697     | 0                      | 0                      | PAR     | "AutoIPR: IPR012951:Berberine/berberine-like; IPR016166:FAD-binding, type 2;"                                                                                                 |
| MvSI-1064-A1-R4_A1g00070       | MvSv-1253-A1-R1_MC12g07696     | 0                      | 0                      | PAR     | AutoIPR: IPR009449:GDPGTP exchange factor Sec2p;                                                                                                                              |
| MvSI-1064-A1-R4_A1g00069       | MvSv-1253-A1-R1_MC12g07695     | 0                      | 0,0039                 | PAR     | "AutoIPR: IPR020461:Tyrosine-protein kinase, neurotrophic receptor, type 1;"                                                                                                  |
| MvSI-1064-A1-R4_A1g00068       | MvSv-1253-A1-R1_MC12g07694     | 0                      | 0                      | PAR     |                                                                                                                                                                               |
| MvSI-1064-A1-R4_A1g00067       | MvSv-1253-A1-R1_MC12g07693     | 0                      | 0,0214                 | PAR     |                                                                                                                                                                               |
| MvSI-1064-A1-R4_A1g00065       | MvSv-1253-A1-R1_MC12g07691     | 0                      | 0                      | PAR     | AutoIPR: IPR012696:Phosphonate metabolism PhnM;                                                                                                                               |
| MvSI-1064-A1-R4_A1g00064       | MvSv-1253-A1-R1_MC12g07683     | 0                      | 0                      | PAR     |                                                                                                                                                                               |
| MvSI-1064-A1-R4_A1g00063       | MvSv-1253-A1-R1_MC12g07682     | 0                      | 0                      | PAR     | "AutoIPR: IPR009244:Mediator complex, subunit Med7;"                                                                                                                          |
| MvSI-1064-A1-R4_A1g00062       | MvSv-1253-A1-R1_MC12g07681     | 0                      | 0                      | PAR     | "AutoIPR: IPR012677:Nucleotide-binding, alpha-beta plait;"                                                                                                                    |
| MvSI-1064-A1-R4_A1g00061       | MvSv-1253-A1-R1_MC12g07680     | 0                      | 0                      | PAR     | AutoIPR: IPR001806:Small GTPase superfamily; IPR002041:Ran GTPase; IPR005225:Small GTP-binding protein domain; IPR027417:P-loop containing nucleoside triphosphate hydrolase; |
| MvSI-1064-A1-R4_A1g00057       | MvSv-1253-A1-R1_MC12g07678     | 0                      | 0                      | PAR     |                                                                                                                                                                               |
| MvSI-1064-A1-R4_A1g00056       | MvSv-1253-A1-R1_MC12g07677     | 0                      | 0                      | PAR     | "AutoIPR: IPR005828:General substrate transporter; IPR016196:Major facilitator superfamily domain, general substrate transporter;"                                            |
| MvSI-1064-A1-R4_A1g00055       | MvSv-1253-A1-R1_MC12g07676     | 0                      | 0                      | PAR     | AutoIPR: IPR013960:DASH complex subunit Duo1;role in spindle attachment, chromosome segregation and spindle stability.                                                        |
| MvSI-1064-A1-R4_A1g00054       | MvSv-1253-A1-R1_MC12g07675     | 0                      | 0                      | PAR     | AutoIPR: IPR001269:tRNA-dihydrouridine synthase; IPR013785:Aldolase-type TIM barrel;                                                                                          |
| MvSI-1064-A1-R4_A1g00053       | MvSv-1253-A1-R1_MC12g07674     | 0                      | 0                      | PAR     | AutoIPR: IPR012336:Thioredoxin-like fold;                                                                                                                                     |
| MvSI-1064-A1-R4_A1g00052       | MvSv-1253-A1-R1_MC12g07673     | 0                      | 0                      | PAR     |                                                                                                                                                                               |
| MvSI-1064-A1-R4_A1g00051       | MvSv-1253-A1-R1_MC12g07672     | 0                      | 0                      | PAR     | AutoIPR: IPR000760:Inositol monophosphatase;                                                                                                                                  |
| MvSI-1064-A1-R4_A1g00050       | MvSv-1253-A1-R1_MC12g07671     | 0                      | 0                      | PAR     | "AutoIPR: IPR002092:DNA-directed RNA polymerase, phage-type; IPR024075:DNA-directed RNA polymerase, helix hairpin domain;"                                                    |
| MvSI-1064-A1-R4_A1g00049       | MvSv-1253-A1-R1_MC12g07670     | 0                      | 0                      | PAR     | AutoIPR: IPR002761:DUF71 domain; IPR013813:Endoribonuclease L-PSP/chorismate mutase-like;                                                                                     |
| MvSI-1064-A1-R4_A1g00048       | MvSv-1253-A1-R1_MC12g07669     | 0                      | 0                      | PAR     |                                                                                                                                                                               |
| MvSI-1064-A1-R4_A1g00047       | MvSv-1253-A1-R1_MC12g07668     | 0                      | 0                      | PAR     |                                                                                                                                                                               |
| MvSI-1064-A1-R4_A1g00046       | MvSv-1253-A1-R1_MC12g07667     | 0                      | 0                      | PAR     | "AutoIPR: IPR011330:Glycoside hydrolase/deacetylase, beta/alpha-barrel;"                                                                                                      |
| MvSI-1064-A1-R4_A1g00044       | MvSv-1253-A1-R1_MC12g07665     | 0                      | 0                      | PAR     | "AutoIPR: IPR011330:Glycoside hydrolase/deacetylase, beta/alpha-barrel;"                                                                                                      |
| MvSI-1064-A1-R4_A1g00040       | MvSv-1253-A1-R1_MC12g07664     | 0                      | 0                      | PAR     | "AutoIPR: IPR011330:Glycoside hydrolase/deacetylase, beta/alpha-barrel;"                                                                                                      |
| MvSI-1064-A1-R4_A1g00039       | MvSv-1253-A1-R1_MC12g07663     | 0                      | 0                      | PAR     |                                                                                                                                                                               |
| MvSI-1064-A1-R4_A1g00038       | MvSv-1253-A1-R1_MC12g07661     | 0                      | 0                      | PAR     |                                                                                                                                                                               |

| MvSI gene ID (a <sub>1</sub> ) | MvSv gene ID (a <sub>1</sub> ) | d <sub>s</sub> in MvSI | d <sub>s</sub> in MvSv | Stratum | Putative function                                                                                                                                      |
|--------------------------------|--------------------------------|------------------------|------------------------|---------|--------------------------------------------------------------------------------------------------------------------------------------------------------|
| MvSI-1064-A1-R4_A1g00037       | MvSv-1253-A1-R1_MC12g07660     | 0                      | 0                      | PAR     | "AutoIPR: IPR001567:Peptidase M3A/M3B; IPR024077:Neurolysin/Thimet oligopeptidase, domain 2; IPR024079:Metallopeptidase, catalytic domain;"            |
| MvSI-1064-A1-R4_A1g00036       | MvSv-1253-A1-R1_MC12g07659     | 0                      | 0                      | PAR     | AutoIPR: IPR006565:Bromodomain transcription factor;This recognition is often a prerequisite for protein-histone association and chromatin remodeling. |
| MvSI-1064-A1-R4_A1g00035       | MvSv-1253-A1-R1_MC12g07658     | 0                      | 0                      | PAR     |                                                                                                                                                        |
| MvSI-1064-A1-R4_A1g00033       | MvSv-1253-A1-R1_MC12g07656     | 0                      | 0                      | PAR     |                                                                                                                                                        |
| MvSI-1064-A1-R4_A1g00032       | MvSv-1253-A1-R1_MC12g07655     | 0                      | 0                      | PAR     | "AutoIPR: IPR002035:von Willebrand factor, type A;"                                                                                                    |
| MvSI-1064-A1-R4_A1g00031       | MvSv-1253-A1-R1_MC12g07654     | 0                      | 0                      | PAR     | "AutoIPR: IPR003083:S-crystallin; IPR017933:Glutathione S-transferase/chloride channel, C-terminal;"                                                   |
| MvSI-1064-A1-R4_A1g00030       | MvSv-1253-A1-R1_MC12g07653     | 0                      | 0                      | PAR     |                                                                                                                                                        |
| MvSI-1064-A1-R4_A1g00029       | MvSv-1253-A1-R1_MC12g07652     | 0                      | 0                      | PAR     |                                                                                                                                                        |
| MvSI-1064-A1-R4_A1g00009       | MvSv-1253-A1-R1_MC12g07644     | 0                      | 0                      | PAR     | "AutoIPR: IPR006785:Peroxisome membrane anchor protein Pex14p, N-terminal; IPR025655:Peroxisomal membrane protein 14;"                                 |
| MvSI-1064-A1-R4_A1g00008       | MvSv-1253-A1-R1_MC12g07643     | 0                      | 0                      | PAR     | AutoIPR: IPR013087:Zinc finger C2H2-type/integrase DNA-binding domain;                                                                                 |
| MvSI-1064-A1-R4_A1g00007       | MvSv-1253-A1-R1_MC12g07642     | 0                      | 0                      | PAR     | AutoIPR: IPR008984:SMAD/FHA domain;                                                                                                                    |
| MvSI-1064-A1-R4_A1g00006       | MvSv-1253-A1-R1_MC12g07641     | 0                      | 0                      | PAR     | "AutoIPR: IPR003204:Cytochrome c oxidase, subunit Va/VI;"                                                                                              |
| MvSI-1064-A1-R4_A1g00005       | MvSv-1253-A1-R1_MC12g07640     | 0                      | 0                      | PAR     |                                                                                                                                                        |
| MvSI-1064-A1-R4_A1g00004       | MvSv-1253-A1-R1_MC12g07639     | 0                      | 0                      | PAR     | AutoIPR: IPR003121:SWIB/MDM2 domain;                                                                                                                   |

**Table S4. Raw data summary and assembly statistics for the genomes generated in this study.**

| sample                                          | Raw data summary |            |                         |          |           |             |                                        | Assembly statistics |           |                 |                 |         |                |          |                |                  |                    |                    |
|-------------------------------------------------|------------------|------------|-------------------------|----------|-----------|-------------|----------------------------------------|---------------------|-----------|-----------------|-----------------|---------|----------------|----------|----------------|------------------|--------------------|--------------------|
|                                                 | # Smart cell     | # Subreads | Max Subread Length (bp) | N50 (bp) | Mean (bp) | Median (bp) | BP                                     | Accession numbers   | # Contigs | Min length (bp) | Max length (bp) | N50 BP  | L50 (#contigs) | N90 (bp) | L90 (#contigs) | mean length (bp) | Median Length (bp) | Assembly size (bp) |
| <i>Microbotryum lagerheimii</i> 1253 A1         | 4                | 589978     | 41394                   | 9526     | 7290      | 7059        | 4 301 220 311                          | ERS1013677          | 42        | 6001            | 3235273         | 1584903 | 7              | 462124   | 17             | 614444           | 172652             | 25 806 628         |
| <i>Microbotryum lagerheimii</i> 1253 A2         | 4                | 587933     | 43134                   | 9660     | 7394      | 7202        | 4 347 011 348                          | ERS1013678          | 37        | 7917            | 3230111         | 1585144 | 7              | 534025   | 17             | 693725           | 474693             | 25 667 824         |
| <i>Microbotryum violaceum</i> s. str. 1249 A1   | 4                | 548702     | 44168                   | 11951    | 8759      | 8361        | 4 806 182 398                          | ERS1013671          | 166       | 5956            | 2602331         | 1183707 | 10             | 65951    | 47             | 191449           | 31698              | 31 780 530         |
| <i>Microbotryum violaceum</i> s. str. 1249 A2   | 4                | 456117     | 46941                   | 13250    | 9516      | 8962        | 4 340 608 458                          | ERS1013672          | 61        | 8455            | 2644084         | 1643691 | 7              | 606103   | 17             | 456993           | 30510              | 27 876 544         |
| <i>Microbotryum lychnidis-dioicae</i> Lamole A1 |                  |            |                         |          |           |             | Raw data from Badouin et al. 2015 (12) | ERS1013679          | 48        | 12190           | 3412169         | 1736850 | 6              | 648002   | 16             | 622941           | 44679              | 29 901 156         |
| <i>Microbotryum lychnidis-dioicae</i> Lamole A2 |                  |            |                         |          |           |             | Raw data from Badouin et al. 2015 (12) | ERS459551           | 37        | 15308           | 4051571         | 1730088 | 6              | 1040457  | 14             | 819414           | 312349             | 30 318 316         |
| <i>Microbotryum intermedium</i> 1389            | 3                | 562278     | 62677                   | 11040    | 8512      | 8220        | 4 786 123 623                          | ERS1324257          | 24        | 16897           | 2982376         | 1644950 | 6              | 1002499  | 13             | 977543           | 1002499            | 23 461 035         |
| <i>Microbotryum silenes-dioicae</i> 1303_A1     | 7                | 938931     | 46274                   | 10834    | 7946      | 7576        | 7 460 889 114                          | ERS1436592          | 144       | 6283            | 2425171         | 936137  | 12             | 153077   | 45             | 233285           | 32003              | 33 593 023         |
| <i>Microbotryum silenes-dioicae</i> 1303_A2     | 6                | 490924     | 46480                   | 12620    | 8406      | 7474        | 4 126 642 950                          | ERS1436593          | 128       | 8587            | 3251277         | 1321747 | 10             | 359665   | 30             | 265304           | 29362              | 33 958 966         |



**Table S5. *Microbotryum lychnidis-dioicae* and *M. silenes-dioicae* strains used for performing polymorphism analyses.** Reference to strain ID, species, mating-type, accession number, number and percentage of reads mapped as proper pairs and reference of the original genome publication, are given.

| Strain ID      | Species                     | Mating-type    | Accession number      | Number of reads mapped as proper pairs | % of reads mapped as proper pairs | Reference |
|----------------|-----------------------------|----------------|-----------------------|----------------------------------------|-----------------------------------|-----------|
| MvSd-335-H3-A1 | <i>M. silenes-dioicae</i>   | a <sub>1</sub> | SRS1072004            | 102696842                              | 96.28%                            | (48)      |
| MvSd-336-01-A1 | <i>M. silenes-dioicae</i>   | a <sub>1</sub> | SRS1072005            | 127697676                              | 96.85%                            | (48)      |
| MvSd-578-2-A2  | <i>M. silenes-dioicae</i>   | a <sub>2</sub> | SRS1072006 SRS1072007 | 78559190                               | 96.54%                            | (48)      |
| MvSd-69-05-A2  | <i>M. silenes-dioicae</i>   | a <sub>2</sub> | SRS1072010            | 121301046                              | 97.35%                            | (48)      |
| MvSd-707-1-A2  | <i>M. silenes-dioicae</i>   | a <sub>2</sub> | SRS1072011            | 138917854                              | 96.93%                            | (48)      |
| MvSd-72-A2     | <i>M. silenes-dioicae</i>   | a <sub>2</sub> | SRS1072012 SRS1072013 | 181254142                              | 97.40%                            | (48)      |
| MvSd-851-6-A2  | <i>M. silenes-dioicae</i>   | a <sub>2</sub> | SRS1072015            | 113257210                              | 97.21%                            | (48)      |
| MvSd-900-1-A1  | <i>M. silenes-dioicae</i>   | a <sub>1</sub> | SRS1072016            | 143422672                              | 97.33%                            | (48)      |
| MvSd-932-2-A2  | <i>M. silenes-dioicae</i>   | a <sub>2</sub> | SRS1072017            | 107796114                              | 96.87%                            | (48)      |
| MvSd-937-2-A2  | <i>M. silenes-dioicae</i>   | a <sub>2</sub> | SRS1072018            | 134111998                              | 97.24%                            | (48)      |
| MvSd-949-2-A1  | <i>M. silenes-dioicae</i>   | a <sub>1</sub> | SRS1072019            | 105576460                              | 96.66%                            | (48)      |
| MvSd-IT02-A2   | <i>M. silenes-dioicae</i>   | a <sub>2</sub> | SRS1072020            | 126925450                              | 96.74%                            | (48)      |
| MvSd-sp002-A1  | <i>M. silenes-dioicae</i>   | a <sub>1</sub> | SRS1072021            | 133835232                              | 96.73%                            | (48)      |
| MvSd-sp003-A1  | <i>M. silenes-dioicae</i>   | a <sub>1</sub> | SRS1072023            | 110615508                              | 97.32%                            | (48)      |
| MvSI-00-10-A2  | <i>M. lychnidis-dioicae</i> | a <sub>2</sub> | SRS1072024            | 71471502                               | 95.32%                            | (48)      |
| MvSI-100-6-A1  | <i>M. lychnidis-dioicae</i> | a <sub>1</sub> | SRS1072025            | 70881632                               | 95.69%                            | (48)      |
| MvSI-140-01-A2 | <i>M. lychnidis-dioicae</i> | a <sub>2</sub> | SRS1072033            | 157160988                              | 95.07%                            | (48)      |
| MvSI-141-01-A2 | <i>M. lychnidis-dioicae</i> | a <sub>2</sub> | SRS1072034            | 66844444                               | 94.89%                            | (48)      |
| MvSI-40-01-A2  | <i>M. lychnidis-dioicae</i> | a <sub>2</sub> | SRS1072035            | 65532992                               | 94.18%                            | (48)      |
| MvSI-446-2-A2  | <i>M. lychnidis-dioicae</i> | a <sub>2</sub> | SRS1072038 SRS1072039 | 68358472                               | 94.97%                            | (48)      |
| MvSI-466-3-A1  | <i>M. lychnidis-dioicae</i> | a <sub>1</sub> | SRS1072042 SRS1072043 | 75508212                               | 94.92%                            | (48)      |
| MvSI-576-A2    | <i>M. lychnidis-dioicae</i> | a <sub>2</sub> | SRS1072044 SRS1072045 | 56128954                               | 95.40%                            | (48)      |
| MvSI-641-A1    | <i>M. lychnidis-dioicae</i> | a <sub>1</sub> | SRS1072046 SRS1072047 | 87723406                               | 95.25%                            | (48)      |
| MvSI-661-A2    | <i>M. lychnidis-dioicae</i> | a <sub>2</sub> | SRS1072050            | 84294192                               | 94.85%                            | (48)      |
| MvSI-665-A2    | <i>M. lychnidis-dioicae</i> | a <sub>2</sub> | SRS1072048 SRS1072049 | 37283112                               | 94.87%                            | (48)      |
| MvSI-687-5-A2  | <i>M. lychnidis-dioicae</i> | a <sub>2</sub> | SRS1072051            | 46854784                               | 94.81%                            | (48)      |
| MvSI-830-2-A1  | <i>M. lychnidis-dioicae</i> | a <sub>1</sub> | SRS1072056            | 81814412                               | 95.81%                            | (48)      |
| MvSI-856-2-A1  | <i>M. lychnidis-dioicae</i> | a <sub>1</sub> | SRS1072057            | 37685654                               | 94.57%                            | (48)      |
| MvSI-I00-3_A2  | <i>M. lychnidis-dioicae</i> | a <sub>2</sub> | SRS1072064            | 78297378                               | 95.19%                            | (48)      |
| MvSI-IOA-A1    | <i>M. lychnidis-dioicae</i> | a <sub>1</sub> | SRS1072065            | 61186726                               | 95.57%                            | (48)      |
| MvSI-W-1069-A1 | <i>M. lychnidis-dioicae</i> | a <sub>1</sub> | SRS781520             | 46860062                               | 92.35%                            | (26)      |
| MvSI-W-1088-A1 | <i>M. lychnidis-dioicae</i> | a <sub>1</sub> | SRS781522             | 38830336                               | 92.42%                            | (26)      |
| MvSI-W-1089-A2 | <i>M. lychnidis-dioicae</i> | a <sub>2</sub> | SRS781488             | 38918966                               | 91.94%                            | (26)      |
| MvSI-W-1090-A2 | <i>M. lychnidis-dioicae</i> | a <sub>2</sub> | SRS781491             | 31476556                               | 93.72%                            | (26)      |
| MvSI-W-1103-A2 | <i>M. lychnidis-dioicae</i> | a <sub>2</sub> | SRS781483             | 45555798                               | 91.93%                            | (26)      |
| MvSI-W-405-A1  | <i>M. lychnidis-dioicae</i> | a <sub>1</sub> | SRS780332             | 88330498                               | 94.39%                            | (26)      |
| MvSI-W-769-A1  | <i>M. lychnidis-dioicae</i> | a <sub>1</sub> | SRS781521             | 42520222                               | 91.74%                            | (26)      |
| MvSI-W-920-A2  | <i>M. lychnidis-dioicae</i> | a <sub>2</sub> | SRS781485             | 42908076                               | 92.50%                            | (26)      |

**Table S6. Nucleotide diversity ( $\theta_{\pi}$ ) and divergence (mean number of pairwise differences) estimates in pseudo-autosomal regions (PARs) and evolutionary strata in:**

(A) *Microbotryum silenes-dioicae*

| Gene set       | Mean diversity $\pm$ SE |                         | Divergence from <i>M. violaceum</i> s. str. |                         |
|----------------|-------------------------|-------------------------|---------------------------------------------|-------------------------|
|                | All sites               | Silent sites            | All sites                                   | Silent sites            |
| Purple stratum | 3.24e-02 $\pm$ 1.53e-02 | 5.23e-02 $\pm$ 1.98e-02 | 4.71e-02 $\pm$ 2.04e-02                     | 6.09e-02 $\pm$ 1.42e-02 |
| Blue stratum   | 2.43e-02 $\pm$ 1.09e-02 | 3.72e-02 $\pm$ 1.72e-02 | 5.61e-02 $\pm$ 2.09e-02                     | 6.69e-02 $\pm$ 1.45e-02 |
| Orange stratum | 6.25e-02 $\pm$ 4.75e-02 | 8.88e-02 $\pm$ 6.2e-02  | 7.87e-02 $\pm$ 5.16e-02                     | 6.25e-02 $\pm$ 2.02e-02 |
| Black stratum  | 9e-03 $\pm$ 8.79e-04    | 1.45e-02 $\pm$ 1.29e-03 | 2.33e-02 $\pm$ 1.13e-03                     | 3.57e-02 $\pm$ 1.11e-03 |
| Red stratum    | 2.47e-03 $\pm$ 1.56e-03 | 4.03e-03 $\pm$ 2.41e-03 | 2.26e-02 $\pm$ 3.12e-03                     | 3.88e-02 $\pm$ 3.8e-03  |
| Green stratum  | 2.22e-03 $\pm$ 3.6e-04  | 3.4e-03 $\pm$ 8.92e-04  | 2.39e-02 $\pm$ 6.44e-03                     | 4.53e-02 $\pm$ 1.27e-02 |
| PARs           | 2.46e-04 $\pm$ 3.37e-05 | 4.11e-04 $\pm$ 8.56e-05 | 4.1e-02 $\pm$ 2.11e-03                      | 8.18e-02 $\pm$ 3.54e-03 |

(B) *Microbotryum lychnidis-dioicae* (whole data set)

| Gene set       | Mean diversity $\pm$ SE |                         | Divergence from <i>M. violaceum</i> s. str. |                         |
|----------------|-------------------------|-------------------------|---------------------------------------------|-------------------------|
|                | All sites               | Silent sites            | All sites                                   | Silent sites            |
| Purple stratum | 3.6e-02 $\pm$ 1.48e-02  | 5.53e-02 $\pm$ 2.02e-02 | 5.28e-02 $\pm$ 2.05e-02                     | 6.46e-02 $\pm$ 1.47e-02 |
| Blue stratum   | 2.44e-02 $\pm$ 9.91e-03 | 3.92e-02 $\pm$ 1.58e-02 | 5.66e-02 $\pm$ 1.98e-02                     | 7.01e-02 $\pm$ 1.39e-02 |
| Orange stratum | 6.16e-02 $\pm$ 4.51e-02 | 8.94e-02 $\pm$ 6.01e-02 | 8.06e-02 $\pm$ 5.18e-02                     | 6.5e-02 $\pm$ 2.04e-02  |
| Black stratum  | 9.88e-03 $\pm$ 6.78e-04 | 1.61e-02 $\pm$ 1.08e-03 | 2.57e-02 $\pm$ 1.02e-03                     | 3.88e-02 $\pm$ 1.13e-03 |
| Red stratum    | 3.11e-03 $\pm$ 1.34e-03 | 3.99e-03 $\pm$ 2.36e-03 | 2.32e-02 $\pm$ 2.88e-03                     | 4.03e-02 $\pm$ 4.13e-03 |
| Green stratum  | 1.47e-03 $\pm$ 4.39e-04 | 2.49e-03 $\pm$ 1.2e-04  | 2.48e-02 $\pm$ 6.92e-03                     | 4.75e-02 $\pm$ 1.12e-02 |
| PARs           | 2.61e-03 $\pm$ 2.22e-04 | 3.16e-03 $\pm$ 2.64e-04 | 4.41e-02 $\pm$ 2.24e-03                     | 8.78e-02 $\pm$ 3.79e-03 |

(C) the North-Western cluster of *Microbotryum lychnidis-dioicae*

| Gene set       | Mean diversity $\pm$ SE |                         | Divergence from <i>M. violaceum</i> s. str. |                         |
|----------------|-------------------------|-------------------------|---------------------------------------------|-------------------------|
|                | All sites               | Silent sites            | All sites                                   | Silent sites            |
| Purple stratum | 3.92e-02 $\pm$ 1.61e-02 | 5.77e-02 $\pm$ 2.03e-02 | 5.23e-02 $\pm$ 1.98e-02                     | 6.34e-02 $\pm$ 1.36e-02 |
| Blue stratum   | 2.68e-02 $\pm$ 1.09e-02 | 3.99e-02 $\pm$ 1.6e-02  | 5.69e-02 $\pm$ 1.98e-02                     | 7.03e-02 $\pm$ 1.38e-02 |
| Orange stratum | 6.72e-02 $\pm$ 4.95e-02 | 9.03e-02 $\pm$ 6.11e-02 | 7.8e-02 $\pm$ 4.93e-02                      | 6.41e-02 $\pm$ 1.93e-02 |
| Black stratum  | 1.05e-02 $\pm$ 7.57e-04 | 1.63e-02 $\pm$ 1.12e-03 | 2.58e-02 $\pm$ 1.02e-03                     | 3.89e-02 $\pm$ 1.15e-03 |
| Red stratum    | 3.4e-03 $\pm$ 1.45e-03  | 4.85e-03 $\pm$ 2.41e-03 | 2.36e-02 $\pm$ 2.93e-03                     | 4.07e-02 $\pm$ 4.18e-03 |
| Green stratum  | 4.72e-04 $\pm$ 3.69e-04 | 9.37e-04 $\pm$ 9.37e-04 | 2.5e-02 $\pm$ 7.24e-03                      | 4.75e-02 $\pm$ 1.22e-02 |
| PARs           | 9.05e-04 $\pm$ 1.23e-04 | 1.49e-03 $\pm$ 2.19e-04 | 4.45e-02 $\pm$ 2.29e-03                     | 8.76e-02 $\pm$ 3.79e-03 |

(D) the Southern cluster of *Microbotryum lychnidis-dioicae*

| Gene set       | Mean diversity $\pm$ SE |                         | Divergence from <i>M. violaceum</i> s. str. |                         |
|----------------|-------------------------|-------------------------|---------------------------------------------|-------------------------|
|                | All sites               | Silent sites            | All sites                                   | Silent sites            |
| Purple stratum | 4.23e-02 $\pm$ 1.76e-02 | 5.54e-02 $\pm$ 2e-02    | 4.73e-02 $\pm$ 1.63e-02                     | 5.64e-02 $\pm$ 1.07e-02 |
| Blue stratum   | 2.85e-02 $\pm$ 1.18e-02 | 3.82e-02 $\pm$ 1.57e-02 | 5.66e-02 $\pm$ 1.99e-02                     | 6.93e-02 $\pm$ 1.36e-02 |
| Orange stratum | 7.29e-02 $\pm$ 5.34e-02 | 8.82e-02 $\pm$ 5.9e-02  | 6.26e-02 $\pm$ 3.53e-02                     | 5.88e-02 $\pm$ 1.41e-02 |
| Black stratum  | 1.1e-02 $\pm$ 8.12e-04  | 1.54e-02 $\pm$ 1.07e-03 | 2.53e-02 $\pm$ 9.53e-04                     | 3.85e-02 $\pm$ 1.11e-03 |
| Red stratum    | 2.8e-03 $\pm$ 1.64e-03  | 3.57e-03 $\pm$ 2.24e-03 | 2.35e-02 $\pm$ 3.16e-03                     | 4.01e-02 $\pm$ 4.28e-03 |
| Green stratum  | 8.3e-04 $\pm$ 5.2e-04   | 1.2e-03 $\pm$ 1.2e-03   | 2.5e-02 $\pm$ 6.54e-03                      | 4.81e-02 $\pm$ 9.62e-03 |
| PARs           | 1.07e-03 $\pm$ 1.29e-04 | 1.66e-03 $\pm$ 2.58e-04 | 4.39e-02 $\pm$ 2.19e-03                     | 8.71e-02 $\pm$ 3.78e-03 |

**Table S7. Results of maximum-likelihood Hudson-Kreitman-Agade (MLHKA) tests for assessing whether differences in diversity between each evolutionary stratum and the pseudo-autosomal regions (PARs) is due to balancing selection or elevated mutation rates.** Genes were concatenated per stratum unless specified otherwise. Statistically significant results before and after correction for multiple testing at the significance level of 0.05 are indicated in bold; d.f.: degrees of freedom; Selection coefficient: maximum likelihood estimate of the selection coefficient.

(A) In *Microbotryum silenes-dioicae*

| Test                                    | d.f. | Selection coefficient | ln likelihood null model | ln likelihood alternative model | Chi2 statistics | p-values        | Adjusted p-values |
|-----------------------------------------|------|-----------------------|--------------------------|---------------------------------|-----------------|-----------------|-------------------|
| Purple stratum vs PAR                   | 1    | 60.4123               | -284.798                 | -370.048                        | 170.5           | <b>5.75e-39</b> | <b>4.03e-38</b>   |
| Blue stratum vs PAR                     | 1    | 44.6019               | -286.815                 | -370.684                        | 167.74          | <b>2.31e-38</b> | <b>1.38e-37</b>   |
| Orange stratum vs PAR                   | 1    | 75.4768               | -286.583                 | -391.715                        | 210.26          | <b>1.20e-47</b> | <b>9.62e-47</b>   |
| Black stratum vs PAR                    | 1    | 24.844                | -287.805                 | -340.116                        | 104.62          | <b>1.48e-24</b> | <b>7.39e-24</b>   |
| Red stratum vs PAR                      | 1    | 7.6661                | -288.224                 | -300.015                        | 23.58           | <b>1.20e-06</b> | <b>3.59e-06</b>   |
| Green stratum vs PAR                    | 1    | 4.74454               | -285.191                 | -289.094                        | 7.81            | <b>5.21e-03</b> | <b>5.21e-03</b>   |
| Red stratum vs PAR (no concatenation)   | 16   | 56.0665               | -335.885                 | -380.386                        | 89              | <b>3.82e-12</b> | <b>1.53e-11</b>   |
| Green stratum vs PAR (no concatenation) | 3    | 10.3826               | -289.177                 | -297.46                         | 16.57           | <b>8.68e-04</b> | <b>1.74e-03</b>   |

(B) In *Microbotryum lychnidis-dioicae* (whole data set)

| Test                  | d.f. | Selection coefficient | ln likelihood null model | ln likelihood alternative model | Chi2 statistics | p-values        | Adjusted p-values |
|-----------------------|------|-----------------------|--------------------------|---------------------------------|-----------------|-----------------|-------------------|
| Purple stratum vs PAR | 1    | 12.1267               | -383.916                 | -412.85                         | 57.87           | <b>2.80e-14</b> | <b>1.40e-13</b>   |
| Blue stratum vs PAR   | 1    | 10.7939               | -386.523                 | -412.316                        | 51.59           | <b>6.85e-13</b> | <b>2.74e-12</b>   |
| Orange stratum vs PAR | 1    | 18.0431               | -384.52                  | -424.17                         | 79.3            | <b>5.34e-19</b> | <b>3.20e-18</b>   |
| Black stratum vs PAR  | 1    | 6.39375               | -385.591                 | -402.312                        | 33.44           | <b>7.34e-09</b> | <b>2.20e-08</b>   |
| Red stratum vs PAR    | 1    | 1.94212               | -383.672                 | -385.361                        | 3.38            | 6.61e-02        | 1.32e-01          |
| Green stratum vs PAR  | 1    | 0.795155              | -384.517                 | -380.695                        | -7.64           | 1.00e+00        | 1.00e+00          |

(C) In the North-Western cluster of *Microbotryum lychnidis-dioicae*

| Test                                    | d.f. | Selection coefficient | ln likelihood null model | ln likelihood alternative model | Chi2 statistics | p-values        | Adjusted p-values |
|-----------------------------------------|------|-----------------------|--------------------------|---------------------------------|-----------------|-----------------|-------------------|
| Red stratum vs PAR                      | 1    | 4.96955               | -344.795                 | -336.841                        | 15.91           | <b>6.65e-05</b> | <b>1.99e-04</b>   |
| Green stratum vs PAR                    | 1    | 0.941793              | -333.064                 | -336.68                         | -7.23           | 1.00e+00        | 1.00e+00          |
| Red stratum vs PAR (no concatenation)   | 16   | 2.29673               | -417.742                 | -388.587                        | 58.31           | <b>1.01e-06</b> | <b>4.02e-06</b>   |
| Green stratum vs PAR (no concatenation) | 3    | 0                     | -332.85                  | -333.992                        | -2.28           | 1.00e+00        | 1.00e+00          |

(D) In the Southern cluster of *Microbotryum lychnidis-dioicae*

| Test                                    | d.f. | Selection coefficient | ln likelihood null model | ln likelihood alternative model | Chi2 statistics | p-values        | Adjusted p-values |
|-----------------------------------------|------|-----------------------|--------------------------|---------------------------------|-----------------|-----------------|-------------------|
| Red stratum vs PAR                      | 1    | 4.0771                | -348.271                 | -341.431                        | 13.68           | <b>2.17e-04</b> | <b>8.67e-04</b>   |
| Green stratum vs PAR                    | 1    | 1.1329                | -339.258                 | -342.942                        | -7.37           | 1.00e+00        | 1.00e+00          |
| Red stratum vs PAR (no concatenation)   | 16   | 1.48588               | -410.369                 | -392.762                        | 32.65           | <b>8.22e-03</b> | <b>2.46e-02</b>   |
| Green stratum vs PAR (no concatenation) | 3    | 0.639097              | -338.134                 | -342.151                        | -8.03           | 1.00e+00        | 1.00e+00          |
